# Supplementary material for: Localized Cation Unlocks Unique Activity–Selectivity Trends in Molecular Oxygen Reduction Catalysis
Source: Research Square preprint supplement (doi:10.21203/rs.3.rs-7095498/v1), 2025-08-19
Supplement: Supplementary file 1 [file 4277d625468390cb8c93cd1e.docx]

Supporting Information

**Localized Cation Unlocks Unique Activity–Selectivity Trends in Molecular Oxygen Reduction Catalysis**

Hwi Yul Jo†a, Vom Kang†a, Dongyoung Kim†a, Youngchol Jeonga, Jinrok Oha, Jihyun Kima, Jaeyune Ryu d,e*, and Seung Jun Hwang a,b,c*

*aDepartment of Chemistry, Pohang University of Science and Technology, Pohang, 37673, Republic of Korea*

*bDivision of Advanced Materials Science, Pohang University of Science and Technology, Pohang, 37673, Republic of Korea*

*cInstitute for Convergence Research and Education in Advanced Technology (I-CREATE), Yonsei University, Seoul, 03722, Republic of Korea*

*dCenter for Nanoparticle Research, Institute for Basic Science (IBS), Seoul 08826, Republic of Korea*

*eSchool of Chemical and Biological Engineering, Institute of Chemical Processes, Seoul National University (SNU), Seoul, 08826, Republic of Korea*

**Email: sjhwang17@postech.ac.kr*

**Table of Contents**

[1. Detailed Synthesis and Characterization 3](#_Toc200909545)

[2. Investigation of Field Effects in Model Complexes through Spectroscopic Analysis 33](#_Toc200909546)

[3. Optical Kinetic Data: UV-vis Spectroscopic Experimental Results 58](#_Toc200909547)

[4. Quantitative Analysis of H2O2 Formed by UV-vis Spectroscopy 66](#_Toc200909548)

[5. X-ray Absorption Spectroscopy Analysis of **FeL1–Cl** and **FeIIIL1–OO** Complexes
: Comparative Study of Sc(OTf)3 Effects 77](#_Toc200909549)

[6. Cleavage of **FeIIIL1–OOH** by the Addition of a Chemical Reductant 79](#_Toc200909550)

[7. RDE&RRDE Set-up 82](#_Toc200909551)

[8. RDE (Rotating Disk Electrode) Measurement 83](#_Toc200909552)

[9. RRDE (Rotating Ring Disk Electrode) Measurement 87](#_Toc200909553)

[10. Mechanistic Study 122](#_Toc200909554)

[11. Computational Analysis 127](#_Toc200909555)

[12. Copies of NMR spectra 136](#_Toc200909556)

[13. Reference 146](#_Toc200909557)

# Detailed Synthesis and Characterization


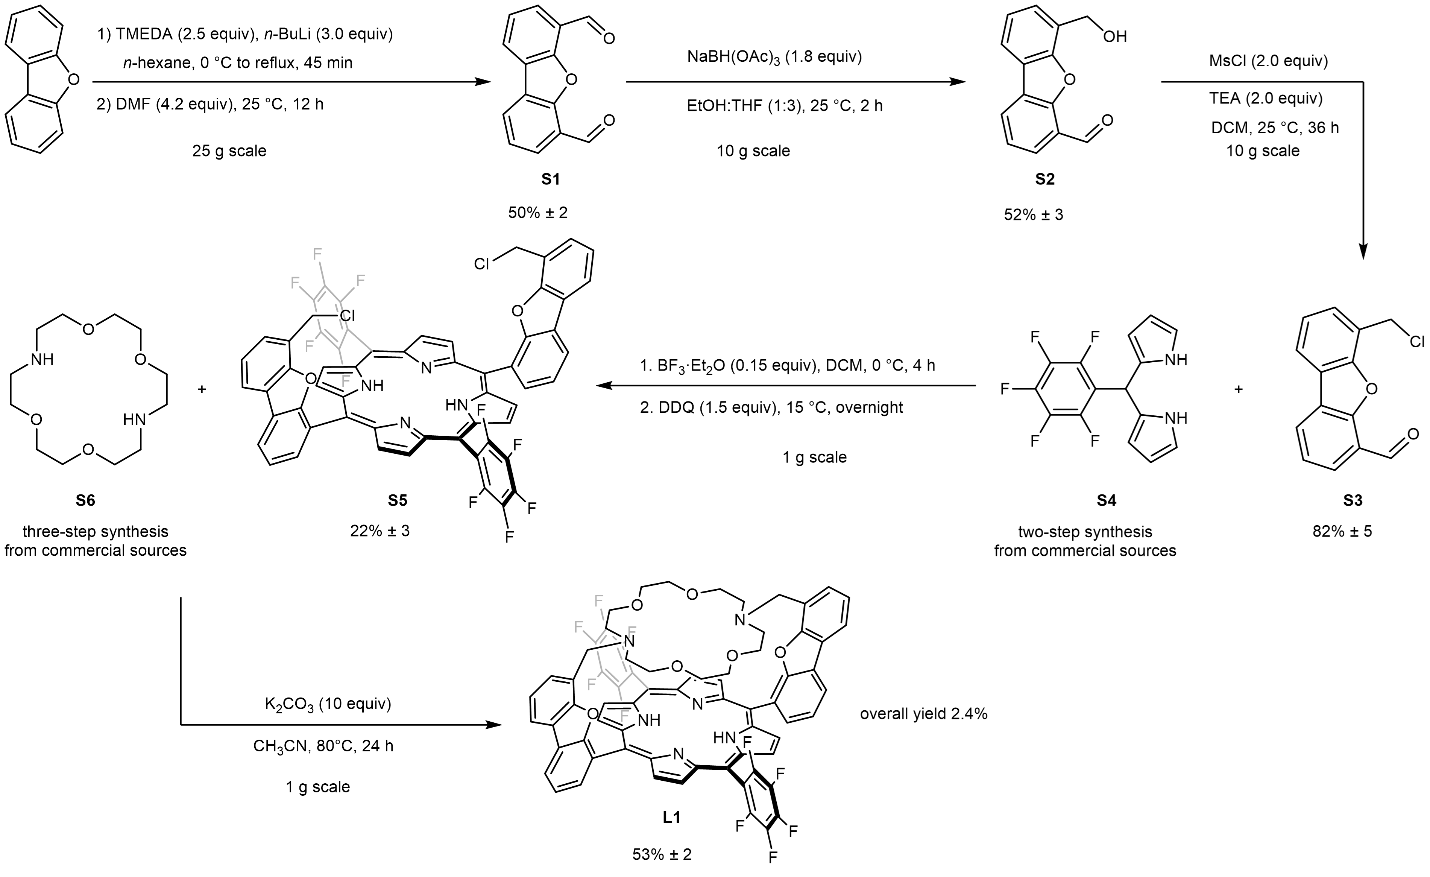


Supplementary Scheme . Overall synthesis of L1

## Synthesis of **S1**


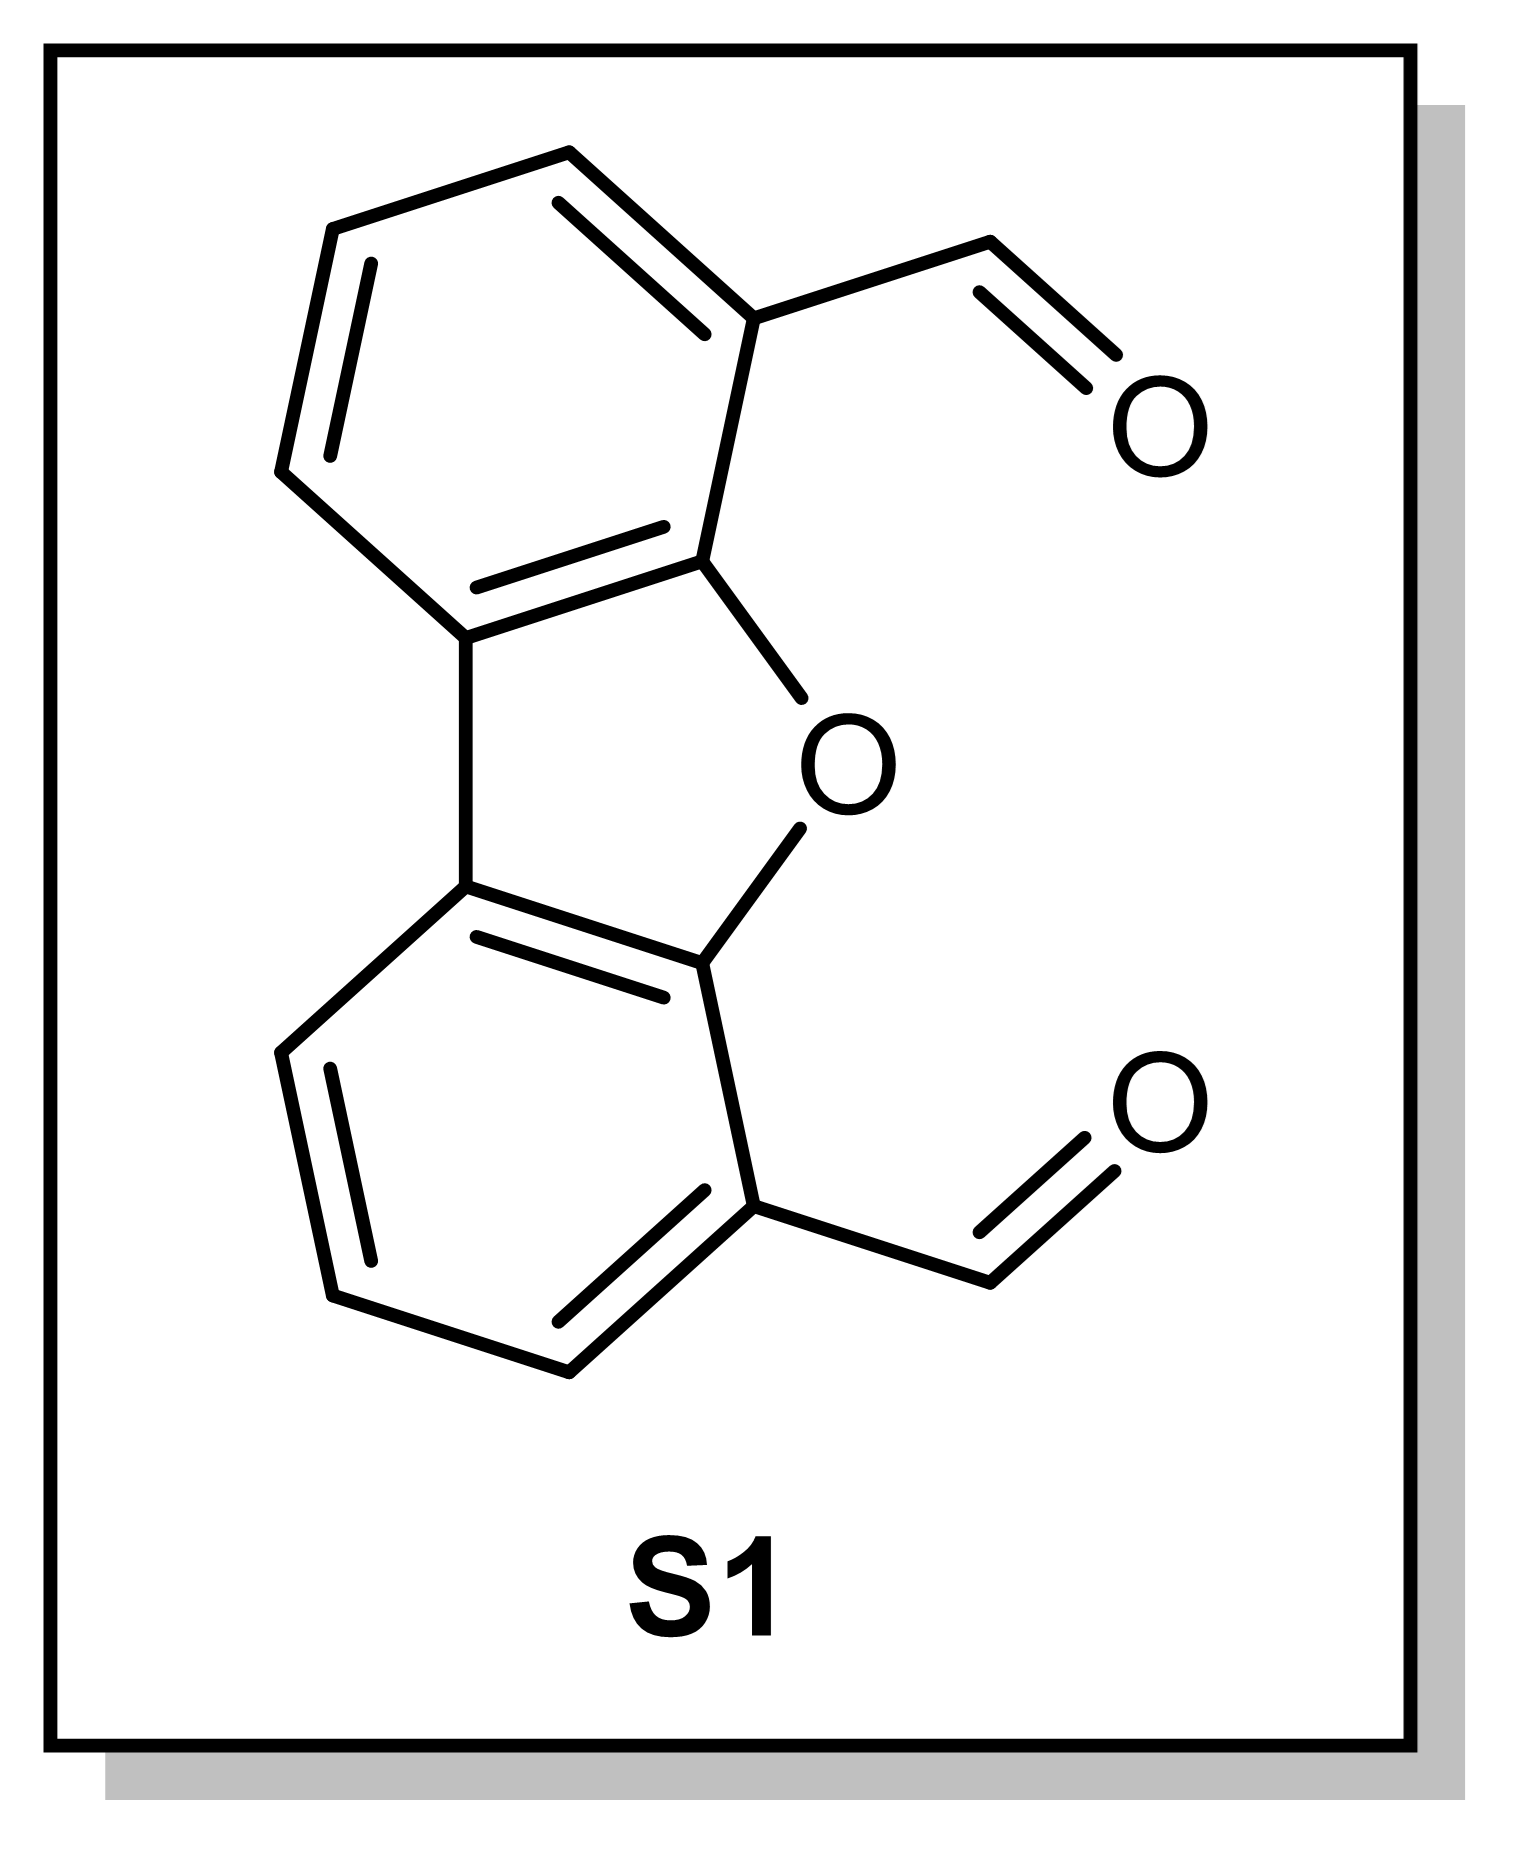
 A mixture of **dibenzofuran** (25 g, 0.15 mol, 1.0 equiv) and freshly distilled *n*-hexane (140 mL) was stirred 25 ℃ in a two-neck-1-L round-bottomed flask under N2,then add freshly distilled *N,N,N’,N’*-tetramethylethylenediamine (54 mL, 0.36 mmol, 2.5 equiv) by using 60 mL syringe. The resulting mixture was cooled down to 0 ℃ with ice-bath and equipped with dropping funnel against the flow of N2. After filling the dropping funnel with *n*-butyllithium (1.6 M in hexane, 270 mL, 0.43 mol, 3.0 equiv) was added dropwise for 90 min. Upon the complete addition of *n*-butyllithium, the dropping funnel was changed to a reflux condenser and the reaction was heated to reflux at 90 ℃ for 45 min. After cooling to 25 ℃, freshly distilled DMF (48 mL, 62 mmol, 4.2 equiv) was added with syringe pump (1 mL/min) for 48 min. After stirring the reaction mixture at 25 ℃ for overnight under N2, the reaction was quenched with slurry ice-water (400 mL) by pouring to the reaction mixture against N2 with vigorous stirring. Precipitated ivory solids were collected by vacuum filtration and dried for 90 min. Collected solids were triturated with EtOAc (1 × 250 mL + 2 × 25 mL) and MeOH (1 × 100 mL + 1 × 50 mL). The triturated solids were dried under reduced pressure for an hour to afford **S1** (16.7 g, 74.5 mmol, 50.2%).

**1H NMR (500 MHz, CDCl3, 23 ℃)**: δ 10.71 (s, 2H, CHO), 8.26 (d, *J* = 7.5 Hz, 2H, ArH), 8.06 (d, *J* = 8.0 Hz, 2H, ArH), 7.56 (t, *J* = 7.5 Hz, 2H, ArH).

## Synthesis of **S2**


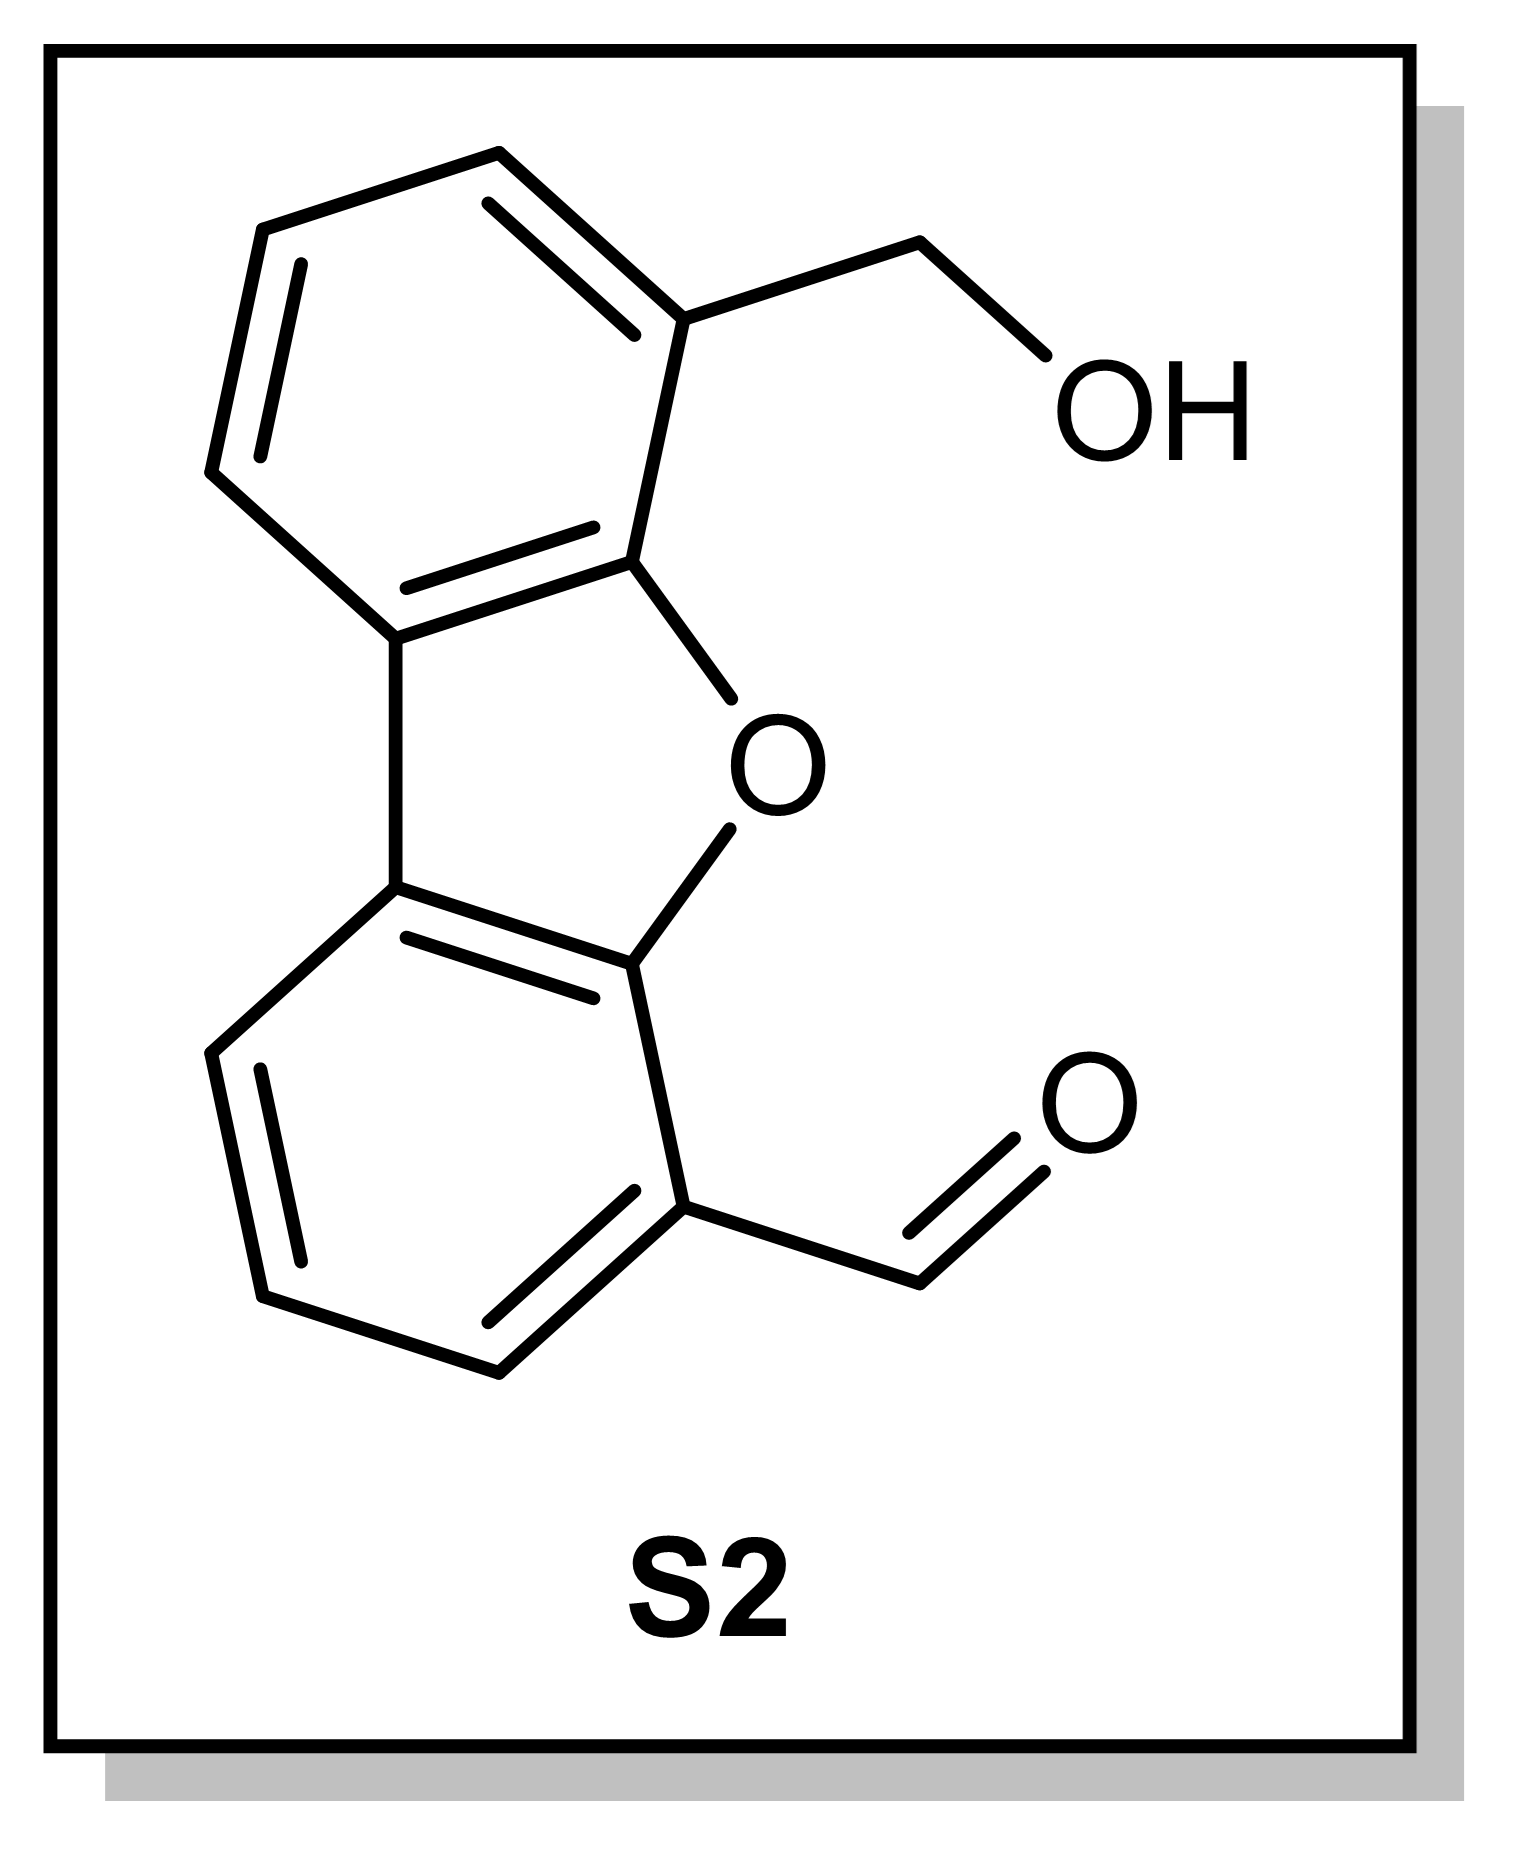
A 1-L round-bottomed flask equipped with a PTFE-coated magnetic stir bar was charged with **S1** (10.0 g, 44.6 mmol, 1.00 equiv.), sodium triacetoxyborohydride (17.0 g, 80.3 mmol, 1.80 equiv.), THF (720 mL) and EtOH (240 mL). The mixture was stirred at 25 ℃ for 75 min, then after the reaction 1 N HCl (9.6 mL) was added to quench the reaction. Then all solvent was removed under reduced pressure and the residue was extracted with H2O (1 × 300 mL) and CH2Cl2 (3 × 250 mL + 1 × 150 mL). The combined organic layers were dried over anhydrous Na2SO4, filtrated and the collected organic layer was evaporated under reduced pressure. The resulting residue was mixed with 40 g of silica gel in CH2Cl2 and dried under reduced pressure to prepare a dry load for flash column chromatography. The mixture was then purified by flash column chromatography with gradient elution of CH2Cl2-acetone mixture (50:1 to 5:1) to afford analytically pure **S2** (5.33 g, 23.6 mmol, 52.8%).

**1H NMR (300 MHz, CDCl3, 23 ℃)**: δ 10.64 (s, 1H, CHO), 8.21 (d, *J* = 7.5 Hz, 1H, ArH), 7.98 (d, *J* = 7.4 Hz, 1H, ArH), 7.94 (d, *J* = 7.3 Hz, 1H, ArH), 7.59 (d, *J* = 6.8 Hz, 1H, ArH), 7.49 (t, *J* = 7.4 Hz, 1H, ArH), 7.42 (t, *J* = 7.4 Hz, 1H, ArH), 5.16 (s, 2H, CH2).

## Synthesis of **S3**


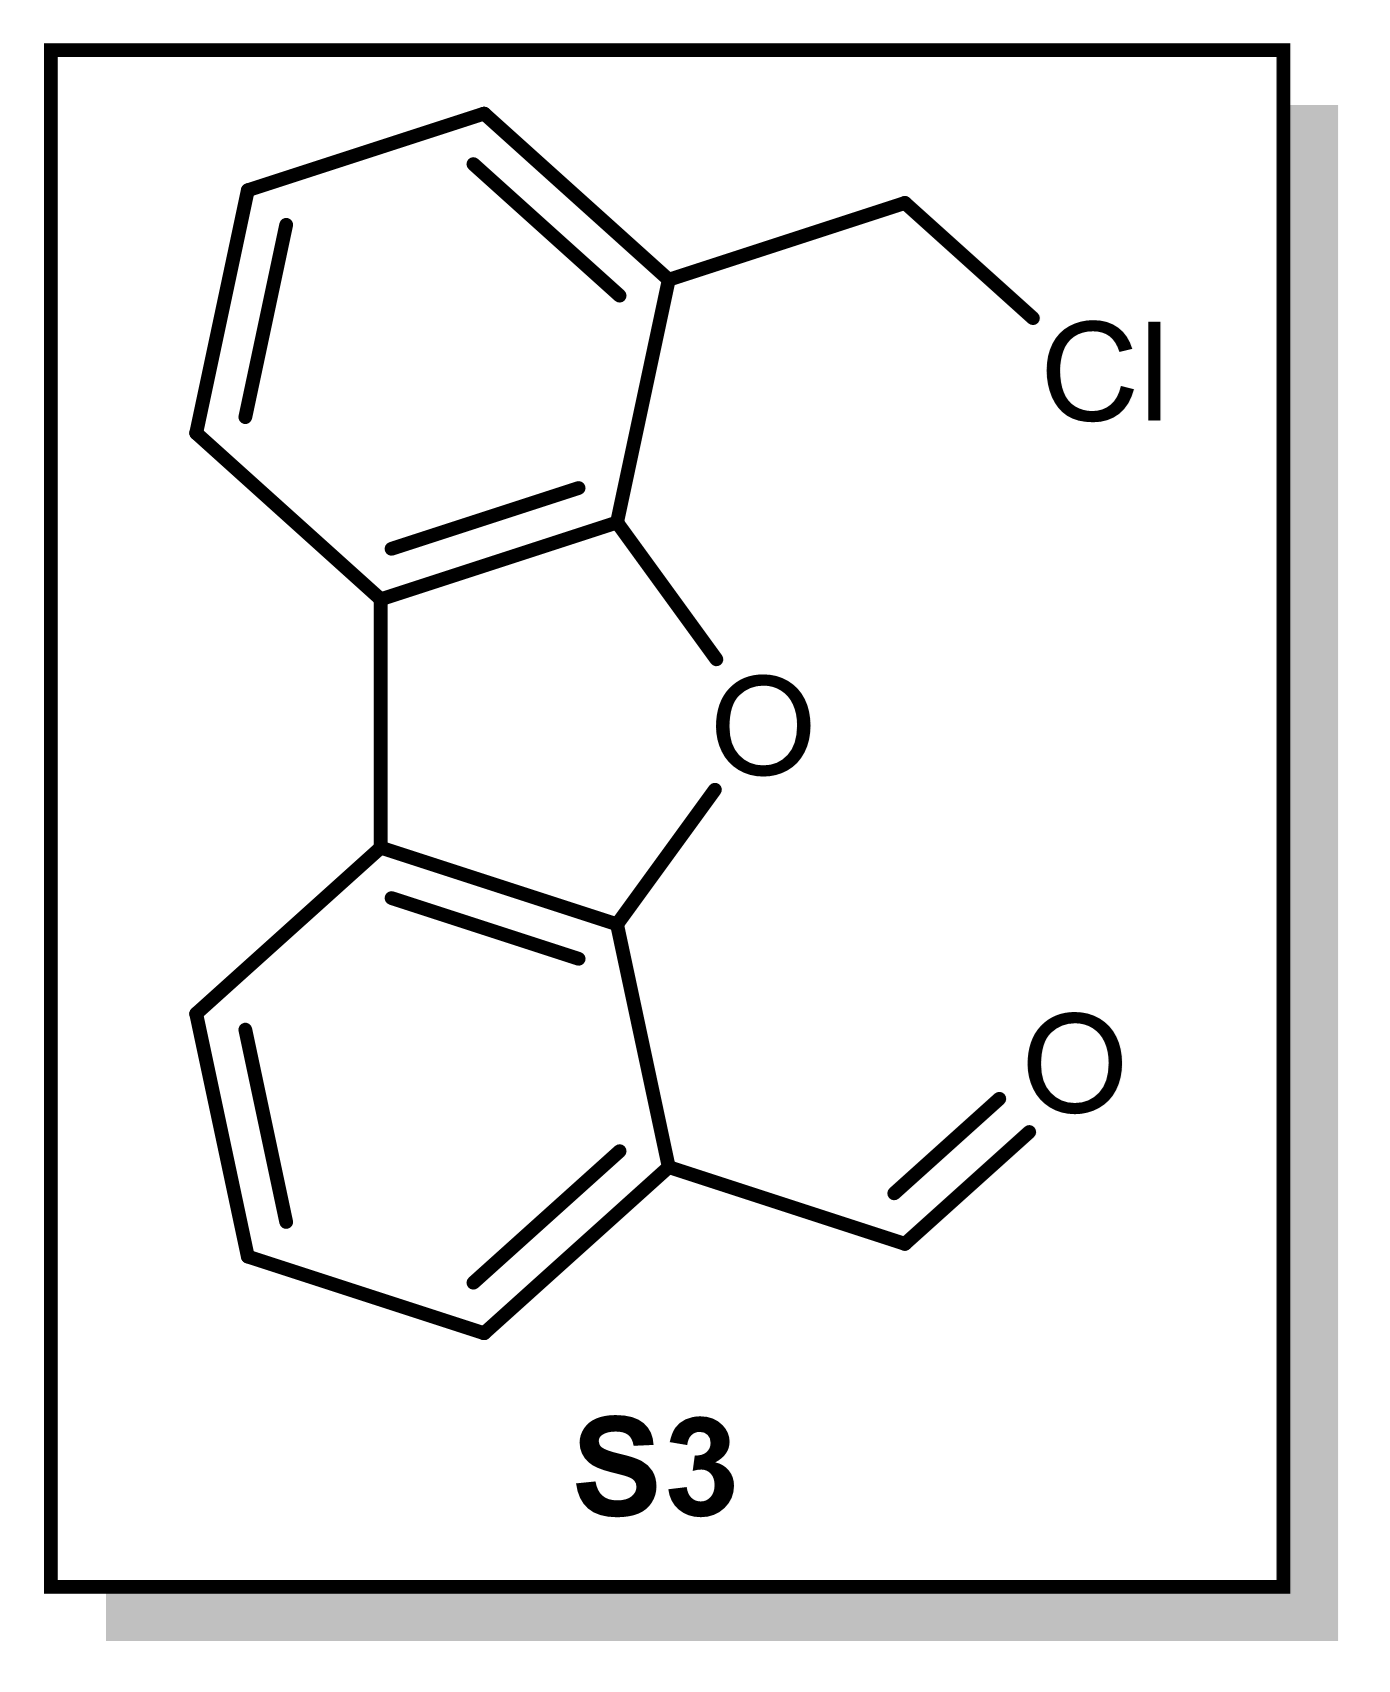
A 250-mL round-bottomed flask equipped with a PTFE-coated magnetic stir bar was charged with **S2** (10.0 g, 44.2 mmol, 1.00 equiv)and CH2Cl2 (150 mL). Triethylamine (12.3 mL, 88.4 mmol, 2.00 equiv) was added to the stirred solution at 25 ℃. After complete dissolution of all solids, methanesulfonyl chloride (6.85 mL, 88.4 mmol, 2.00 equiv) was added dropwise via syringe. During the addition, the solution gradually turned into a dark orange-red color. The reaction mixture was stirred at 25 ℃ for 36 h. The mixture was concentrated under reduced pressure and the residue was subjected to aqueous extraction with H2O (1 × 600 mL) and Et2O (2 × 600 mL + 1 × 350 mL). The combined organic layers were dried over anhydrous Na2SO4, filtered, and dried using rotary evaporator. The crude product was obtained as a brown-yellow solid, then crystallized in hot Et2O (150 mL) to afford **S3** as a bright yellow solid (8.75 g, 35.8 mmol, 81.0%).

**1H NMR (300 MHz, CDCl3, 23 ℃)**:δ 10.69 (s, 1H, CHO), 8.19 (d, *J* = 8.3 Hz, 1H, ArH), 7.99 (d, *J* = 8.3 Hz, 1H, ArH), 7.96 (d, *J* = 7.7 Hz, 1H, ArH), 7.59 (d, *J* = 7.7 Hz, 1H, ArH), 7.49 (t, *J* = 7.4 Hz, 1H, ArH), 7.42 (t, *J* = 7.4 Hz, 1H, ArH), 5.03 (s, 2H, CH2).

## Synthesis of **S4**


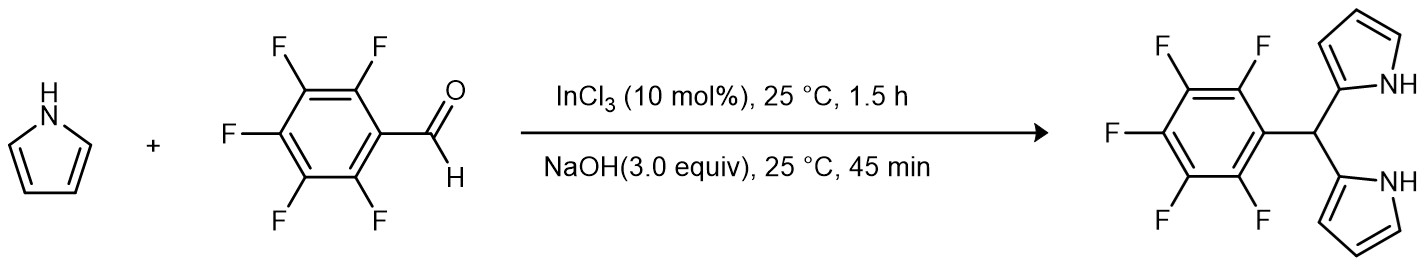


Supplementary Scheme . Synthesis of S4

In an N2 filled glove box, a 250-mL round-bottomed flask equipped with a PTFE-coated magnetic stir bar was first charged with freshly distilled pyrrole (150 mL, 2.16 mol), then added pentafluorobenzaldehyde (5.00 g, 25.5 mmol, 1.00 equiv.) at 25 ℃. After adding InCl3 (564 mg, 2.55 mmol, 0.100 equiv) in one portion, the cloudy mixture was stirred for 90 min. The reaction was quenched by adding NaOH powder (3.06 g, 76.5 mmol, 3.00 equiv.) and stirred for 45 min. Unreacted pyrrole was removed by vacuum distillation and the remaining mixture was filtered under vacuum filtration. Filtrated solid was washed with a small amount of pyrrole (*ca*. 10 mL). The filtrate was concentrated in vacuo to yield a dark green solid, which was left under vacuum overnight to remove remaining pyrrole. Purification by column chromatography over silica gel with elution (CH2Cl2) gave the titled compound **S4** (5.95 g, 19.1 mmol, 74.7%) as an off-white solid.

**1H NMR (300 MHz, CDCl3, 23 ℃)**:δ 8.12 (bs, 2H, NH), 6.73 (m, 2H, C*H*NH), 6.17 (dd, *J* = 5.7, 2.8 Hz, 2H, C*H*CHNH), 6.03 (bs, 2H, C*H*CNH), 5.90 (bs, 1H, C*H*).

## Synthesis of **S5**


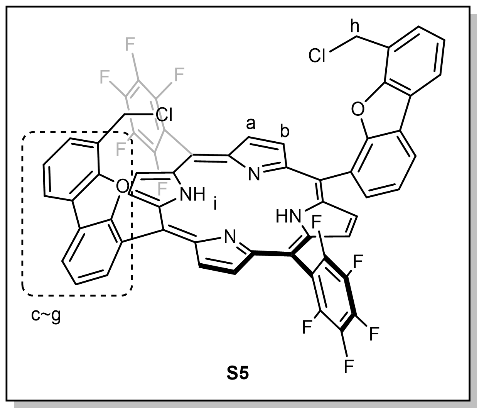
A three-neck 100-mL round-bottomed flask equipped with a PTFE-coated magnetic stir bar was charged with **S4** (1.00 g, 4.08 mmol, 1.00 equiv), **S3** (1.28 g, 4.08 mmol, 1.00 equiv), and anhydrous CH2Cl2 (50 mL) under N2. While stirring the reaction mixture at 0 ℃ under N2, BF3·OEt2 (76 µL, 0.62 mmol, 0.15 equiv) was added dropwise via syringe, and the mixture was stirred for 4 h. Subsequently, 2,3-dichloro-5,6-dicyano-1,4-benzoquinone (1.40 g, 6.12 mmol, 1.50 equiv) was added in one portion, and the reaction mixture was allowed to warm slowly to 25 ℃ while stirring 12 h under N2. The reaction was quenched by adding triethylamine (1.80 mL), followed by stirring for an additional 15 min. The mixture was extracted with CH2Cl2 (250 mL + 2 × 300 mL) and H2O (150 mL). The combined organic layers were dried over anhydrous Na2SO4, filtered and concentrated under reduced pressure. The resulting residue was recovered and mixed with 20 g of silica gel in CH2Cl2 and dried under reduced pressure to prepare a dry load for flash column chromatography and purified by flash column chromatography with elution of hexane-benzene mixture (3:2) to afford analytically pure **S5** (479 mg, 0.447 mmol, 21.9%).

**1H NMR (500 MHz, CDCl3, 23 ℃)**: δ 8.92 (s, 4Ha), 8.80 (s, 4Hb), 8.56 – 8.36 (m, 2Hc), 8.31 (dd, *J* = 24.0, 11.9 Hz, 2Hd), 8.22 – 8.00 (m, 2He), 7.84 (d, *J* = 7.6 Hz, 2Hf), 7.43 (m, 4Hg), 4.46 – 4.02 (m, 4Hh), –2.60 (s, 2Hi).

**13C{1H} NMR (126 MHz, CDCl3, 23 ℃)**: δ 157.1, 155.7, 138.6, 136.6, 132.2, 129.3, 125.4, 124.3, 124.0, 123.1, 122.2, 121.6, 120.1, 116.2, 115.2, 102.4, 67.4, 67.0, 52.4, 51.8.

**19F** **NMR (471 MHz, CDCl3, 23 ℃)**: δ 135.5 (d, *J* = 18.6 Hz, 2F), 136.0 (dd, *J* = 7.2, 24.0 Hz, 2F), 151.0 (t, *J* = 20.7 Hz, 2F), 160.5 (td, *J* = 6.3, 23.2 Hz, 2F), 160.8 (td, *J* = 5.3, 23.1 Hz, 2F).

**Elemental analysis** (calcd., found for C58H26N4O2Cl2F10): C (65.00, 65.07), H (2.45, 2.54), N (5.23, 5.37).

## Synthesis of **L1**


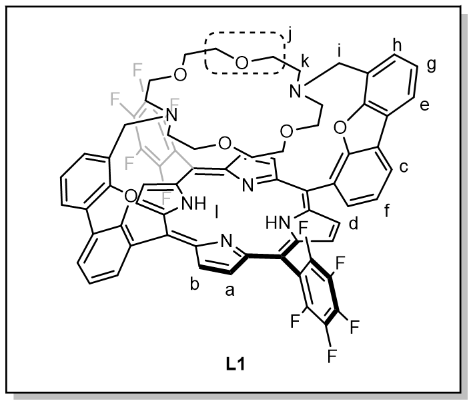
A 250-mL round bottomed flask equipped with a PTFE-coated magnetic stir bar was charged with **S6** (0.50 g, 0.46 mmol, 1.0 equiv), **S7** (0.15 g, 0.56 mmol, 1.2 equiv), K2CO3 (0.65 g, 4.6 mmol, 10 equiv) and CH3CN (80 mL). The reaction mixture was stirred at 80 ℃ for 20 h while protected from light by wrapping the flask with aluminum foils. The reaction mixture was then concentrated under reduced pressure to remove the solvent. The resulting residue was extracted with CH2Cl2 (3 × 150 mL) and H2O (150 mL). The combined organic layers were dried over anhydrous Na2SO4, filtrated and evaporated under reduced pressure. The resulting residue was mixed with 7 g of silica gel in CH2Cl2 and dried under reduced pressure to prepare a dry load for chromatography and purified by flash column chromatography with elution of 1% of triethylamine in EtOAc to afford analytically pure **S8** (295 mg, 0.243 mmol, 50.1%) as a solid.

**1H NMR (500 MHz, CDCl3, 23 ℃)**: δ 8.96 (d, *J* = 4.0 Hz, 4Ha), 8.90 – 8.75 (m, 4Hb), 8.59 (d, *J* = 7.2 Hz, 2Hc), 8.43 (d, *J* = 7.9 Hz, 2Hd), 8.06 (d, *J* = 7.9 Hz, 2He), 7.91 (s, 2Hf), 7.33 (t, *J* = 7.5 Hz, 2Hg), 7.23 (d, *J* = 6.7 Hz, 2Hh), 3.17 (s, 4Hi), 2.01 (s, 16Hj), 0.94 (s, 8Hk), –2.57 (s, 2Hl).

**13C{1H} NMR (126 MHz, CDCl3, 23 ℃)**: δ 157.1, 155.7, 138.6, 136.6, 132.2, 129.3, 125.4, 124.3, 124.0, 123.1, 124.0, 122.2, 121.6, 120.1, 116.2, 115.2, 102.4, 67.4, 67.0, 52.4, 51.6.

**19F** **NMR (471 MHz, CDCl3, 23 ℃)**: δ 135.5 (d, *J* = 18.6 Hz, 2F), 136.0 (dd, *J* = 7.2, 24.0 Hz, 2F), 151.0 (t, *J* = 20.7 Hz, 2F), 160.5 (td, *J* = 6.3, 23.2 Hz, 2F), 160.8 (td, *J* = 5.3, 23.1 Hz, 2F).

**Elemental analysis** (calcd., found for C70H50N6O6F10): C (66.66, 67.25), H (4.00, 4.25), N (6.66, 6.37).


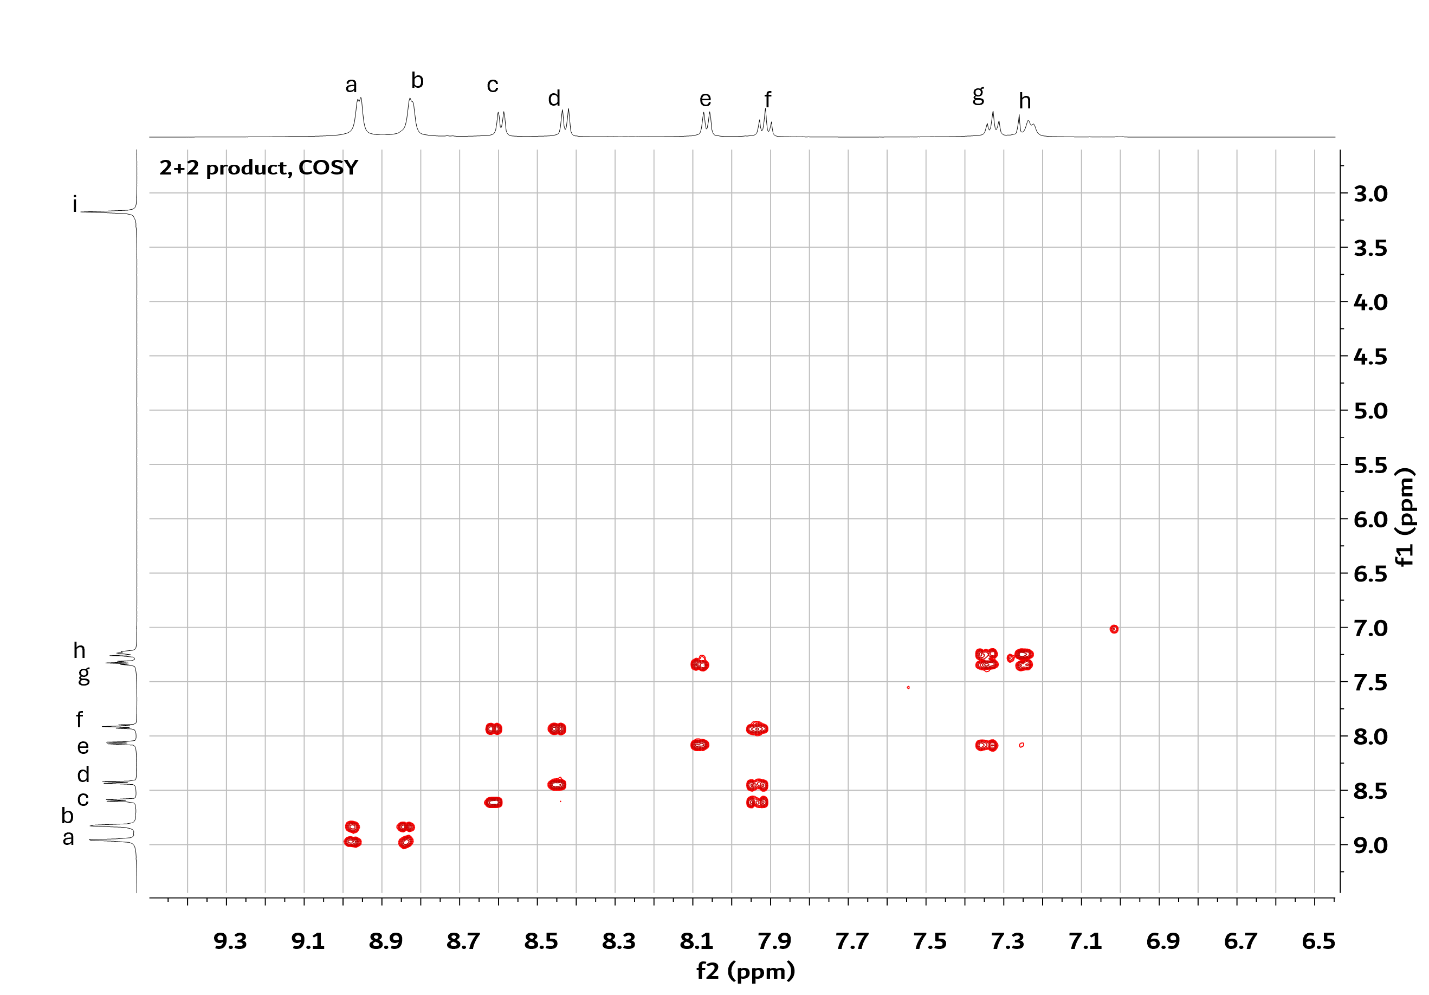


Supplementary Fig 1. Full 1H COSY spectrum (magnitude mode) for L1 taken at 50 min.

## Synthesis of **L2**


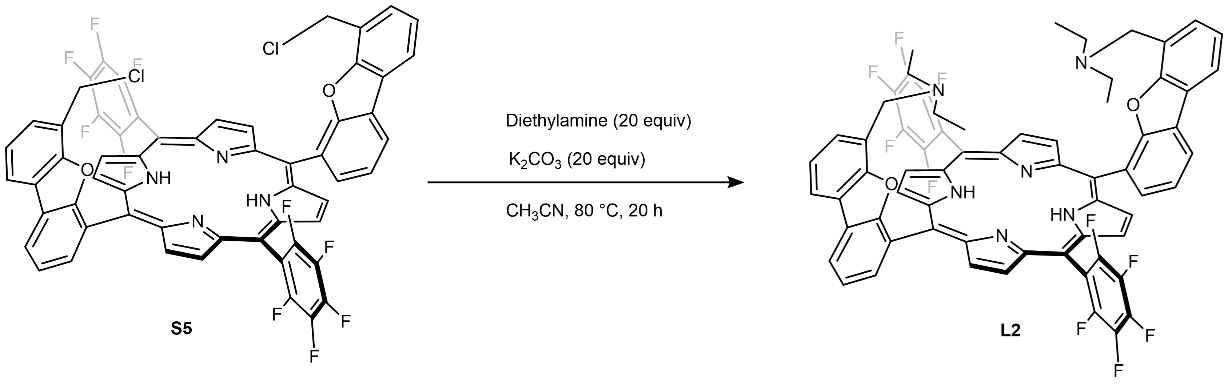


Supplementary Scheme . Synthesis of L2


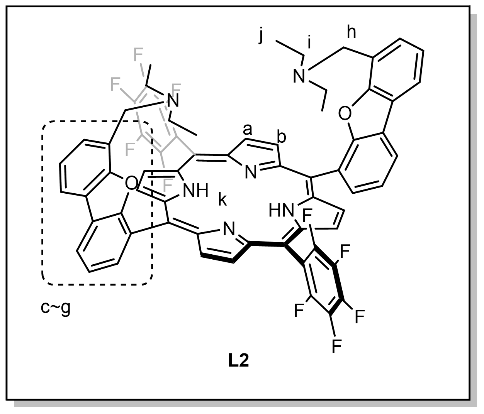
A 50-mL round bottomed flask equipped with a PTFE-coated magnetic stir bar was charged with **S6** (0.1 g, 0.09 mmol, 1 equiv), diethylamine(0.13 g, 1.8 mmol, 20 equiv), K2CO3 (0.25 g, 1.8 mmol, 20 equiv), and CH3CN (20 mL). The mixture was stirred at 80 ℃ for 20 h while protected from light by wrapping the flask in aluminum foil. The reaction mixture was then concentrated under reduced pressure to remove the solvent. The resulting residue was extracted with CH2Cl2 (3 × 30 mL) and H2O (30 mL). The combined organic layers were dried over anhydrous Na2SO4, filtrated and evaporated under reduced pressure. The resulting residue was mixed with 1.0 g of silica gel in CH2Cl2 and dried under reduced pressure to prepare a dry load for flash column chromatography and purified by chromatography with elution of 1% of triethylamine in EtOAc to afford analytically pure **L2** (49 mg, 0.043 mmol, 48%).

**1H NMR (500 MHz, CDCl3, 23 ℃)**: δ 8.91 (d, *J* = 4.9 Hz, 4Ha), 8.76 (d, *J* = 5.0 Hz, 4Hb), 8.43 (d, *J* = 7.8 Hz, 2Hc), 8.25 (t, *J* = 6.5 Hz, 2Hd), 8.09 (d, *J* = 7.2 Hz, 2He), 7.81 (t, *J* = 7.6 Hz, 2Hf), 7.54 – 7.33 (m, 4Hg), 3.22 (s, 4Hh), 2.16 – 1.99 (m, 8Hi), 0.43 (dt, *J* = 13.4, 7.0 Hz, 13Hj), –2.65 (s, 2Hk).

## Synthesis of **T*p*OMePP**


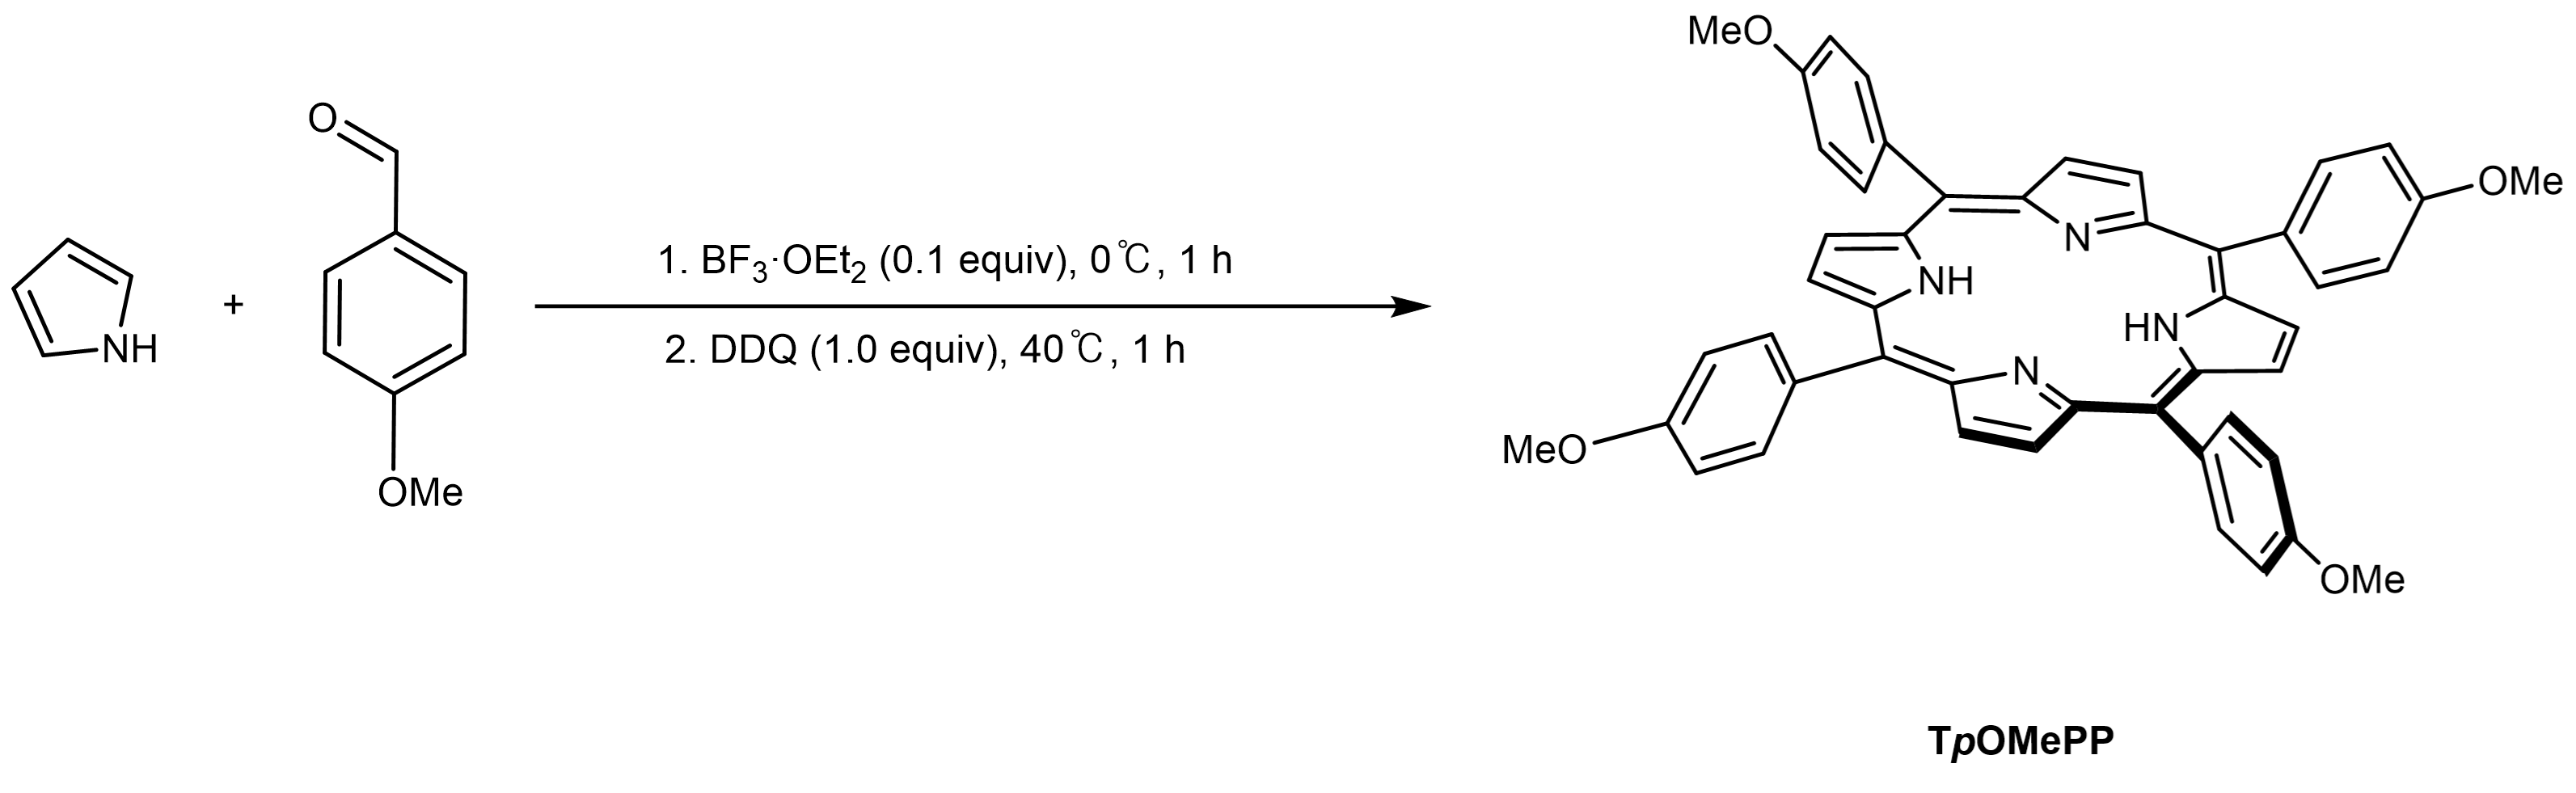


Supplementary Scheme . Synthesis of T*p*OMePP


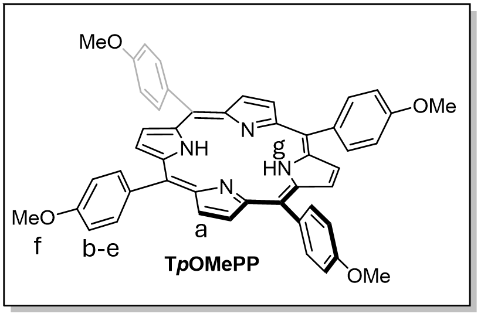
A three-neck 500-mL round bottomed flask equipped with a PTFE-coated magnetic stir bar was charged with pyrrole(0.21 mL, 3.0 mmol, 1.0 equiv), *p*-methoxybenzaldehyde(0.37 mL, 3.0 mmol, 1.0 equiv), and anhydrous CH2Cl2 (300 mL) under N2. While stirring the reaction mixture at 0 ℃ under N2, BF3·OEt2 (38 µL, 0.30 mmol, 0.10 equiv) was added dropwise via syringe and the mixture was stirred for an hour. Subsequently, 2,3-dichloro-5,6-dicyano-1,4-benzoquinone (0.68 g, 3.0 mmol, 1.0 equiv) was added in one portion, and the reaction mixture was reflux at 40 ℃ for an hour. The reaction was quenched with 1 N NaOH solution (150 mL) and extracted with H2O (150 mL). The combined organic layers were dried over anhydrous Na2SO4, filtered and concentrated under reduced pressure. Then the resulting residue was purified by flash column chromatography over silica gel with elution of CHCl3 and CH2Cl2 mixture (1:6) to afford analytically pure **T*p*OMePP** (93 mg, 0.13 mmol, 8.4%) as a solid.

**1H NMR (500 MHz, CDCl3, 23 ℃)**: δ 8.89 (s, 8Ha), 8.16 (d, *J* = 2.0 Hz, 4Hb), 8.15 (d, *J* = 2.1 Hz, 4Hc), 7.32 (d, *J* = 2.0 Hz, 4Hd), 7.31 (d, *J* = 2.1 Hz, 4He), 4.13 (s, 12Hf), –2.72 (s, 2Hg).

## Synthesis of **TF20PP**


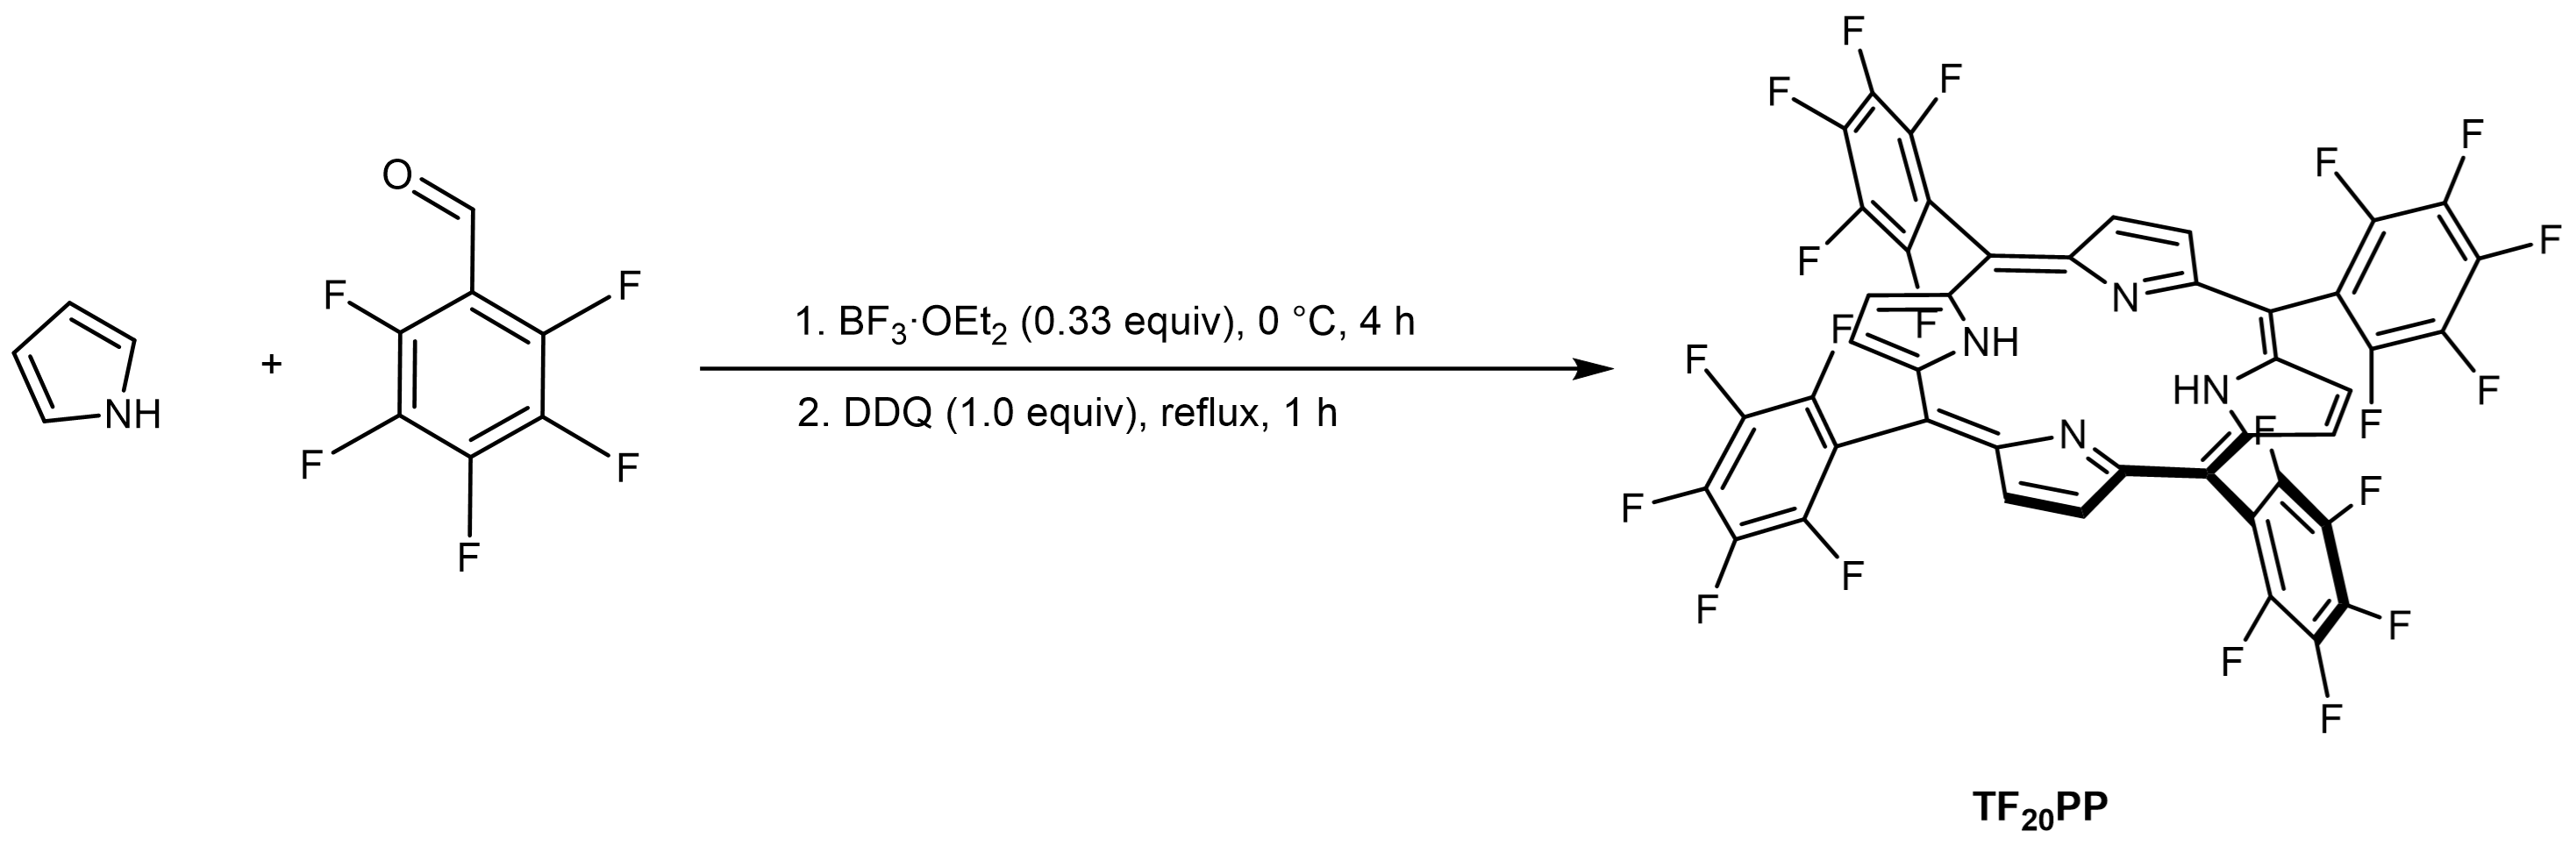


Supplementary Scheme . Synthesis of TF20PP


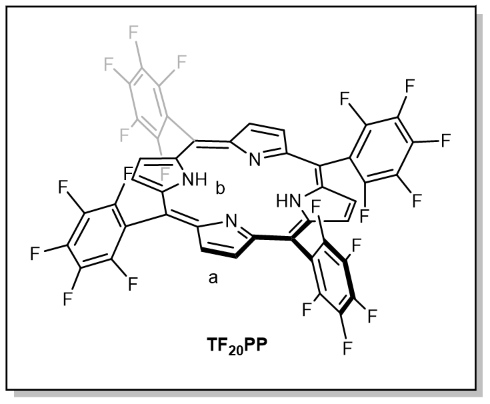
A three-neck 500-mL round bottomed flask equipped with a PTFE-coated magnetic stir bar was charged with pyrrole(0.35 mL, 5.1 mmol, 1.0 equiv), pentafluorobenzaldehyde(1.0 g, 5.1 mmol, 1.0 equiv), and anhydrous CH2Cl2 (240 mL) under N2. While stirring the reaction mixture at 0 ℃, BF3·OEt2 (210 µl, 1.7 mmol, 0.33 equiv) was added dropwise via syringe and the reaction mixture was stirred and heated to reflux for 4 h. Then 2,3,5,6-tetrachloro-1,4-benzoquinone (1.3 g, 5.1 mmol, 1.0 equiv) was added in one portion to the reaction mixture and heated to reflux for 1 h. The reaction was quenched with 1 N NaOH solution (150 mL) and extracted with H2O (150 mL). The combined organic layers were dried over anhydrous Na2SO4, filtered and concentrated under reduced pressure. Then the resulting residue was purified by flash column chromatography over silica gel with elution of *n*-hexane and CH2Cl2 mixture (1:6) to afford analytically pure **TF20PP** (470 mg, 0.49 mmol, 19%) as a solid.

**1H NMR (300 MHz, CDCl3, 23 ℃)**: δ 8.95 (s, 8Ha), –2.90 (s, 2Hb).

## Synthesis of **TF10PP**


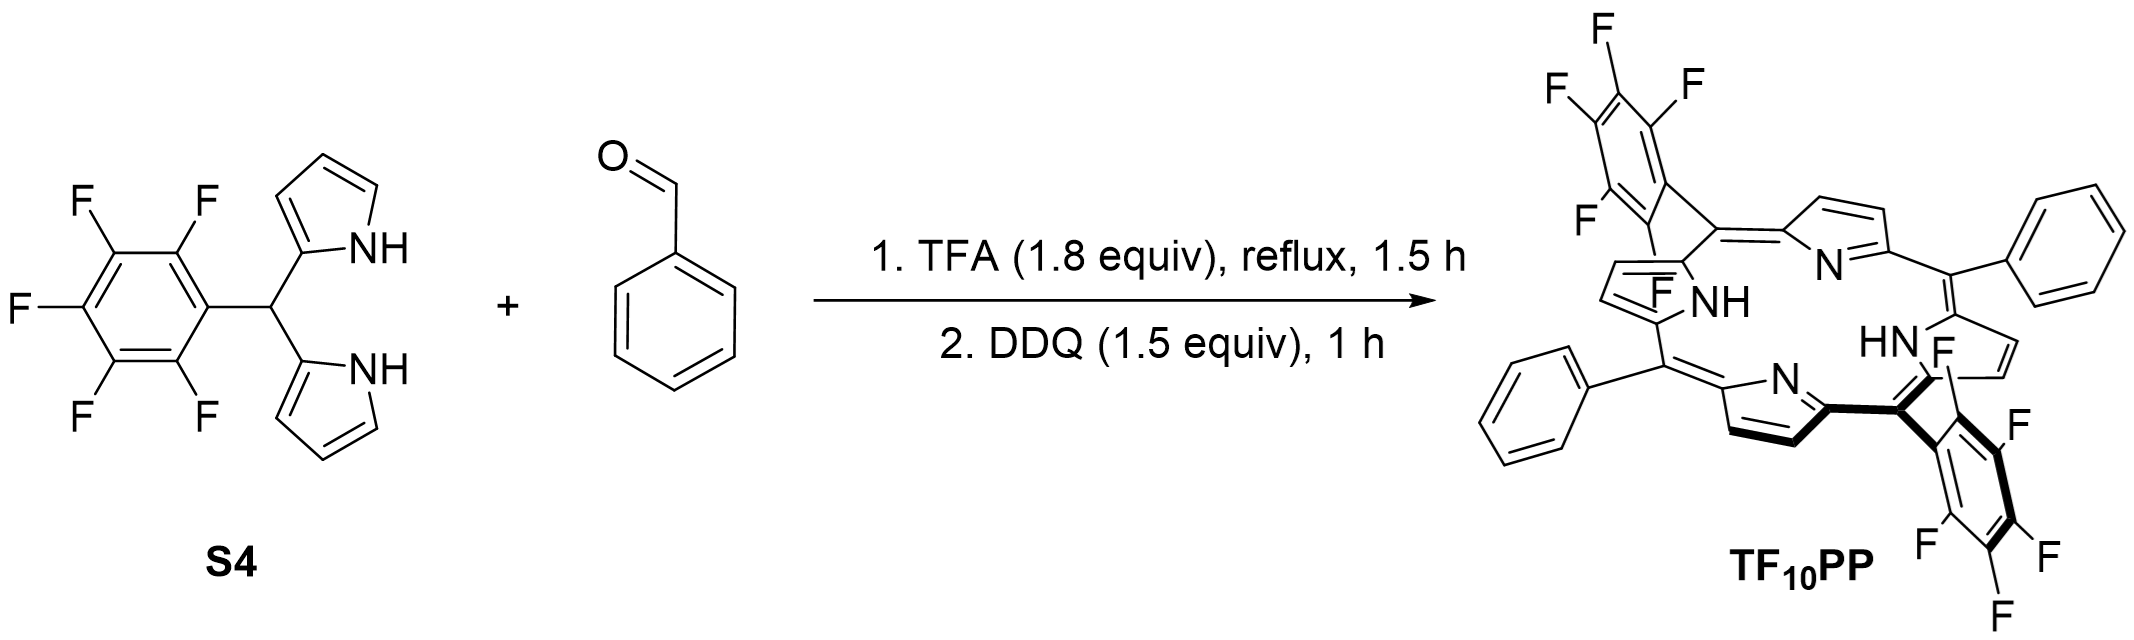


Supplementary Scheme . Synthesis of TF10PP


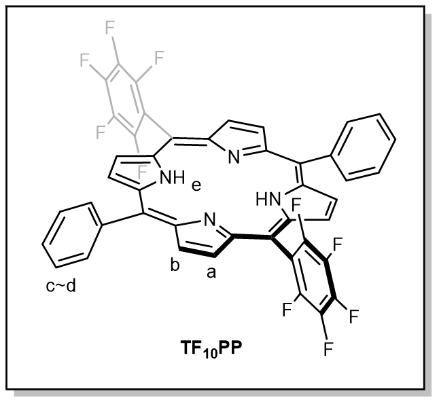
A three-neck 100-mL round bottomed flask equipped with a PTFE-coated magnetic stir bar was charged with benzaldehyde(50 mg, 0.50 mmol, 1.0 equiv), **S5** (0.16 g, 0.50 mmol, 1.0 equiv), and anhydrous CH2Cl2 (50 mL) under N2. While stirring the reaction mixture, trifluoroacetic acid (69 µL, 0.90 mmol, 1.8 equiv) was added and the mixture was reflux at 40 ℃ for 90 min. Then 2,3-dichloro-5,6-dicyano-1,4-benzoquinone (0.17 g, 0.75 mmol, 1.5 equiv) was added in one portion, and the reaction mixture was stirred for an hour. The reaction was quenched with triethylamine (0.50 mL) and stirred for 15 min. The mixture was extracted with CH2Cl2 (250 mL + 2 × 300 mL) and H2O (150 mL). The combined organic layers were dried over anhydrous Na2SO4, filtered and concentrated under reduced pressure. The resulting residue was recovered and purified by flash column chromatography over silica gel with elution of *n*-pentane-CH2Cl2 mixture (3:1) to afford analytically pure **TF10PP** (46 mg, 0.058 mmol, 23%) as a solid.

**1H NMR (500 MHz, C6D6, 23 ℃)**: δ 8.98 (d, *J* = 4.9 Hz, 4Ha), 8.83 (d, *J* = 4.9 Hz, 4Hb), 8.25 (dd, *J* = 7.6, 1.8 Hz, 4Hc), 7.87 – 7.73 (m, 6Hd), –2.81 (s, 2He).

## Synthesis of **ZnL1**


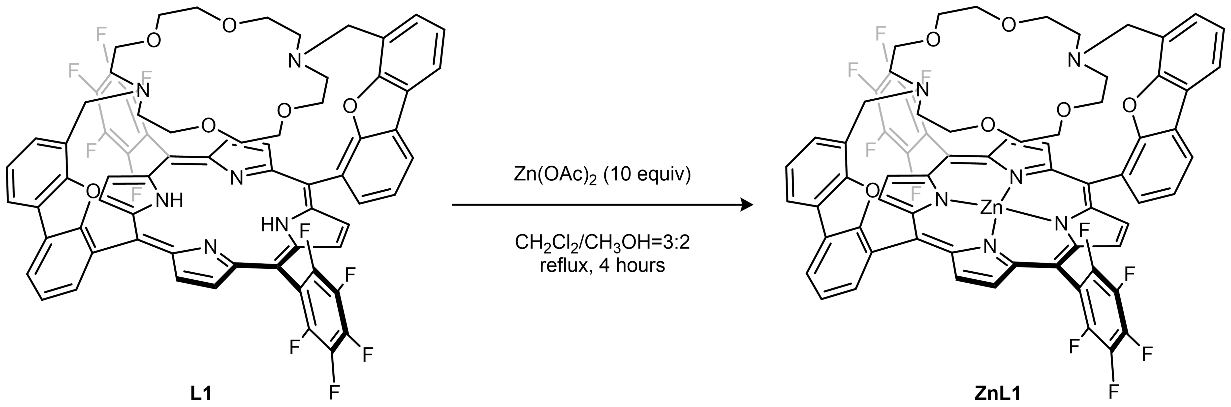


Supplementary Scheme . Synthesis of ZnL1


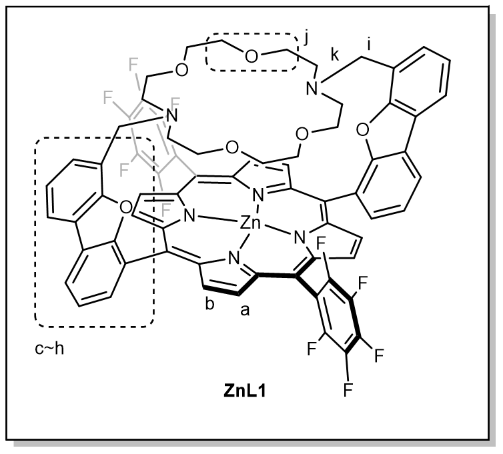
In a 20 mL vial equipped with a PTFE-coated magnetic stir bar was charged with **S8** (80 mg, 60 µmol, 1.0 equiv), zinc acetate (118 mg, 600 µmol, 10.0 equiv) and CH2Cl2 (9 mL)/CH3OH (6 mL) mixture. The reaction was heated at 65 ℃ for 4 h, during which the color changed from dark purple to pink-purple. After removal of volatiles under reduced pressure, the resulting pink residue was filtered through a plug of silica gel, eluting with a 2:3 mixture of *n*-hexane and EtOAc with 2% of triethylamine. The solvent was evaporated, and the residue was washed sequentially with *n*-hexane (3 × 5 mL) and Et2O (3 × 5 mL). A dark pink powdery solid of **ZnL1** (72 mg, 50 µmol, 87%) was obtained. Pink crystals suitable for X-ray diffraction were obtained by slow evaporation in a mixture of *n*-hexane, CH2Cl2, and Et2O.

**1H NMR (500 MHz, CD3CN, 23 ℃)**: δ 8.98 (d, *J* = 4.6 Hz, 4Ha), 8.94 (d, *J* = 4.8 Hz, 4Hb), 8.67 (d, *J* = 7.3 Hz, 2Hc), 8.50 (d, *J* = 7.9 Hz, 2Hd), 8.13 (d, *J* = 7.9 Hz, 2He), 7.94 (t, *J* = 7.7 Hz, 2Hf), 7.30 (t, *J* = 7.6 Hz, 2Hg), 7.14 (d, *J* = 7.3 Hz, 2Hh), 2.99 (s, 4Hi), 1.89 – 1.53 (m, 16Hj), 0.96 (s, 8Hk).

**13C{1H} NMR (126 MHz, CDCl3, 23 ℃)**: δ 157.5, 155.3, 150.9, 149.5, 133.1, 132.1, 130.0, 127.1, 125.5, 124.7, 123.4, 122.7, 121.7, 120.8, 115.3, 102.3, 67.9, 51.8, 30.4, 29.7.

**HRMS (ESI/Q-TOF)** m/z: [M]+ Calcd. for C70H48F10N6O6Zn 1322.2767; found 1323.2777

## Synthesis of **ZnL1-CN_K**


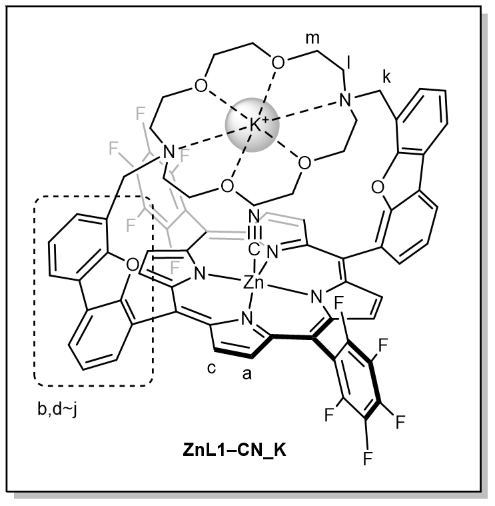
In a 20 mL vial equipped with a PTFE-coated magnetic stir bar were charged with **ZnL1**(17 mg, 13 µmol, 1.0 equiv), potassium cyanide (13 mg, 190 µmol, 15 equiv) and chlorobenzene (10 mL). The reaction mixture was stirred at 40 ℃ for 6 h, during which the color changed from pink to blue-purple. Upon completion, the reaction mixture was filtered to remove excess KCN salts, and the volatiles were removed under reduced pressure. The resulting residue was washed with *n*-hexane (3 × 5 mL) and Et2O (3 × 5 mL). A dark blue-pink powdery solid of **ZnL1–CN_K** (12 mg, 8.6 µmol, 66%) was obtained. Purple crystals suitable for X-ray diffraction were obtained by slow evaporation in a mixture of CH2Cl2 and Et2O.

**1H NMR (500 MHz, CDCl3, 23 ℃)**: δ 8.79 (d, *J* = 4.5 Hz, 4Ha), 8.74 (d, *J* = 7.2 Hz, 2Hb), 8.59 (d, *J* = 4.4 Hz, 4Hc), 8.31 (d, *J* = 7.9 Hz, 2Hd), 7.89 (dd, *J* = 8.7, 5.3 Hz, 4He), 7.35 (d, *J* = 7.9 Hz, 1Hf), 7.30 (t, *J* = 7.5 Hz, 1Hg), 7.05 (t, *J* = 7.3 Hz, 2Hh), 6.60 (d, *J* = 6.6 Hz, 2Hi), 2.92 (s, 4Hj), 2.51 (s, 4Hk), 2.41 (s, 8Hl), 1.84 (s, 12Hm).

**13C{1H} NMR (126 MHz, CDCl3, 23 ℃)**: δ 157.2, 155.9, 151.0, 149.5, 132.8, 132.7, 129.6, 129.3, 128.4, 125.7, 124.3, 124.0, 123.1, 122.8, 121.7, 120.5 120.0, 114.7, 66.8 66.2, 52.5, 51.8, 30.5 29.9

## Synthesis of **ZnL2**


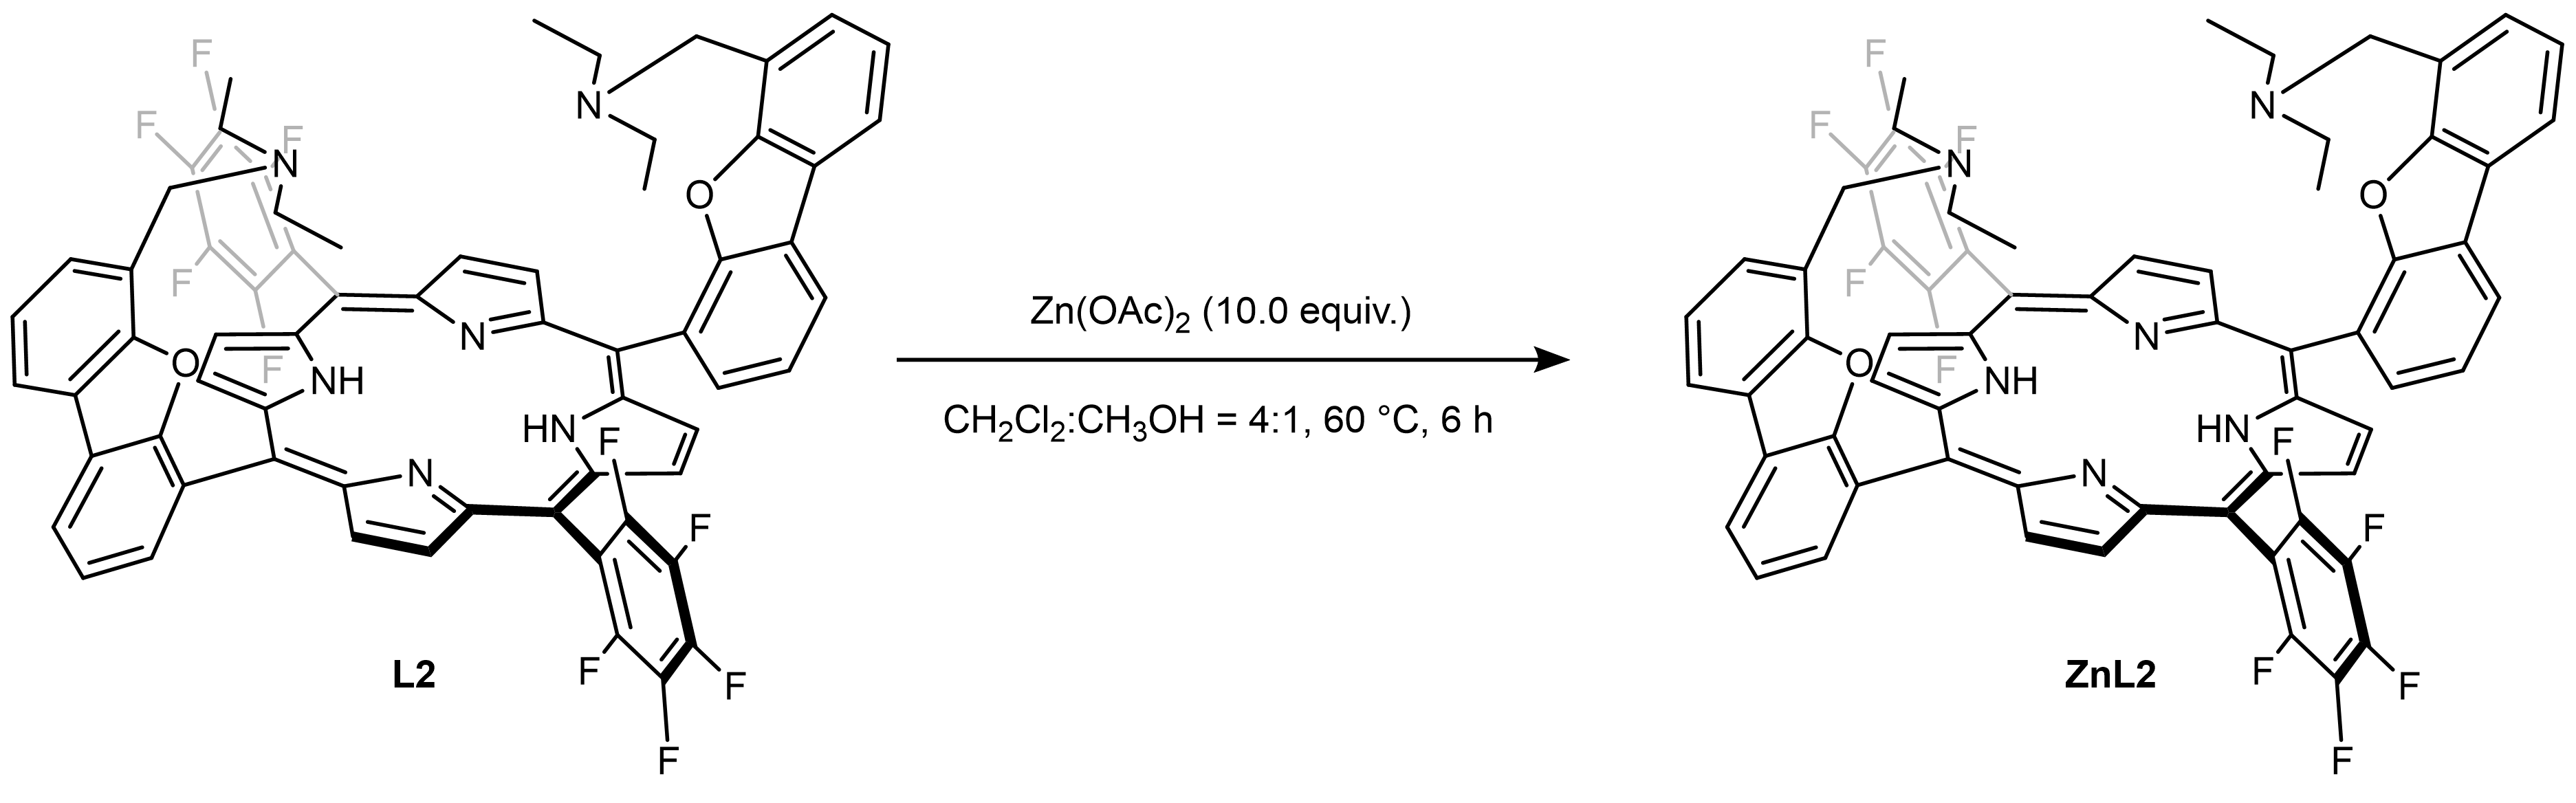


Supplementary Scheme . Synthesis of ZnL2


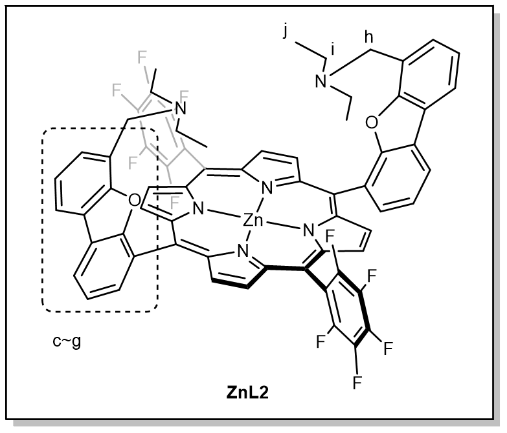
In a 20 mL vial equipped with a PTFE-coated magnetic stir bar were charged with **L2** (69 mg, 0.060 mmol, 1.0 equiv), zinc acetate (118 mg, 60.0 µmol, 10.0 equiv) and CH2Cl2 (12 mL)/CH3OH (3 mL) mixture. The reaction was heated at 60 ℃ for 6 h, during which the color changed from dark purple to pink-purple. After removal of volatiles under reduced pressure, the resulting pink residue was filtered through a plug of silica gel, eluting with a 1:1 mixture of *n*-hexane and EtOAc with 1% of triethylamine. The solvent was evaporated, and the residue was washed with *n*-hexane (3 × 5 mL) and Et2O (3 × 5 mL). A dark pink powder of **ZnL2** (48 mg, 40 µmol, 67%) was obtained.

**1H NMR (500 MHz, CDCl3, 23 ℃)**: δ 8.96 (dd, *J* = 7.8, 4.7 Hz, 4Ha), 8.82 (t, *J* = 4.8 Hz, 4Hb), 8.40 (dd, *J* = 7.9, 3.4 Hz, 2Hc), 8.24 (t, *J* = 7.8 Hz, 2Hd), 8.14 – 8.04 (m, 2He), 7.85 – 7.73 (m, 2Hf), 7.46 – 7.31 (m, 4Hg), 3.12 (d, *J* = 32.5 Hz, 4Hh), 1.94 (d, *J* = 29.4 Hz, 8Hi), 0.27 (d, *J* = 38.0 Hz, 12Hj).

**HRMS (ESI/Q-TOF)** m/z: [M]+ Calcd. for C66H44F10N6O2Zn 1145.; found 1145.53352

## Synthesis of **ZnTF10PP**


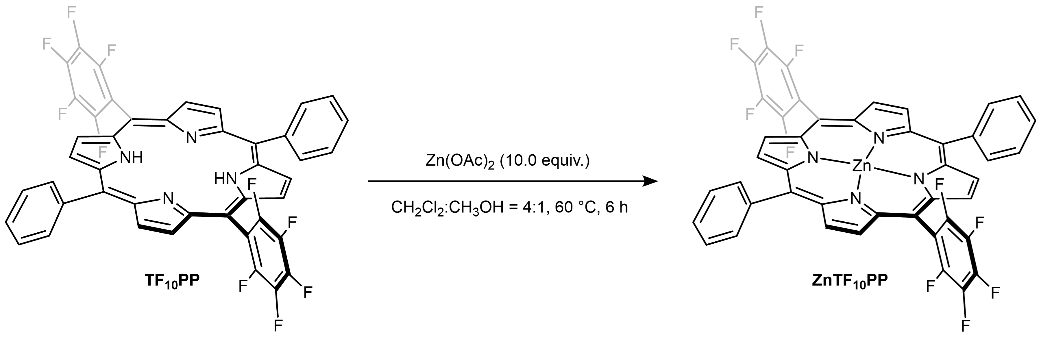


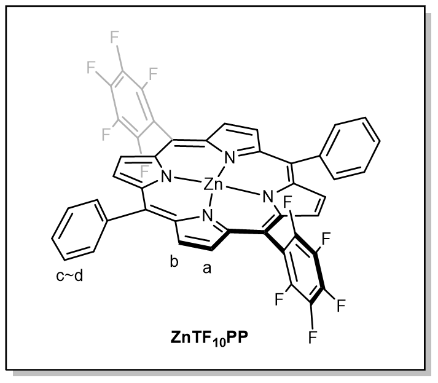
Supplementary Scheme . Synthesis of ZnTF10PP

In a 20 mL vial equipped with a PTFE-coated magnetic stir bar were charged **TF10PP** (50 mg, 60 µmol, 1.0 equiv), zinc acetate (120 mg, 630 µmol, 10 equiv) and a CH2Cl2 (12 mL)/CH3OH (3 mL) mixture. The reaction was heated at 60 ℃ for 6 h, during which the color changed from dark purple to pink. After removal of volatiles under reduced pressure, the resulting pink residue was filtered through a plug of silica gel, eluting with a 1:1 mixture of *n-*hexane and EtOAc with 1% of triethylamine. The solvent was evaporated, and the residue was washed with *n-*hexane (3 × 5 mL) and Et2O (3 × 5 mL). A dark pink powdery solid of **ZnTF10PP** (36 mg, 40 µmol, 67%) was obtained.

**1H NMR (500 MHz, C6D6, 23 ℃)**:1H NMR (300 MHz, Chloroform-*d*) δ 9.05 (d, *J* = 4.7 Hz, 4Ha), 8.89 (d, *J* = 4.7 Hz, 4Hb), 8.33 – 8.14 (m, 4Hc), 7.89 – 7.66 (m, 6Hd).

## Synthesis of **FeL1–Cl**


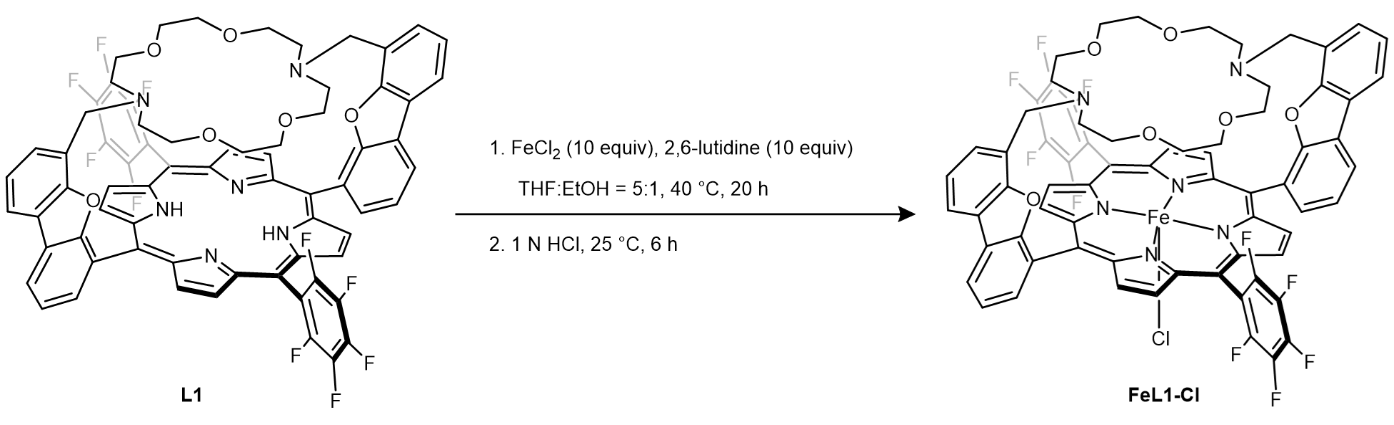


Supplementary Scheme . Synthesis of FeL1–Cl

In an N2 filled glove box, a 20 mL vial equipped with a PTFE-coated magnetic stir bar was charged with **L1** (63 mg, 50 µmol, 1.0 equiv), FeCl2 (63 mg, 0.50 mmol, 10 equiv) and 2,6-lutidine (54 mg, 0.50 mmol, 10 equiv) with a mixture of THF/EtOH in a 5:1 ratio. The reaction was heated at 40 ℃ for 20 h, which the color changed from dark purple to red-purple. Then the reaction mixture was exposed to air, and the solution turned brown. 25 mL of 1 N HCl was added to the reaction mixture and stirred at 25 ℃ for 6 h. The resulting residue was extracted with CH2Cl2 (3 × 50 mL). The combined organic layers were dried over anhydrous Na2SO4, filtered, and concentrated under reduced pressure. The residue was washed with *n*-hexane (3 × 5 mL) and Et2O (3 × 5 mL) to afford **FeL1–Cl** as a dark brown solid (48 mg, 36 µmol, 72%). The product was characterized by UV-vis spectroscopy and HRMS.

**HRMS (ESI/Q-TOF)** m/z: [M]+ Calcd. for C34H41N3 492.3378; found 492.3373.

**UV-vis (CH2Cl2)**: 361 nm (ε = 4.36×104 L mol–1 cm–1), 416 nm (ε = 9.41×104 L mol–1 cm–1), 506 nm (ε = 8.98×103 L mol–1 cm–1), 642 nm (ε = 2.73×103 L mol–1 cm–1)

## Synthesis of **FeL1–Im2**


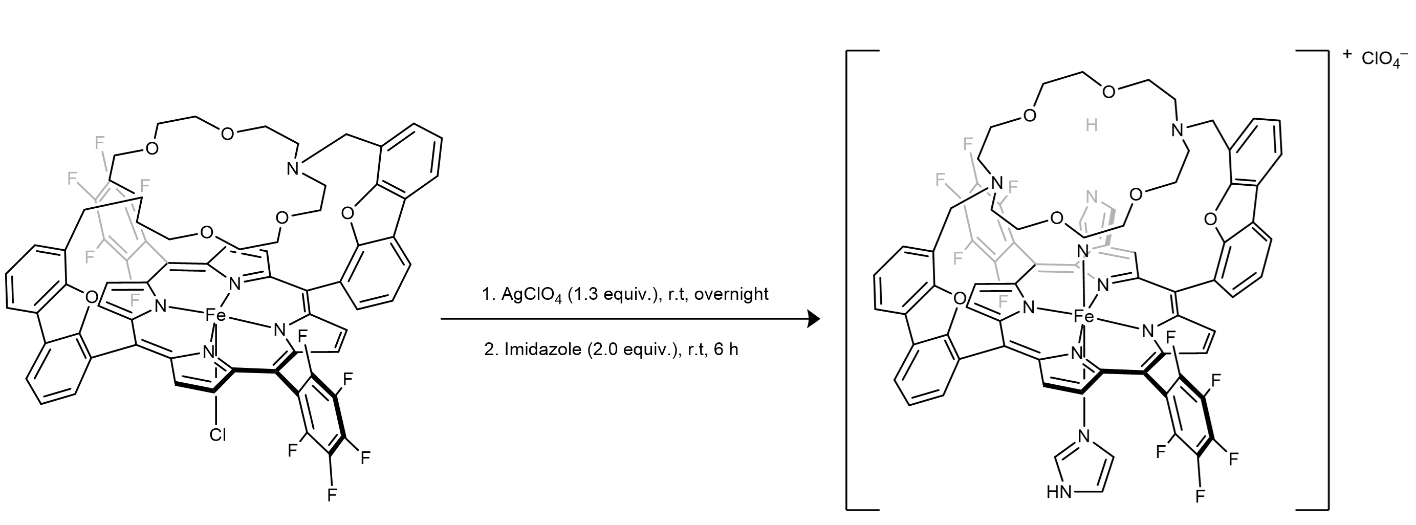


Supplementary Scheme . Synthesis of FeL1–Im2

In an N2 filled glove box, a 20 mL vial equipped with a PTFE-coated magnetic stir bar was charged with **FeL1–Cl** (63 mg, 50 µmol, 1.0 equiv), AgClO4 (14 mg, 65 µmol, 1.3 equiv) and CH2Cl2 (4.0 mL). The reaction was stirred at 25 ℃ for overnight. Then imidazole (9 mg, 0.1 mmol, 2 equiv) was added to the reaction mixture and stirred at 25 ℃ for 6 hours. The reaction mixture was filtered with glass fiber to remove excess AgClO4 and AgCl salts, and collected organic layers were concentrated under reduced pressure. The dark brown solid of **FeL1–Im2** (38 mg, 26 µmol, 56%) was obtained. Red crystals suitable for X-ray diffraction were obtained by slow evaporation in CH2Cl2 and checked by UV-vis and NMR.

**1H NMR (500 MHz, CDCl3, 23 ℃)**:δ 9.89 (s, 1Ha), 7.99 (d, *J* = 8.5 Hz, 1Hb), 7.36 (d, *J* = 8.6 Hz, 1Hc), 7.34 – 7.29 (m, 1Hg), 7.26 (d, *J* = 7.6 Hz, 2Hg'), 7.12 (d, *J* = 7.3 Hz, 3Hg''), 6.96 (t, *J* = 8.0 Hz, 1He), 6.62 (d, *J* = 8.3 Hz, 1Hd), 6.13 (d, *J* = 7.6 Hz, 1Hf), 3.90 (sep, *J* = 6.6 Hz, 2Hh), 3.34 (sep, *J* = 6.7 Hz, 2Hh'), 1.50 (d, *J* = 6.6 Hz, 6Hi), 1.29 (d, *J* = 6.8 Hz, 12Hi''), 1.10 (d, *J* = 6.9 Hz, 6Hi''').

**HRMS (ESI/Q-TOF)** m/z: [M+H]+ Calcd. for C34H41N3 492.3378; found 492.3373

**UV-vis (CH2Cl2)**: 415 nm (ε = 7.70×104 L mol–1 cm–1), 549 nm (ε = 6.68×103 L mol–1 cm–1)

## Synthesis of **FeT*p*OMePP–Cl**


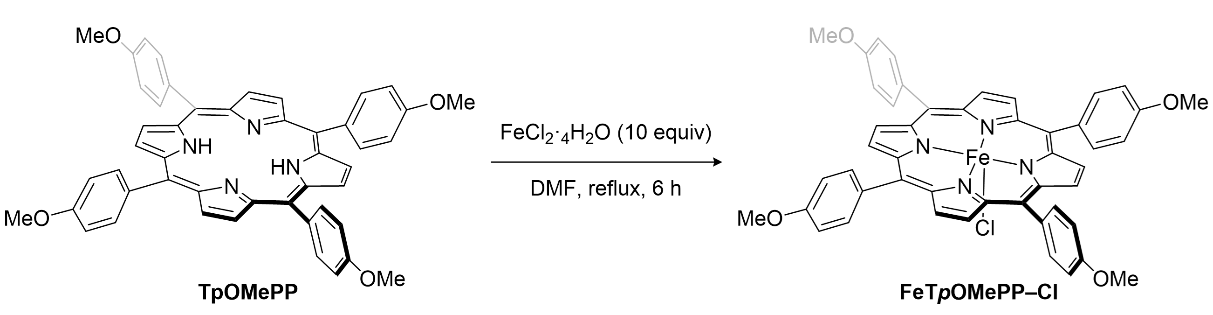


Supplementary Scheme . Synthesis of FeT*p*OMePP–Cl

In an N2 filled glove box, a 20 mL vial equipped with a PTFE-coated magnetic stir bar was charged with **T*p*OMePP** (68 mg, 68 µmol, 1.0 equiv), FeCl2.4H2O (140 mg, 0.68 mmol, 10 equiv), and DMF (5 mL). The reaction was heated to reflux for 6 hours. Then the reaction mixture was diluted with CHCl3 (30 mL), the solution was washed with 25 mL of 1 N HCl and the mixture was extracted with CH2Cl2 (3 × 50 mL). The combined organic layers were dried over anhydrous Na2SO4, filtered and the organic layers were concentrated under reduced pressure. The resulting residue was washed with *n*-hexane (3 × 5 mL) and Et2O (3 × 5 mL) the dark brown powdery solids of **FeT*p*OMePP–Cl** (48 mg, 58 µmol, 86%) was obtained and checked by UV-vis and HRMS.

**HRMS (ESI/Q-TOF)** m/z: [M+H]+ Calcd. for C48H36ClN4O4Fe 823.1769; found 823.1688

## Synthesis of **FeTF10PP–Cl**


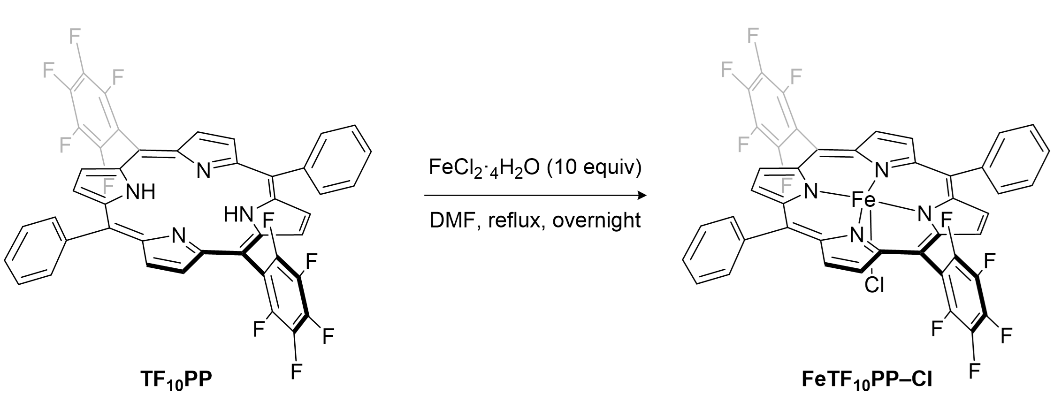


Supplementary Scheme . Synthesis of FeTF10PP–Cl

In an N2 filled glove box, a 20 mL vial equipped with a PTFE-coated magnetic stir bar was charged with **TF10PP** (49 mg, 50 µmol, 1.0 equiv), FeCl2.4H2O (99 mg, 0.50 mmol, 10 equiv), and DMF (5 mL). The reaction was heated to reflux for overnight. Then the reaction mixture was diluted with CHCl3 (30 mL), the solution was washed with 25 mL of 1 N HCl and the mixture was extracted with CH2Cl2 (3 × 50 mL). The combined organic layers were dried over anhydrous Na2SO4, filtered and the organic layers were concentrated under reduced pressure. The resulting residue was washed with *n*-hexane (3 × 5 mL) and Et2O (3 × 5 mL) the dark brown powdery solids of **FeTF10PP–Cl** (38 mg, 45 µmol, 89%) was obtained and checked by UV-vis and HRMS.

**HRMS (ESI/Q-TOF)** m/z: [M+H]+ Calcd. for C44H18F10N4Fe 849.0794; found 849.0782

## Synthesis of **FeTF20PP–Cl**


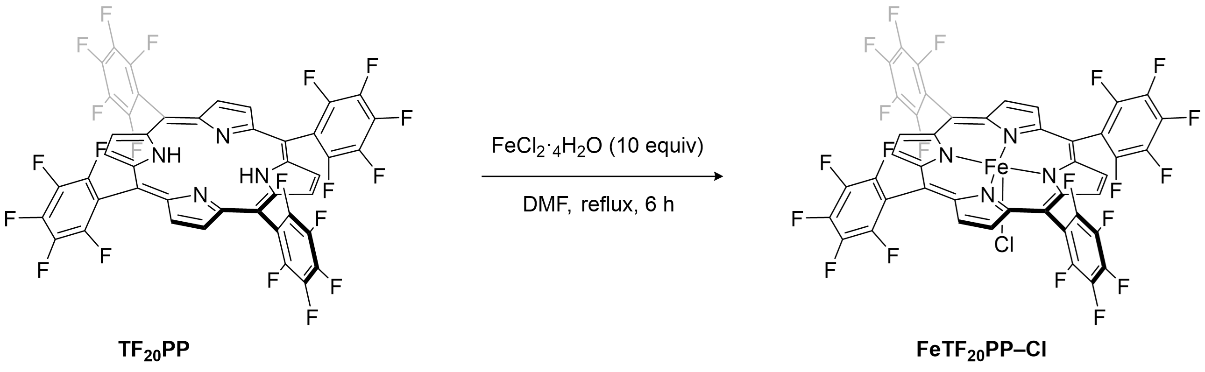


Supplementary Scheme . Synthesis of FeTF20PP–Cl

In an N2 filled glove box, a 20 mL vial equipped with a PTFE-coated magnetic stir bar was charged with **TF20PP** (50 mg, 50 µmol, 1.0 equiv), FeCl2.4H2O (0.10 g, 0.50 mmol, 10 equiv) and DMF (5.0 mL). The reaction was heated to reflux for 6 hours. Then the reaction mixture was diluted with 30 mL of CHCl3, the solution was washed with 25 mL of 1 N HCl and the mixture was extracted with CH2Cl2 (3 × 50 mL). The combined organic layers were dried over anhydrous Na2SO4, filtered and the collected organic layers were concentrated under reduced pressure. The resulting residue was washed with *n-*hexane (3 × 5 mL) and Et2O (3 × 5 mL). The glossy dark-brown powdery solid of **FeTF20PP–Cl** (29 mg, 27 µmol, 54%) was obtained and checked by UV-vis and HRMS.

**HRMS (ESI/Q-TOF)** m/z: [M+OH]– Calcd. for C44H19F10N4FeClO 1079.9489; found 1079.9795

## X-ray Crystallographic Data for **L1**


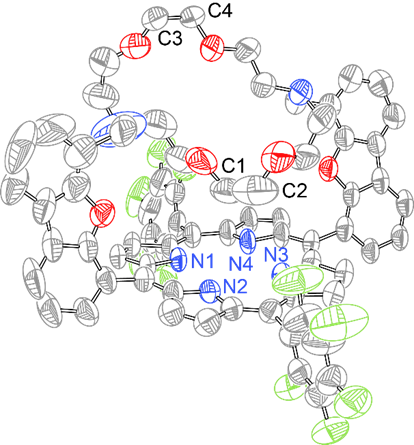


Supplementary Fig 2. Thermal ellipsoid plot of L1 drawn at the 50% probability.

Table S. Crystal data and structure refinement for L1 (CCDC 2443508)

| Detector | Pilatus 3 6M |
| --- | --- |
| Empirical (moiety) formula | C70N6O6F10H50 |
| Formula weight | 1261.19 |
| Temperature/K | 100.00 |
| Crystal system | orthorhombic |
| Space group | *P212121* |
| a, b, c/Å | 14.504(3), 14.912(3), 31.237(6) |
| α, β, γ/° | 90, 90, 90 |
| Volume/Å3 | 6756(2) |
| Z | 4 |
| ρcalcmg/m3 | 1.242 |
| μ/mm‑1 | 0.096 |
| F(000) | 2604.0 |
| Crystal size/mm3 | 0.28 × 0.07 × 0.04 |
| Radiation | Synchrotron (PLS-II 11C Bending magnet, λ = 0.70000) |
| 2Θ range for data collection/° | 2.98 to 59.972 |
| Index ranges | –18≤ h ≤18, –21≤ k ≤21, –42≤ l ≤41 |
| Reflections collected | 15616 |
| Independent reflections | 15616 [Rint = 0.1120, Rsigma = 0.0233] |
| Data/restraints/parameters | 15616/0/830 |
| Goodness-of-fit on F2 | 1.343 |
| Final R indexes [I>=2σ (I)] | R1 = 0.1002, wR2 = 0.3010 |
| Final R indexes [all data] | R1 = 0.1172, wR2 = 0.3272 |
| Largest diff. peak/hole / e Å–3 | 0.36/−0.37 |

## X-ray Crystallography Data of **L1_K**


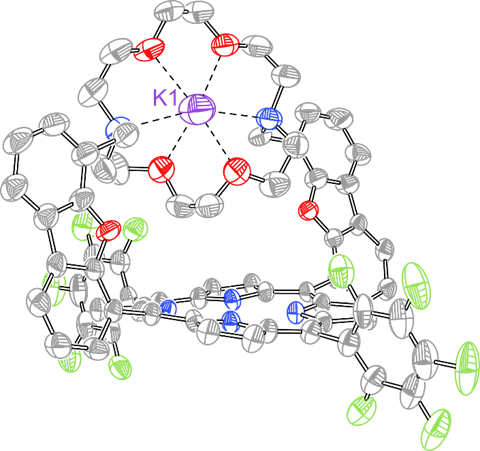


Supplementary Fig 3. Thermal ellipsoid plot of L1_K drawn at the 50% probability.

Table S2. Crystal data and structure refinement for L1_K (CCDC 2443504)

| Detector | Rayonix MX225HS CCD |
| --- | --- |
| Empirical (moiety) formula | C102H62BF34KN6O6 |
| Formula weight | 2163.48 |
| Temperature/K | 101(2) |
| Crystal system | Monoclinic |
| Space group | *P21* |
| a, b, c/Å | 15.145(3), 15.000(3), 25.204(5) |
| α, β, γ/° | 90, 106.40(3), 90 |
| Volume/Å3 | 5493(2) |
| Z | 2 |
| ρcalcmg/m3 | 1.308 |
| μ/mm‑1 | 0.150 |
| F(000) | 2188 |
| Crystal size/mm3 | 0.114 × 0.072 × 0.019 |
| Radiation | Synchrotron (PLS-II 2D Bending magnet, λ = 0.70000) |
| 2Θ range for data collection/° | 1.380 to 27.039 |
| Index ranges | –19≤ h ≤19, –19≤ k ≤19, –32≤ l ≤32 |
| Reflections collected | 50341 |
| Independent reflections | 25208 [Rint = 0.0722] |
| Data/restraints/parameters | 25208/4297/1595 |
| Goodness-of-fit on F2 | 0.945 |
| Final R indexes [I>=2σ (I)] | R1 = 0.0922, wR2 = 0.2349 |
| Final R indexes [all data] | R1 = 0.1597, wR2 = 0.2836 |
| Largest diff. peak/hole / e Å–3 | 0.447/−0.772 |

## X-ray Crystallographic Data for **L1_Na**


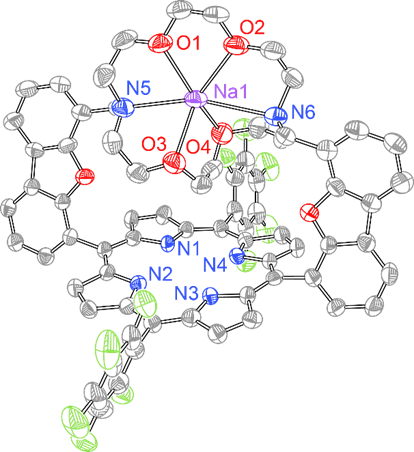


Supplementary Fig 4. Thermal ellipsoid plot of L1_Na drawn at the 50% probability.

Table S3. Crystal data and structure refinement for L1­­_Na (CCDC 2443509)

| Detector | Bruker APEX-II |
| --- | --- |
| Empirical (moiety) formula | C102H62BF34N6NaO6 |
| Formula weight | 2202.61 |
| Temperature/K | 100.00 |
| Crystal system | monoclinic |
| Space group | *P21* |
| a, b, c/Å | 15.2007(7), 15.0549(7), 25.3769(12) |
| α, β, γ/° | 90, 106.412(3), 90 |
| Volume/Å3 | 5570.8(5) |
| Z | 2 |
| ρcalcmg/m3 | 1.280 |
| μ/mm‑1 | 1.084 |
| F(000) | 2172.0 |
| Crystal size/mm3 | 0.18 × 0.12 × 0.08 |
| Radiation | CuKα (λ = 1.54178) |
| 2Θ range for data collection/° | 3.63 to 133.862 |
| Index ranges | –17≤h≤18, –17≤k≤17, –29≤l≤25 |
| Reflections collected | 163761 |
| Independent reflections | 19188 [Rint = 0.0577, Rsigma = 0.0271] |
| Data/restraints/parameters | 19188/1762/1512 |
| Goodness-of-fit on F2 | 1.042 |
| Final R indexes [I>=2σ (I)] | R1 = 0.0794, wR2 = 0.2247 |
| Final R indexes [all data] | R1 = 0.0867, wR2 = 0.2342 |
| Largest diff. peak/hole / e Å–3 | 0.48/−0.36 |

## X-ray Crystallographic Data for **ZnL1**


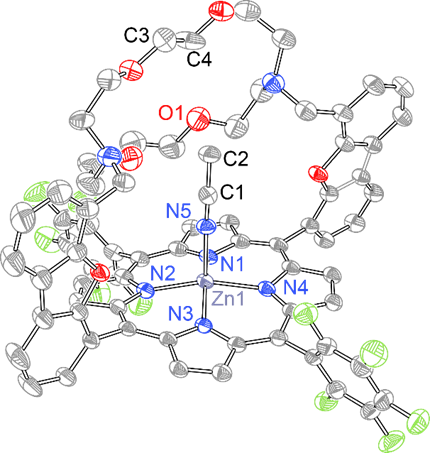


Supplementary Fig 5. Thermal ellipsoid plot of ZnL1 drawn at the 50% probability.

Table S4. Crystal data and structure refinement for ZnL1 (CCDC 2443506)

| Detector | Bruker APEX-II |
| --- | --- |
| Empirical (moiety) formula | C76H57F10N9O6Zn |
| Formula weight | 1447.67 |
| Temperature/K | 100(2) |
| Crystal system | monoclinic |
| Space group | *C2/c* |
| a, b, c/Å | 28.7437(4), 13.7039(2), 33.1753(5) |
| α, β, γ/° | 90, 99.2485(8), 90 |
| Volume/Å3 | 12897.9(3) |
| Z | 8 |
| ρcalcmg/m3 | 1.491 |
| μ/mm‑1 | 1.336 |
| F(000) | 5952.0 |
| Crystal size/mm3 | 0.1 × 0.04 × 0.02 |
| Radiation | CuKα (λ = 1.54178) |
| 2Θ range for data collection/° | 5.398 to 133.538 |
| Index ranges | –27≤h≤34, –16≤k≤16, –39≤l≤38 |
| Reflections collected | 157360 |
| Independent reflections | 11369 [Rint = 0.0417, Rsigma = 0.0165] |
| Data/restraints/parameters | 11369/274/997 |
| Goodness-of-fit on F2 | 1.028 |
| Final R indexes [I>=2σ (I)] | R1 = 0.0564, wR2 = 0.1557 |
| Final R indexes [all data] | R1 = 0.0643, wR2 = 0.1649 |
| Largest diff. peak/hole / e Å–3 | 1.05/–0.53 |

## X-ray Crystallographic Data for **ZnL1–CN_K**


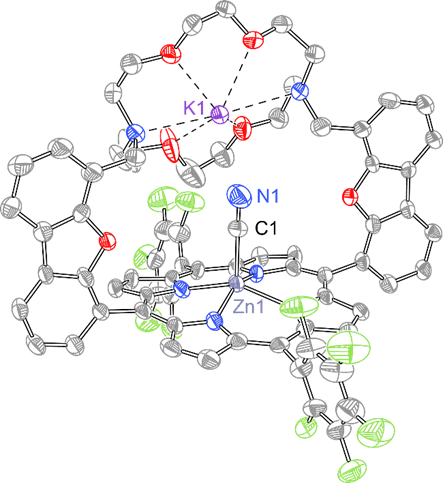


Supplementary Fig 6. Thermal ellipsoid plot of ZnL1–CN_K drawn at the 50% probability.

Table S5. Crystal data and structure refinement for ZnL1–CN_K (CCDC 2443503)

| Detector | Pilatus 3 6M |
| --- | --- |
| Empirical (moiety) formula | C71H48F10KN7O6Zn |
| Formula weight | 1389.65 |
| Temperature/K | 101(2) |
| Crystal system | monoclinic |
| Space group | *P21/n* |
| a, b, c/Å | 17.276(3), 15.139(3), 30.387(6) |
| α, β, γ/° | 90, 99.2485(8), 90 |
| Volume/Å3 | 7947(3) |
| Z | 4 |
| ρcalcmg/m3 | 1.162 |
| μ/mm‑1 | 0.414 |
| F(000) | 2840 |
| Crystal size/mm3 | 0.050 × 0.040 × 0.030 |
| Radiation | Synchrotron (PLS-II 11C Bending magnet, λ = 0.70000) |
| 2Θ range for data collection/° | 1.480 to 24.831 |
| Index ranges | –20≤h≤20, –18≤k≤18, –36≤l≤36 |
| Reflections collected | 52440 |
| Independent reflections | 14345 [Rint = 0.0913] |
| Data/restraints/parameters | 14345/216/1029 |
| Goodness-of-fit on F2 | 1.058 |
| Final R indexes [I>=2σ (I)] | R1 = 0.1210, wR2 = 0.3154 |
| Final R indexes [all data] | R1 = 0.1347, wR2 = 0.3256 |
| Largest diff. peak/hole / e Å–3 | 1.553/–0.822 |

## X-ray Crystallographic Data for **FeL1–Im2**


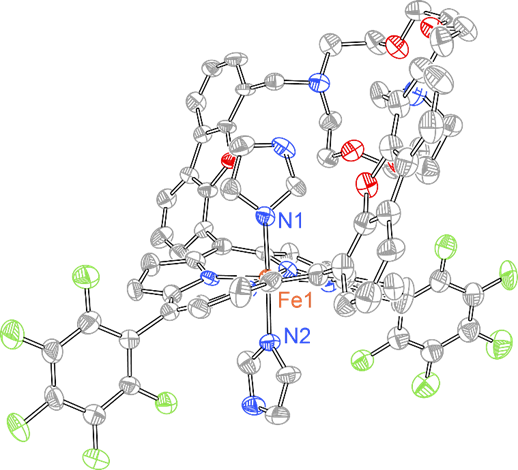


Supplementary Fig 7. Thermal ellipsoid plot of FeL1–Im2 drawn at the 50% probability.

Table S6. Crystal data and structure refinement for FeL1–Im2 (CCDC 2443505)

| Detector | Bruker APEX-II |
| --- | --- |
| Empirical (moiety) formula | C76H57N10O18F10Cl3Fe |
| Formula weight | 1750.51 |
| Temperature/K | 173(2) |
| Crystal system | orthorhombic |
| Space group | *P212121* |
| a, b, c/Å | 15.3413(10), 21.2431(14), 27.9337(19) |
| α, β, γ/° | 90, 90, 90 |
| Volume/Å3 | 9103.5(10) |
| Z | 4 |
| ρcalcmg/m3 | 1.277 |
| μ/mm‑1 | 0.340 |
| F(000) | 3576.0 |
| Crystal size/mm3 | 0.192 × 0.137 × 0.039 |
| Radiation | MoKα (λ = 0.71073) |
| 2Θ range for data collection/° | 4.776 to 56.112 |
| Index ranges | –20 ≤ h ≤ 18, –27 ≤ k ≤ 27, –36 ≤ l ≤ 27 |
| Reflections collected | 110910 |
| Independent reflections | 21956 [Rint = 0.0985, Rsigma = 0.0616] |
| Data/restraints/parameters | 21956/696/1195 |
| Goodness-of-fit on F2 | 1.042 |
| Final R indexes [I>=2σ (I)] | R1 = 0.0783, wR2 = 0.1871 |
| Final R indexes [all data] | R1 = 0.1002, wR2 = 0.1984 |
| Largest diff. peak/hole / e Å–3 | 0.64/−0.65 |

## UV-vis Spectrum Data for **L1** and **ZnL1**


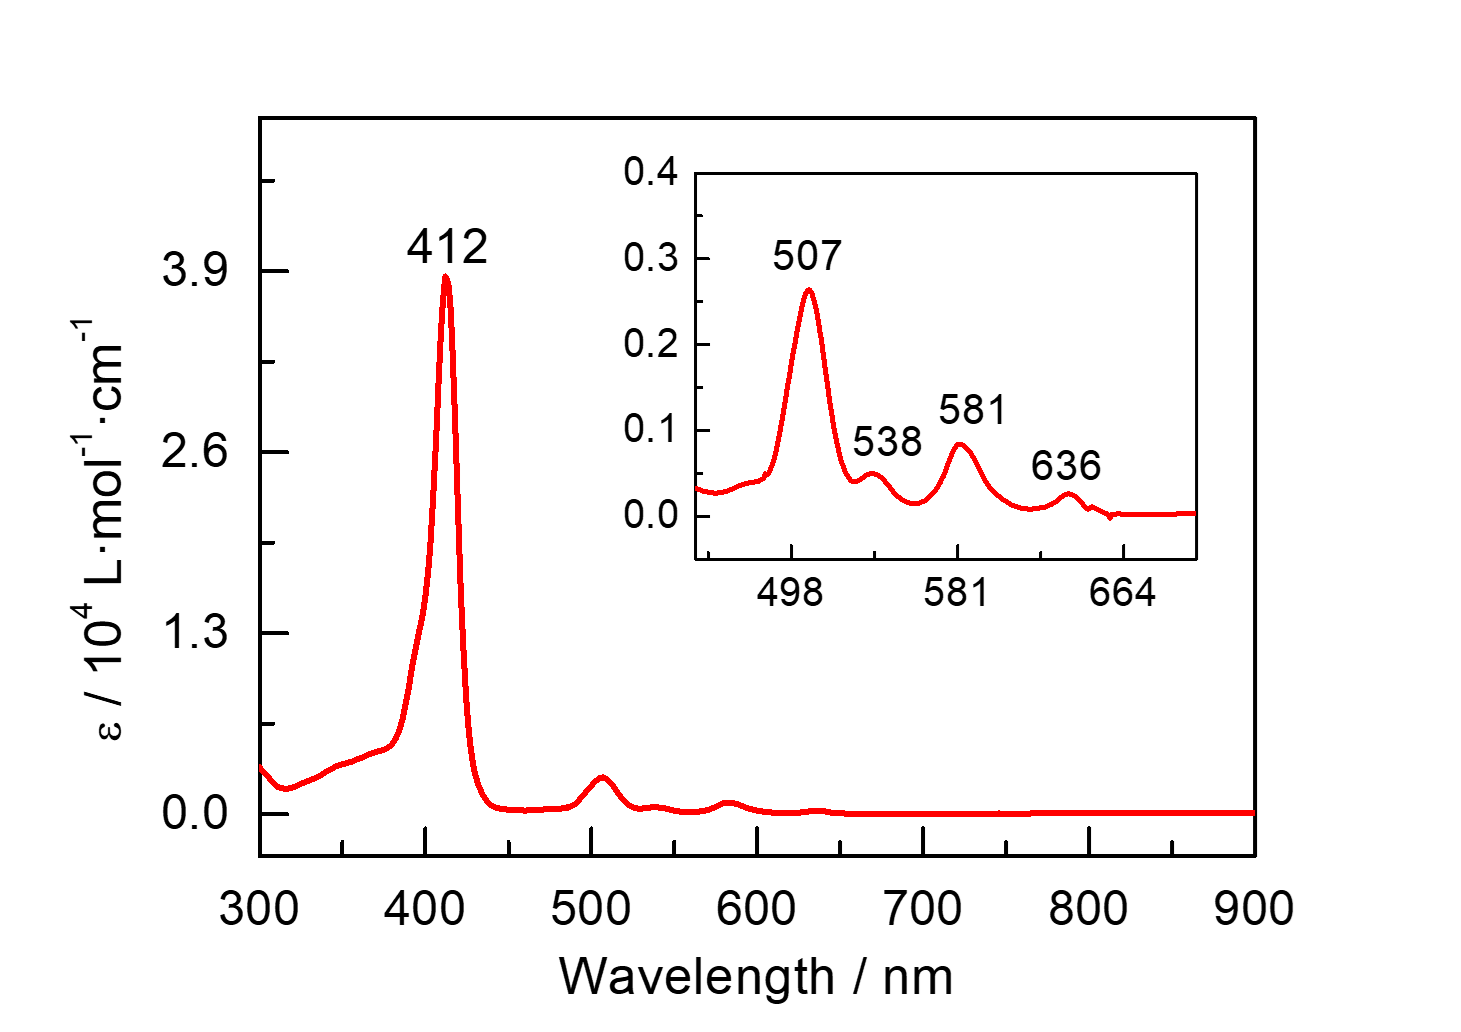


Supplementary Fig 8. UV-vis spectra of 2.5 µM L1 (▬, red) in CH3CN at 23 ℃


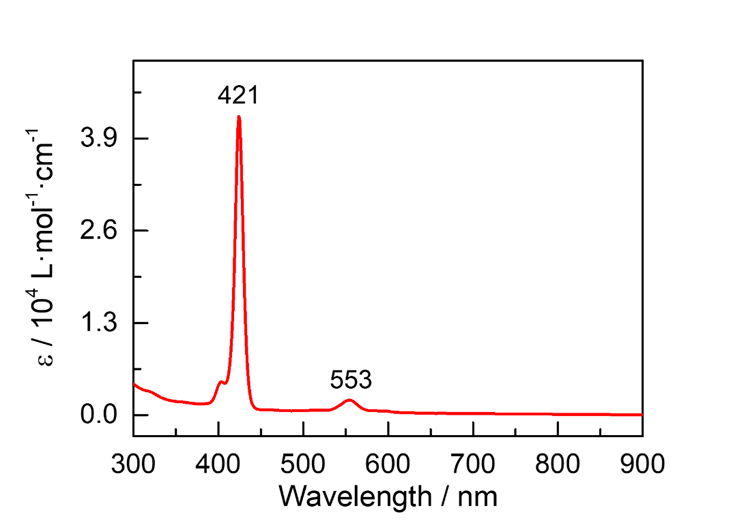


Supplementary Fig 9. UV-vis spectra of 1.25 µM ZnL1 (▬, red) in CH3CN at 23 ℃

## UV-vis Spectrum Data for **FeL1–Cl** and **FeL1–Im2**


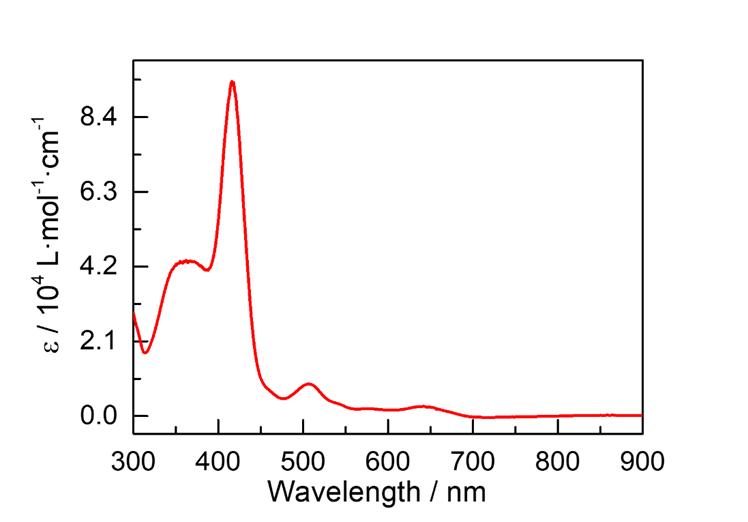


Supplementary Fig 10. UV-vis spectra of 14.3 µM FeL1–Cl (▬, red) in CH2Cl2 at 23 ℃ under N2


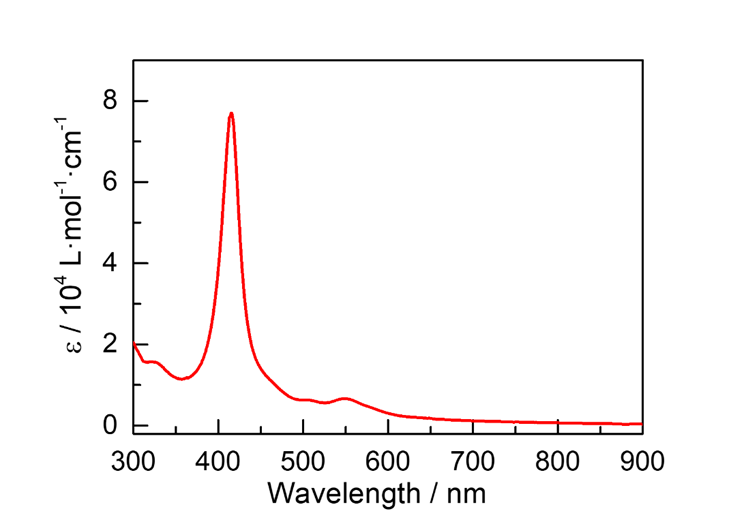


Supplementary Fig 11. UV-vis spectra of 14.3 µM FeL1–Im2 (▬, red) in CH2Cl2 at 23 ℃ under N2

## UV-vis Spectrum Data for **Fe**-incorporated Derivatives of the Control Ligands


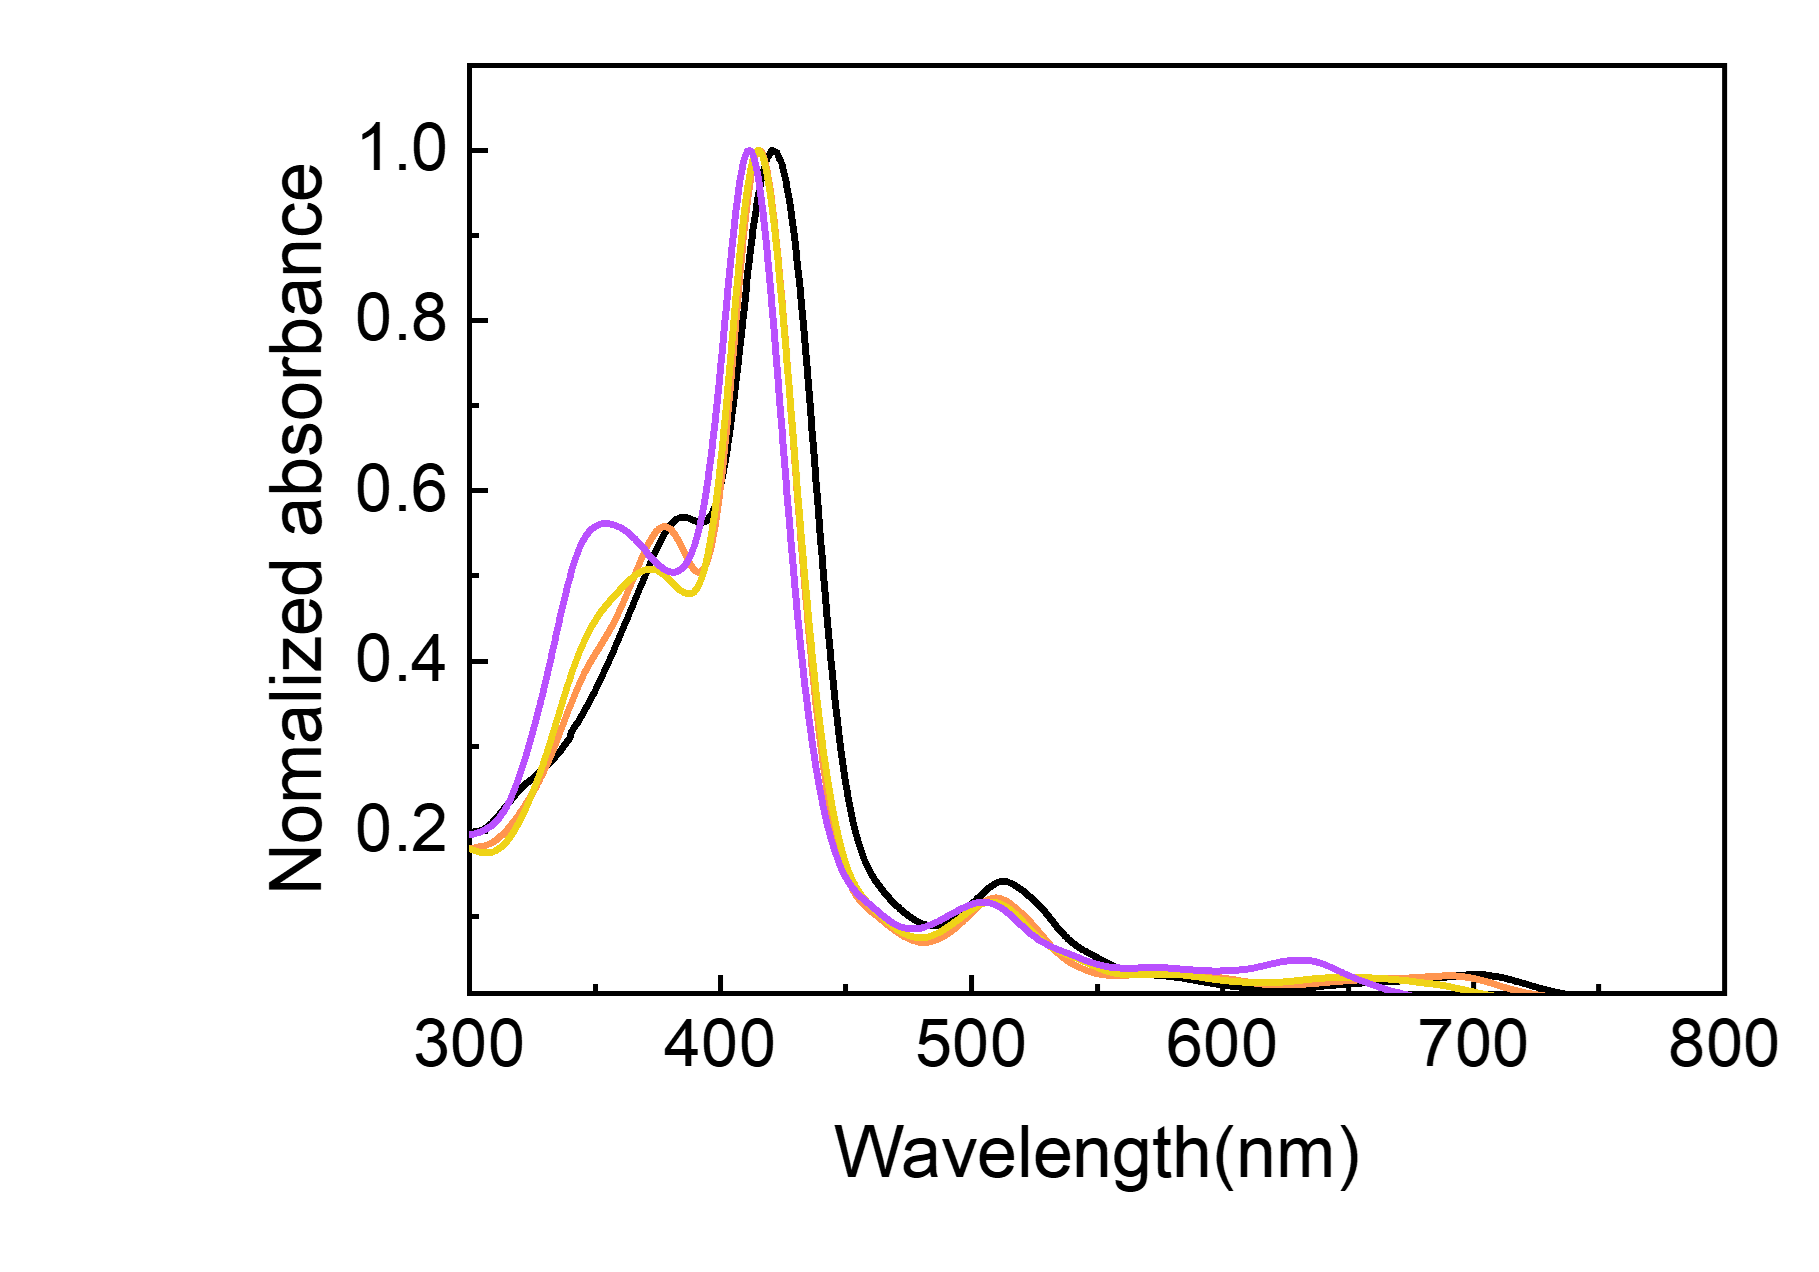


Supplementary Fig 12. UV-vis spectra of FeT*p*OMePP–Cl (▬, black), FeTPP–Cl (▬, yellow), FeTF10PP–Cl (▬, purple), and FeTF20PP–Cl (▬, orange) in CH2Cl2 (include 1% DMF) containing 0.1 M TBAPF6 at 23 °C, under the same conditions as electrochemical measurements.

## ESI-MS Spectrum of the Selected Compounds

The following are comparisons of High-Resolution Mass Spectrum (HRMS) measurements (▬, black solid line) and simulated results (▬, red solid line) for each major compound.


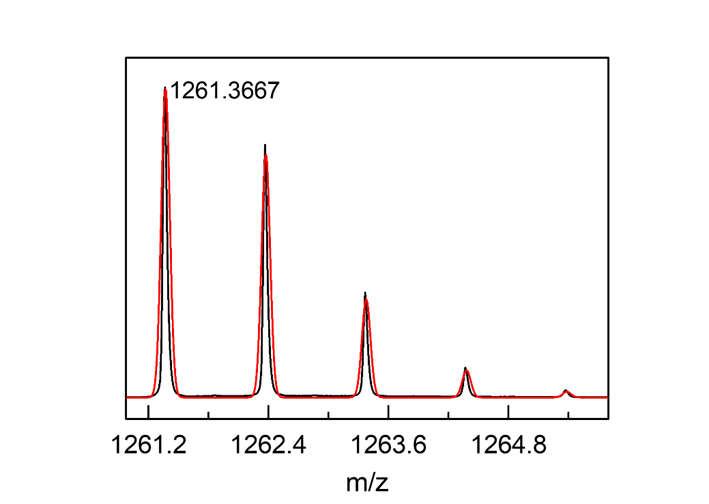


Supplementary Fig 13. HRMS scan of a CH2Cl2 solution of L1 mixture was obtained. Observed mass and isotope pattern at 1261.3667 m/z matches the predicted mass (1261.3705 m/z) for [L1+H]+.


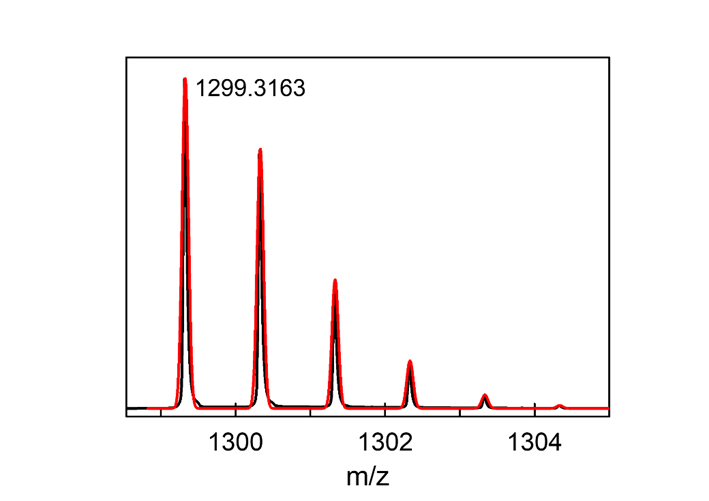


Supplementary Fig 14. HRMS scan of a CH2Cl2 solution of L1_K mixture was obtained. Observed mass and isotope pattern at 1299.3163 m/z matches the predicted mass (1299.3269 m/z) for [L1+K]+.


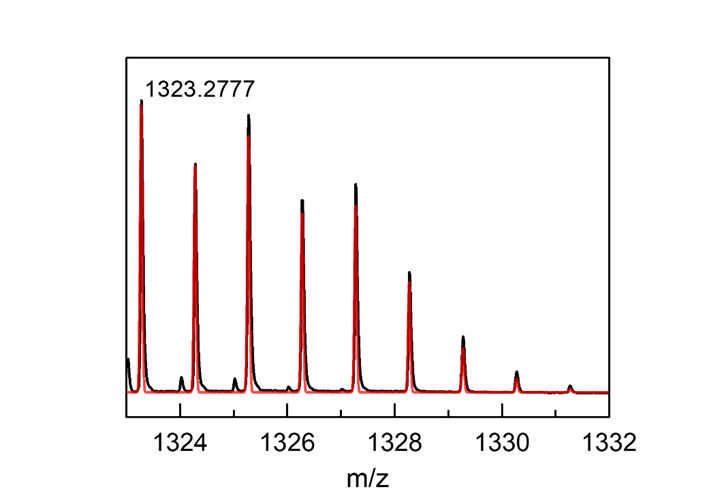


Supplementary Fig 15. HRMS scan of a CH2Cl2 solution of ZnL1 mixture was obtained. Observed mass and isotope pattern at 1323.2777 m/z matches the predicted mass (1324.2840 m/z) for [ZnL1+H]+.


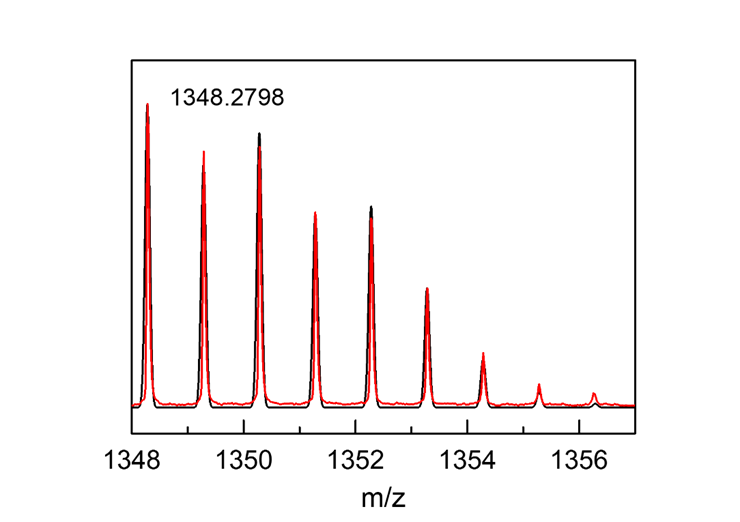


Supplementary Fig 16. HRMS scan of a CH2Cl2 solution of ZnL1–CN_K mixture was obtained. Observed mass and isotope pattern at 1348.2798 m/z matches the predicted mass (1348.28 m/z) for [ZnL1–CN+H]+.


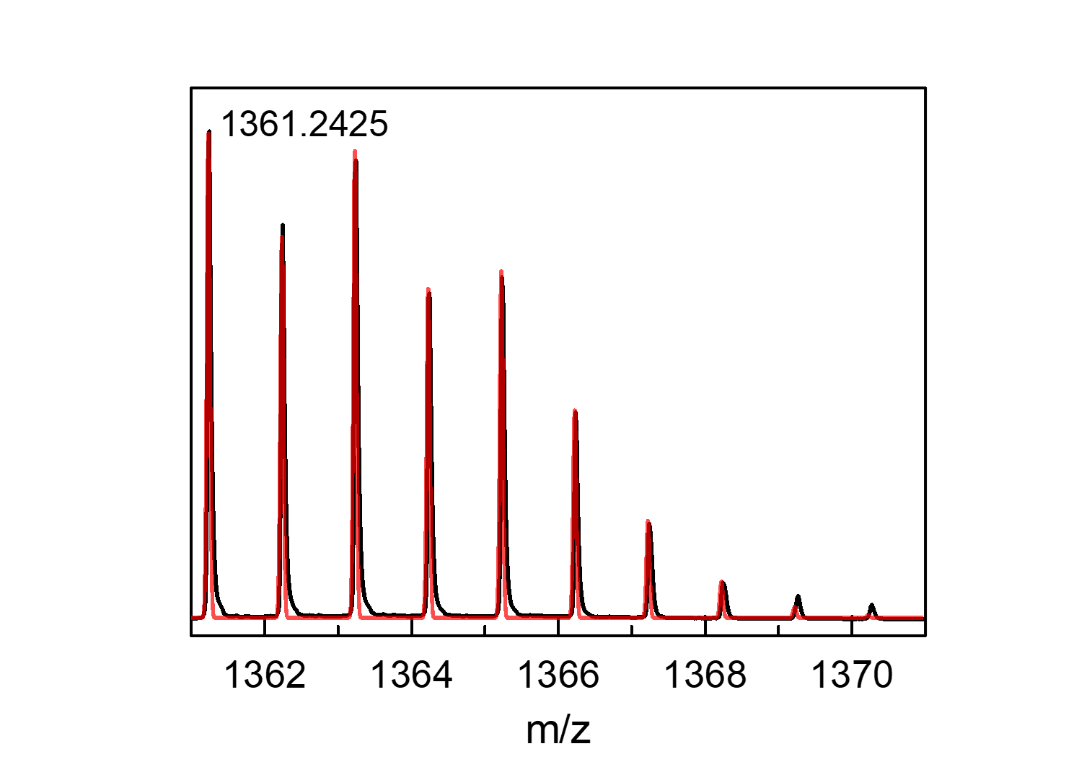


Supplementary Fig 17. HRMS scan of a CH3CN solution of ZnL1 with KOTf (5.0 equiv) mixture for ZnL1K was obtained. Observed mass and isotope pattern at 1361.2425 m/z matches the predicted mass (1361.2403 m/z) for [ZnL1_K]+.

**
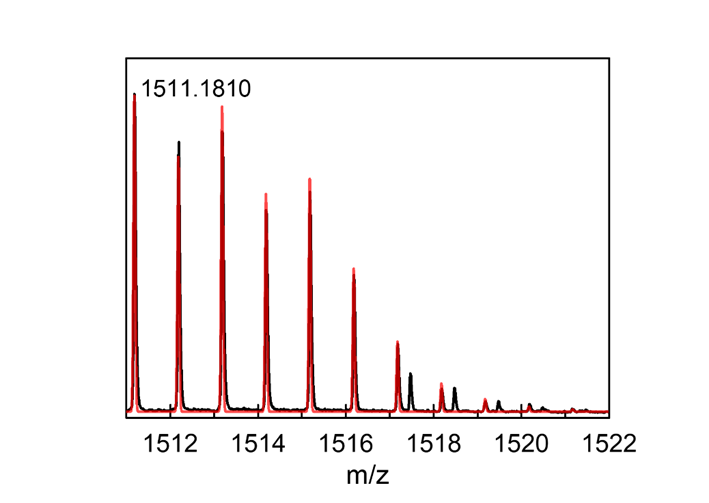
**

Supplementary Fig 18. HRMS scan of a CH3CN solution of ZnL1 with Ca(OTf)2 (5.0 equiv) mixture for ZnL1_Ca was obtained. Observed mass and isotope pattern at 1511.1810 m/z matches the predicted mass (1511.1908 m/z) for [ZnL1+CaOTf]+.


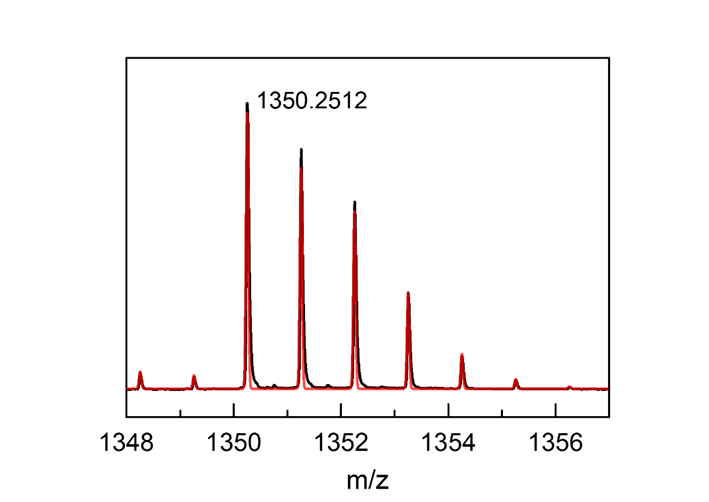


Supplementary Fig 19. HRMS scan of a CH3CN solution of FeL1–Cl mixture was obtained. Observed mass and isotope pattern at 1350.2512 m/z matches the predicted mass (1350.2581m/z) for [FeL1–Cl+H]+.


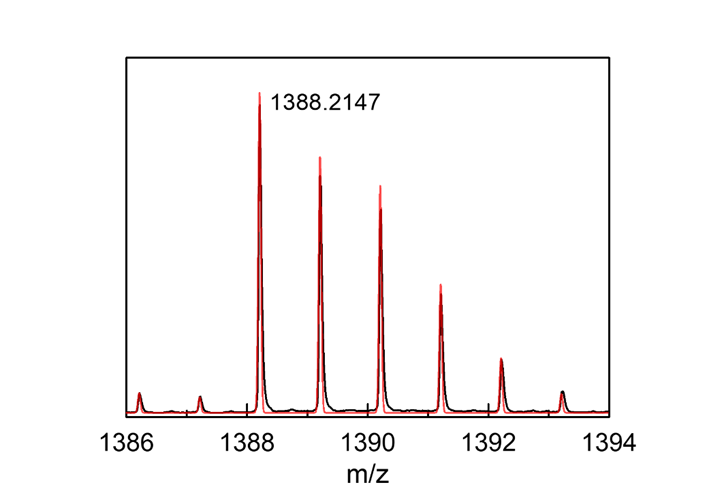


Supplementary Fig 20. HRMS scan of a CH3CN solution of FeL1–Cl with KOTf (5.0 equiv) mixture for FeL1–Cl_K was obtained. Observed mass and isotope pattern at 1388.2147 m/z matches the predicted mass (1388.2145 m/z) for [FeL1–Cl_K]+.


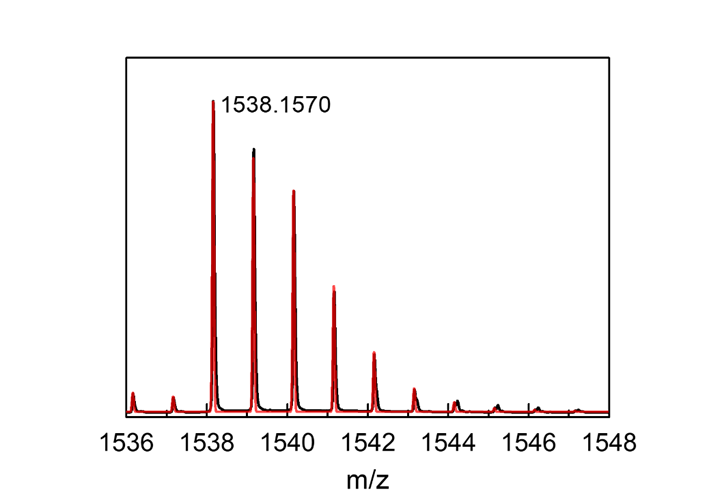


Supplementary Fig 21. HRMS scan of a CH3CN solution of FeL1–Cl with Ca(OTf)2 (5.0 equiv) mixture for FeL1–Cl_Ca was obtained. Observed mass and isotope pattern at 1538.1570 m/z matches the predicted mass (1538.1564 m/z) for [FeL1–Cl+CaOTf]+.


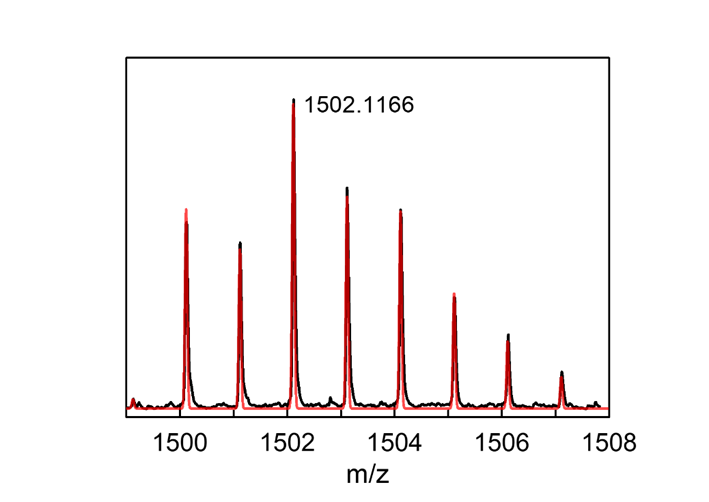


Supplementary Fig 22. HRMS scan of a CH3CN solution of FeL1–Cl with ScCl3 (5.0 equiv) mixture for FeL1–Cl_Sc was obtained. Observed mass and isotope pattern at 1502.1166 m/z matches the predicted mass (1502.1176 m/z) for [FeL1–Cl+ScCl3+H]+.

# Investigation of Field Effects in Model Complexes through Spectroscopic Analysis

## Job Plot Analysis for Demonstrating the 1:1 Binding of **L1** and Cation

Stock solutions of [H]0 = 10.0 mM and [G]0 = 10.0 mM were prepared in DMSO-*d*6 ([H] = concentration of L1, [G] = concentration of KBArF). By combining these stock solutions in different ratios of [H]/([H]+[G]) NMR samples were prepared as **Table S6**. Based on the 1H NMR chemical shifts observed from **L1** (H of β-pyrrole, N−H1a, N−H1b, N−H2 of diaza-crown ether moiety of **L1**) with different mole fractions, Job plot analysis shown in **Supplementary Fig 23** was prepared and analyzed to show 1:1 binding between **L1** and KBArF.


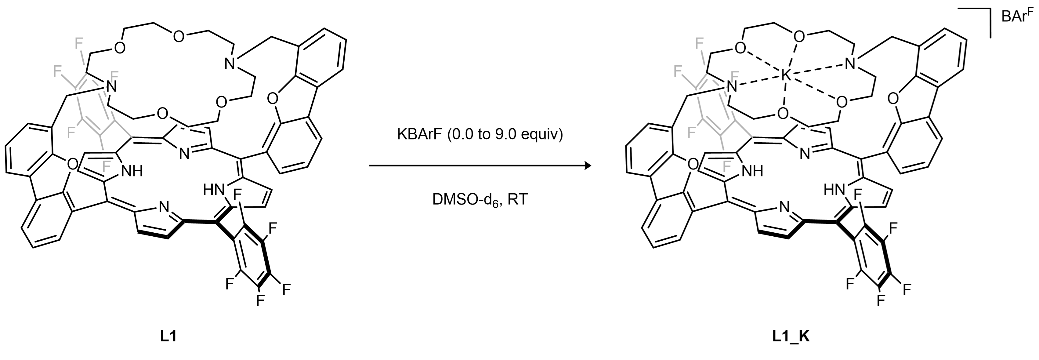


Supplementary Scheme . Synthesis of L1_K

Table S6. The preparation of the solution for the Job plot

| Mole fraction | Solution A (µL)*a* | Solution B (µL)*b* |
| --- | --- | --- |
| 0.1 | 100 | 900 |
| 0.2 | 200 | 800 |
| 0.4 | 200 | 300 |
| 0.5 | 500 | 500 |
| 0.6 | 500 | 333 |
| 0.8 | 500 | 125 |
| 1.0 | 500 | 0 |

*a* A 20 mM solution of **L1** was prepared by dissolving 13 mg (10 µmol) in 0.5 mL DMSO-*d*6
 *b* A 20 mM solution of KBArF was prepared by dissolving 27 mg (30 µmol) in 1.5 mL DMSO-*d*6


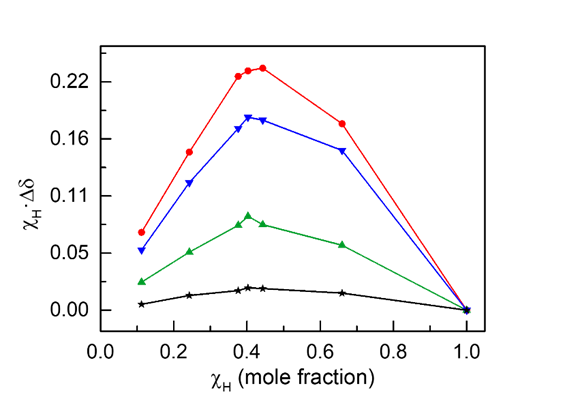


Supplementary Fig 23. Results of Job’s plot analysis about proton NMR shifts for H of  pyrrole (▬, black), N-H1a of diaza (▬, red), N-H1b of diaza (▬, blue), and N-H2 of diaza (▬, green).

After establishing 1:1 binding between **L1** and KBArF, binding affinity of K+ cation as a guest to the **L1** was investigated using derived equation (13)2 based on concentrations of the host-guest complex ([HG]) determined by equation (1) from the observed chemical shifts (by varying the amount of KBArF, where 0 indicates in the absence of KBArF and max indicates where no further change in was observed (**Supplementary Fig 24**).

|  |  | ( ) |
| --- | --- | --- |


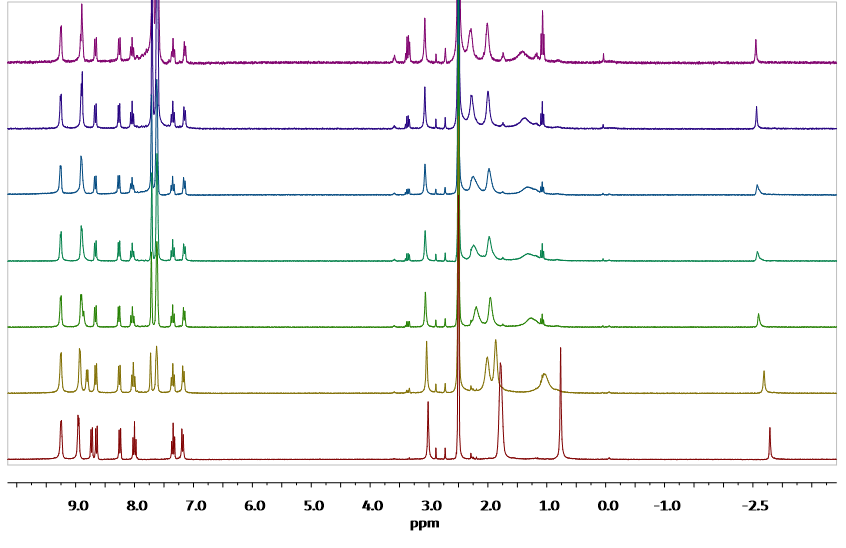


Supplementary Fig 24. 1H NMR results, measured in DMSO-*d*6, correspond to [L1]/([L1] + [KBArF]) = 1.0, 0.8, 0.6, 0.5, 0.4, 0.2, and 0.1, in an upward direction.

|  |  | ( ) |
| --- | --- | --- |
|  |  | ( ) |
|  |  | ( ) |
|  |  | ( ) |
|  |  | ( ) |

Then, the physical change (*Y*, 1H NMR shift) being monitored can usually be described as the aggregate of the individual components according to equation (7) as a function of concentration or as a function of mole fractions. *Y* means observed 1H NMR shifts during titration, *Y*H is the 1H NMR shifts of host (**L1**), and *Y*HG is the 1H NMR shifts of **L1_K** which will be fitted by these equations

|  |  | ( ) |
| --- | --- | --- |

With the equations above, it is able to obtain the function of *Y* with respect to , the mole fraction of *H*0. By substituting equation (4) into equation (7), we can derive the following equations.

|  |  | ( ) |
| --- | --- | --- |

As, substituting equation (3) for *K*a into the above equation,

|  |  | ( ) |
| --- | --- | --- |
|  |  | ( ) |
|  |  | ( ) |

Let with a mole fraction parameter () and apply it to equation (11), it can be simplified as follows;

|  |  | ( ) |
| --- | --- | --- |

Finally, the equation for the 1H NMR shifts measured in this experiment can be expressed as follows, as shown in equation (7). By substituting this, we can derive the equation for the relationship between the mole fraction and the 1H NMR shift as shown below. This relationship was then used to fit the data, as illustrated in **Supplementary Fig 21**, to determine the binding constant.

|  |  | ( ) |
| --- | --- | --- |


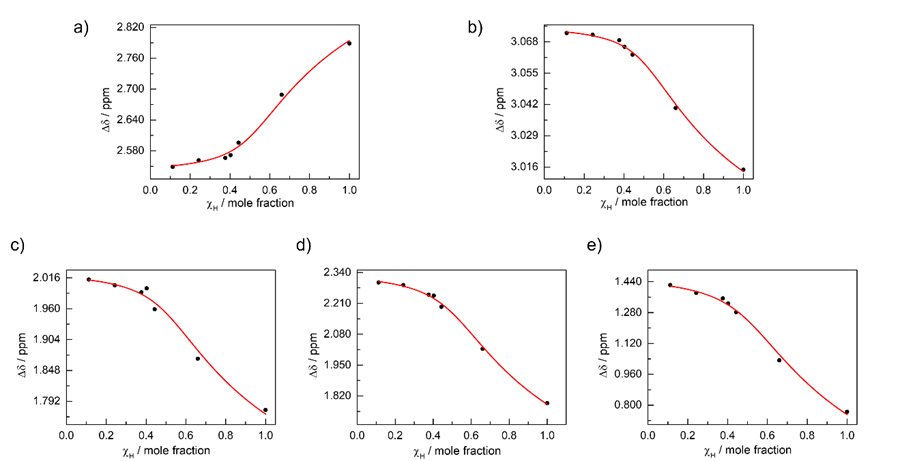


Supplementary Fig 25. 1H-NMR titration curves between L1 and KBArF in DMSO-*d*6. Based on the results obtained from the plots corrected using equation (13), it can be concluded that the binding constant (Ka) between L1 and KBArF is 1556.04 M-1. The specific findings for each plot are as follows: a) for pyrrolic NH, Ka=1813.0275 (R2=0.98948); b) for aromatic 4H, Ka=2028.46663 (R2=0.9962); c) for diaza H1a, Ka=1158.70592 (R2=0.99291); d) for diaza H1b, Ka=1484.14705 (R2=0.9871); e) for diaza H2, Ka=1295.83212 (R2=0.9965).

## NMR Study Using the **TF10PP** Ligand System as a Control for Non-Electric Field Effect

To compare in the experimental result obtained using **L1** with the control ligand **TF10PP** following experiments were conducted. As shown in **Supplementary Scheme 16**, KOTf was added in increasing equivalents to **TF10PP**, a form in which cation binding is not possible, and the observed chemical shifts of **TF10PP** were presented in **Supplementary Fig 26**.


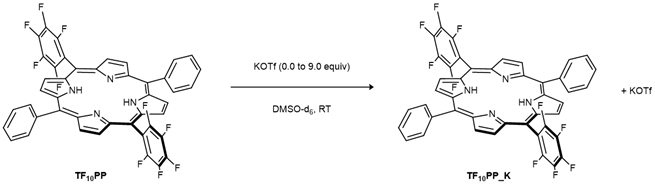


Supplementary Scheme . Synthesis of TF10PP_K

Stock solutions of [**TF10PP**]0 = 20 mM and [KOTf]0 = 20 mM were prepared in DMSO-*d*6. By combining the stock solutions in different ratios [**TF10PP**]/([**TF10PP**]+[KOTf]) of NMR samples were prepared as **Table S7.**, and their chemical shifts of proton signals were measured by 1H NMR spectroscopy. Unlike the observed changes in chemical shifts in **L1**, no change in chemical shifts of **TF10PP** were observed.

Table S7. The preparation of the solution for the Job plot

| Mole fraction | Solution A (µL)*a* | Solution B (µL)*b* |
| --- | --- | --- |
| 0.1 | 100 | 900 |
| 0.2 | 200 | 800 |
| 0.4 | 200 | 300 |
| 0.5 | 500 | 500 |
| 0.6 | 500 | 333 |
| 0.8 | 500 | 125 |
| 1.0 | 500 | 0 |

*a* A 20 mM solution of **TF10PP** was prepared by dissolving 10 mg (10 µmol) in 0.5 mL DMSO-*d*6
 *b* A 20 mM solution of KOTf was prepared by dissolving 5 mg (30 µmol) in 1.5 mL DMSO-*d*6


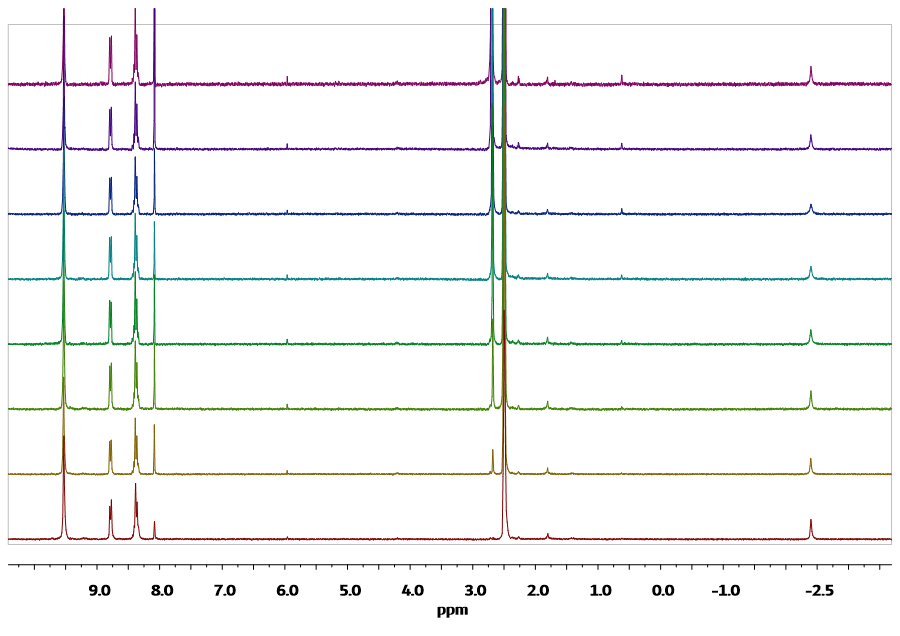


Supplementary Fig 26. 1H-NMR results, measured in DMSO-*d*6, correspond to [TF10PP]/([TF10PP]+[KOTf]) = 1.0, 0.8, 0.6, 0.5, 0.4, 0.3, 0.2, and 0.1, in an upward direction.

## Job Plot Analysis for Demonstrating the 1:1 Binding of **ZnL1** and Cation

As in **2.1**., the stoichiometry and binding constant for **ZnL1** and KBArF were measured. Stock solutions of [H]0 = 10.0 mM and [G]0 = 10.0 mM were prepared in DMSO-*d*6 ([H] = concentration of **ZnL1**, and [G] = concentration of KBArF). By combining the stock solutions in different ratios [**ZnL1**]/([**ZnL1**]+[KBArF]) of NMR samples were prepared as **Table S8.**, and their chemical shifts of proton signals were measured by 1H-NMR spectroscopy. Based on the 1H NMR chemical shifts observed from **ZnL1** (H of β-pyrrole, N−H1a, N−H1b, N−H2 of diaza-crown ether moiety of **ZnL1**) with different mole fractions, Job plot analysis shown in Supplementary **Fig 27** was prepared and analyzed to show 1:1 binding between **ZnL1** and KBArF.


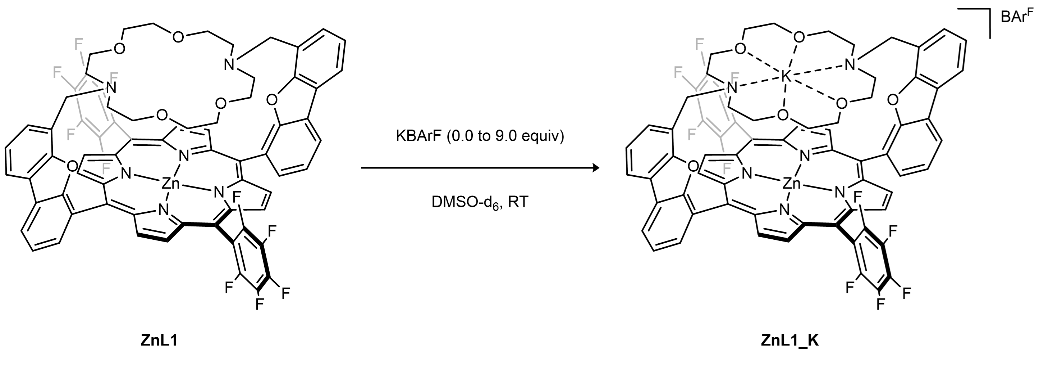


Supplementary Scheme . Synthesis of ZnL1_K

Table S8. The preparation of the solution for the Job plot

| Mole fraction | Solution A (µL)*a* | Solution B (µL)*b* |
| --- | --- | --- |
| 0.1 | 100 | 900 |
| 0.2 | 200 | 800 |
| 0.4 | 200 | 300 |
| 0.5 | 500 | 500 |
| 0.6 | 500 | 333 |
| 0.8 | 500 | 125 |
| 1.0 | 500 | 0 |

*a* A 20.0 mM solution of **ZnL1** was prepared by dissolving 13 mg (10 µmol) in 0.5 mL DMSO-*d*6
 *b* A 20.0 mM solution of KBArF was prepared by dissolving 27 mg (30 µmol) in 1.5 mL DMSO-*d*6


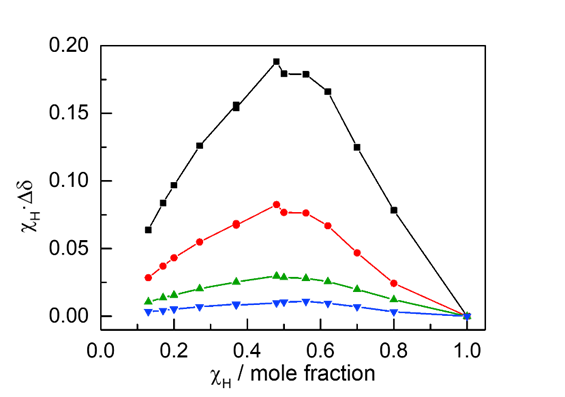


Supplementary Fig 27. Results of Job plot analysis about proton NMR shifts for NH of diaza (▬, black), NH of diaza (▬, red), H of -pyrrole (▬, green), and H of benzofuran (▬, blue).


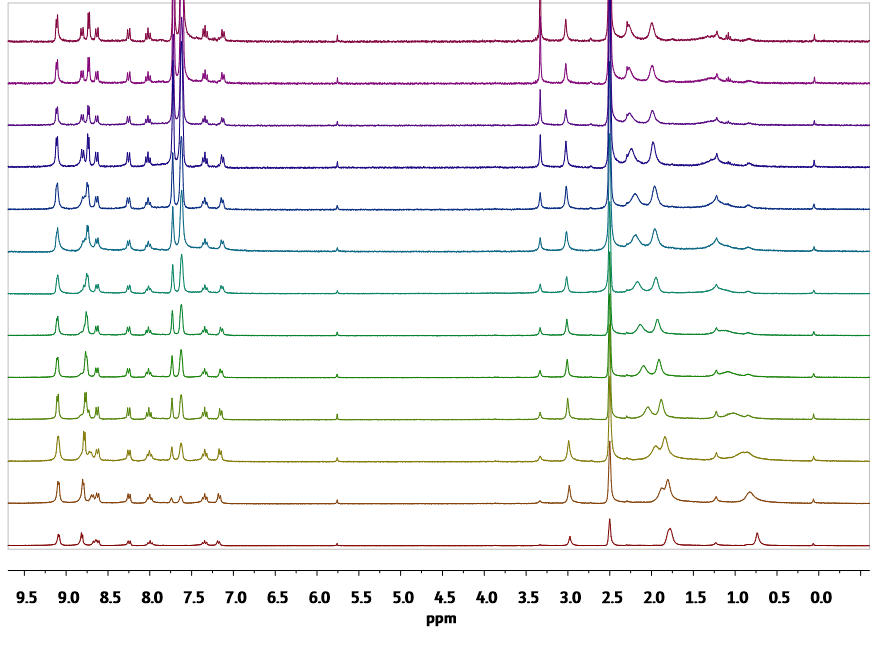


Supplementary Fig 28. 1H NMR results, measured in DMSO-*d*6, correspond to [ZnL1]/([ZnL1] + [KBArF]) = 1.0, 0.9, 0.8, 0.7, 0.6, 0.5, 0.4, 0.3, 0.2, and 0.1, in an upward direction

After establishing 1:1 binding between **ZnL1** and KBArF, the binding affinity of the K+ cation as a guest to **ZnL1** was investigated using the derived equations, as described in **2.1**. The binding constant was subsequently calculated. Similar to the **L1_K** system, the binding affinity between **ZnL1** and KBArF was determined using equation (13), and the results are presented in **Supplementary Fig 29**.

**
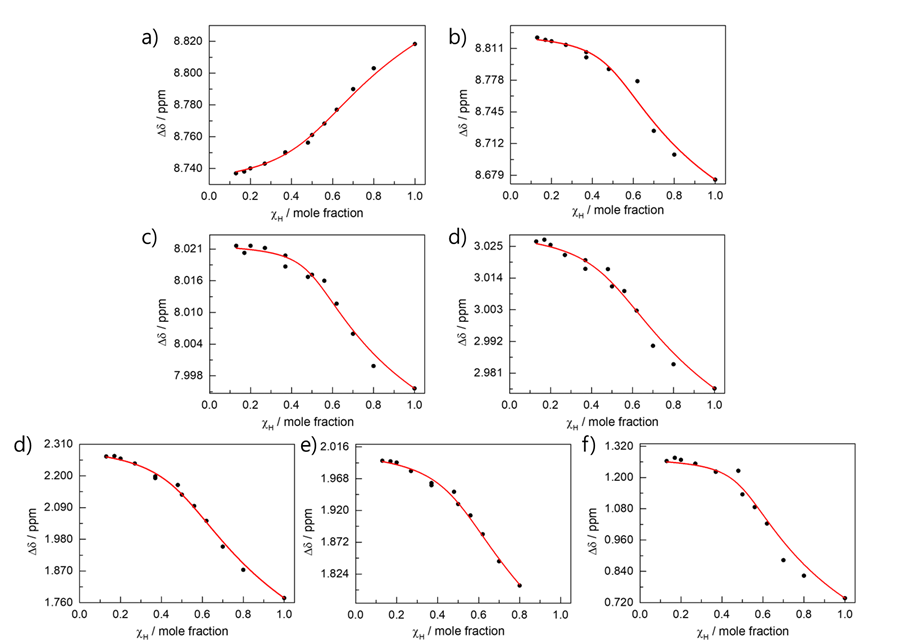
**

Supplementary Fig 29. 1H-NMR titration curves between ZnL1 and KBArF in DMSO-*d*6. Based on the results obtained from the plots corrected by equation (13), it can be concluded that the binding constant (Ka) between ZnL1 and KBArF is 1709.02 M-1. The specific findings for each plot are as follows: a) for pyrrolic NH, Ka=804.2768 (R2=0.99461); b) for aromatic Ha, Ka=1954.0458 (R2=0.98286); c) for aromatic Hd, Ka=2885.5900 (R2=0.98102); d) for benzylic 4H, Ka=1032.7709 (R2=0.98716); e) for diaza Ha, Ka=1108.25788 (R2=0.99397); f) for diaza Hb, Ka=1285.2447 (R2=0.99107); and g) for diaza Hc, Ka=2892.9837 (R2=0.98109).

## Cyclic Voltammetry Study in Electric Field Effect with **ZnL1**

In an N2-filled glove box, tetrabutylammonium hexafluorophosphate (TBAPF6, 155 mg, 400 µmol) was dissolved in 4.0 mL of dry acetonitrile to give a 0.10 M TBAPF6 solution. After scanning the solvent window to ensure the absence of any possible impurities, 1.0 mM of **ZnL1** solution was prepared for cyclic voltammetry. All scans were referenced to the ferrocenium/ferrocene (Fc+/0) couple at 0.0 V after adding an equimolar amount of ferrocene to the solution for all samples measured below.

The cyclic voltammogram of **ZnL1** was measured at various scan rates (100, 200, 400, 600, 800, 1000 mV/s) in a 0.10 M TBAPF6 solution in anhydrous CH3CN under N2.


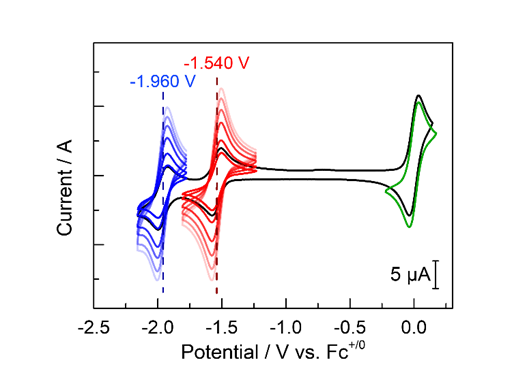


Supplementary Fig 30. Cyclic Voltammogram of ZnL1 in various scan rates (gradient-colored lines from dark to light; 100 mV/s to 1 V/s, respectively). Two reversible reductive features associated with the ligand-based reduction were observed at –1.960 V vs Fc+/0 (ZnL1/ZnL1⦁–) (▬, blue) and –1.540 V vs Fc+/0 (ZnL1⦁–/ZnL12–) (▬, red). Scan-rate-dependent cyclic voltammetry of ZnL1 showing porphyrin-ring-centered reduction waves along with the electroactivity of the complexed metal cation for redox-active metal centers. Fc+/0 reductive feature (▬, green) was also observed by adding an additional amount to ZnL1 (▬, black) at a scan rate of 100 mV/s.

To observe the changes in redox potential of the system due to the electric field effect, we subsequently added various metal triflate salts (M= Li+, Na+, K+, Ca2+, Ba2+, Sr2+, Y3+, Eu3+ and La3+) in 5 equivalents to the **ZnL1** solution shown in **Supplementary Fig 30**. Each metal triflate salt was prepared by dissolving 4.0 µmol in 0.2 mL of a 0.1 M TBAPF6 electrolyte stock solution and then added to the **ZnL1**. Before conducting each experiment of adding cations, the voltammogram of **ZnL1** in CH3CN (1.0 mM) was measured at variable scan rates (100, 200, 400, 600, 800, and 1000 mV/s) in 0.10 M TBAPF6 solution.


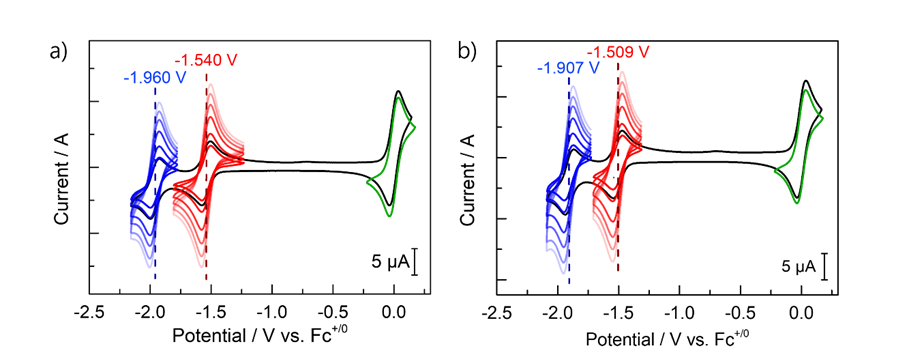


Supplementary Fig 31. a) Cyclic Voltammogram of ZnL1 in various scan rates (gradient-colored lines from dark to light; 100 mV/s to 1 V/s, respectively) as same as with Supplementary Fig 31.; and b) Cyclic Voltammogram of ZnL1_K in various scan rates (gradient-colored lines from dark to light; 100 mV/s to 1 V/s, respectively) by adding 5 equivalents of KOTf to ZnL1. Two reversible reductive features associated with the ligand-based reduction were observed at –1.907 V vs Fc+/0 (ZnL1/ZnL1⦁–) (▬, blue) and –1.509 V vs Fc+/0 (ZnL1⦁–/ZnL12–) (▬, red). Fc+/0 reductive feature (▬, green) was also observed by adding an additional to ZnL1_K (▬, black) at a scan rate of 100 mV/s.


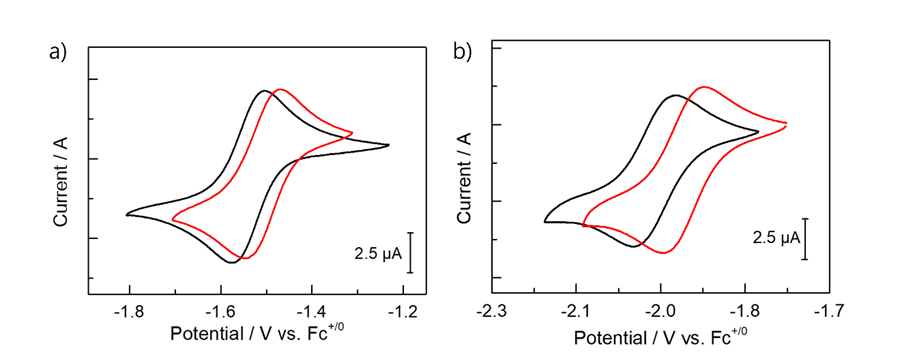


Supplementary Fig 32. Cyclic Voltammograms of ZnL1_K (▬, red) are overlayed with ZnL1 (▬, black) to show the shifts of redox potential by adding 5 equivalents of KOTf. a) The first reversible redox couple for ZnL1/ZnL1⦁– shows an anodic shift of 31 mV after addition of KOTf from –1.540 V vs Fc+/0 (▬, black) to –1.509 V vs Fc+/0(▬, red); b) the second redox couple for ZnL1⦁–/ZnL12– shows anodic shifts of 53 mV, from –1.960 V vs Fc+/0 (▬, black) to –1.907 V vs Fc+/0 (▬, red).


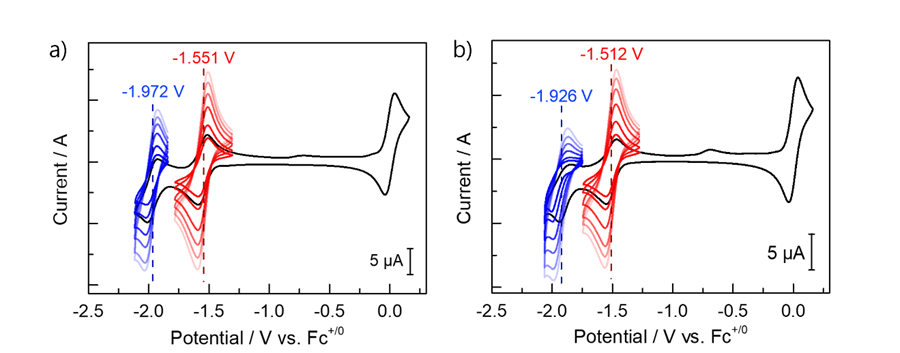


Supplementary Fig 33. a) Cyclic Voltammogram of ZnL1 in various scan rates (gradient-colored lines from dark to light; 100 mV/s to 1 V/s, respectively). Two reversible reductive features associated with the ligand-based reduction were observed at –1.972 V vs Fc+/0 (ZnL1/ZnL1⦁–) (▬, blue) and –1.551 V vs Fc+/0 (ZnL1⦁–/ZnL12–) (▬, red). Fc+/0 reductive feature observed (▬, green) was also by adding an additional amount to ZnL1 (▬, black) at a scan rate of 100 mV/s.; and b) Cyclic Voltammogram of ZnL1_Na in various scan rates (gradient-colored lines from dark to light; 100 mV/s to 1 V/s, respectively) by adding 5 equivalents of NaOTf to ZnL1. Two reversible reductive features associated with the ligand-based reduction were observed at –1.926 V vs Fc+/0 (ZnL1/ZnL1⦁–) (▬, blue) and –1.512 vs Fc+/0 (ZnL1⦁–/ZnL12–) (▬, red) for ZnL1_Na.


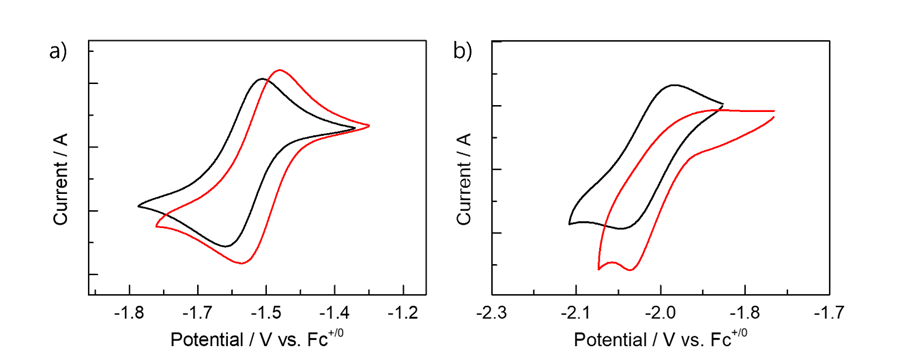


Supplementary Fig 34. Cyclic Voltammograms of ZnL1_Na (▬, red) are overlayed with ZnL1 (▬, black) to show the shifts of redox potential after adding 5 equivalents of NaOTf. a) The first reversible redox couple for ZnL1/ZnL1⦁– shows an anodic shift by 39 mV after addition of NaOTf from –1.551 V vs Fc+/0(▬, black) to –1.512 V vs Fc+/0(▬, red); b) the second redox couple for ZnL1⦁–/ZnL12– shows anodic shifts of 46 mV, from –1.972 V vs Fc+/0(▬, black) to –1.926 V vs Fc+/0 (▬, red). Unexpectedly, upon the addition of NaOTf, the electrochemically reversible redox couple for ZnL1⦁–/ZnL12– changes into an irreversible redox couple. Subsequently, the same phenomenon was observed with the addition of other cations, suggesting that the effect was induced by triflate.


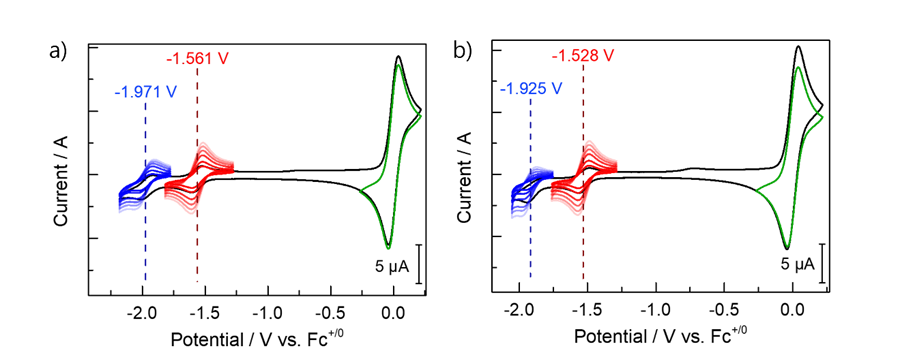


Supplementary Fig 35. a) Cyclic Voltammogram of ZnL1 in various scan rates (gradient-colored lines from dark to light; 100 mV/s to 1 V/s, respectively). Two reversible reductive features associated with the ligand-based reduction were observed at –1.971 V vs Fc+/0 (ZnL1/ZnL1⦁–) (▬, blue) and –1.561 V vs Fc+/0 (ZnL1⦁–/ZnL12–) (▬, red). Fc+/0 reductive feature (▬, green) was also observed by adding an additional amount to ZnL1 (▬, black) at a scan rate of 100 mV/s.; and b) Cyclic Voltammogram of ZnL1_Li in various scan rates (gradient-colored lines from dark to light; 100 mV/s to 1 V/s, respectively) by adding 5 equivalents of LiOTf to ZnL1. Two reversible reductive features associated with the ligand-based reduction were observed at –1.925 V vs Fc+/0 (ZnL1/ZnL1⦁–) (▬, blue) and –1.528 vs Fc+/0 (ZnL1⦁–/ZnL12–) (▬, red) for ZnL1_Li. Fc+/0 reductive feature (▬, green) was also observed by adding an additional amount to ZnL1_Li (▬, black) at a scan rate of 100 mV/s.


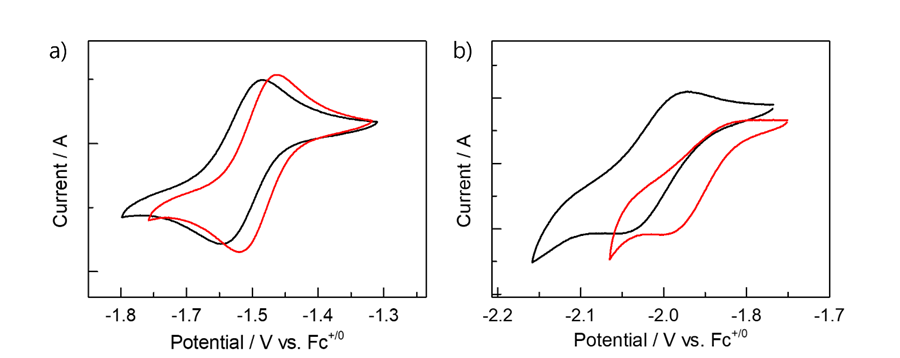


Supplementary Fig 36. Cyclic Voltammograms of ZnL1_Li (▬, red) are overlayed with ZnL1 (▬, black) to show the shifts of redox potential after adding 5 equivalents of LiOTf. a) first reversible redox couple for ZnL1/ZnL1⦁– shows an anodic shift of 33 mV after addition of LiOTf from –1.561 V vs Fc+/0 (▬, black) to –1.528 V vs Fc+/0 (▬, red); and b) the second redox couple for ZnL1⦁–/ZnL12– also shows anodic shifts but unexpectedly, upon the addition of LiOTf, the electrochemically reversible redox couple for ZnL1⦁–/ZnL12– changes into an irreversible redox couple.


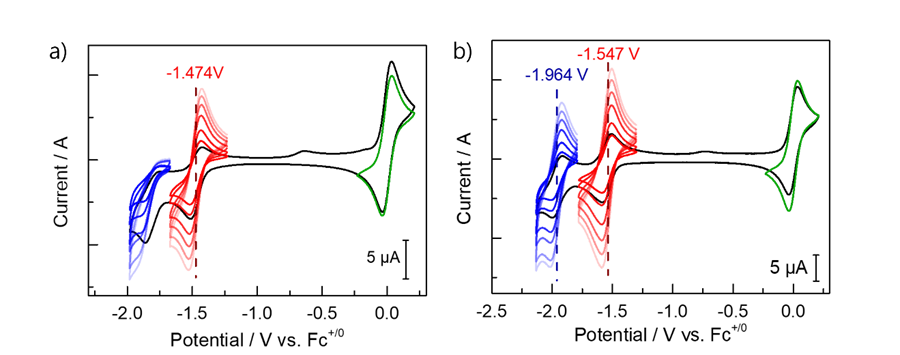


Supplementary Fig 37. a) Cyclic Voltammogram of ZnL1 in various scan rates (gradient-colored lines from dark to light; 100 mV/s to 1 V/s, respectively). Two reversible reductive features associated with the ligand-based reduction were observed at –1.964 V vs Fc+/0 (ZnL1/ZnL1⦁–) (▬, blue) and –1.547 V vs Fc+/0 (ZnL1⦁–/ZnL12–) (▬, red). Fc+/0 reductive feature (▬, green) was also observed by adding an additional amount to ZnL1 (▬, black) at a scan rate of 100 mV/s.; and b) Cyclic Voltammogram of ZnL1_Ba in various scan rates (gradient-colored lines from dark to light; 100 mV/s to 1 V/s, respectively) by adding 5 equivalents of Ba(OTf)2 to ZnL1. The first redox couple for ZnL1_Ba was observed at –1.447 V vs Fc+/0 (ZnL1⦁–/ZnL12–) (▬, red) in electrochemically reversible feature, but the second redox couple (ZnL1/ZnL1⦁–) (▬, blue) was changed into irreversible couple after anodic shift from ZnL1. Fc+/0 reductive feature (▬, green) was also observed by adding an additional amount to ZnL1_Ba (▬, black) at a scan rate of 100 mV/s.


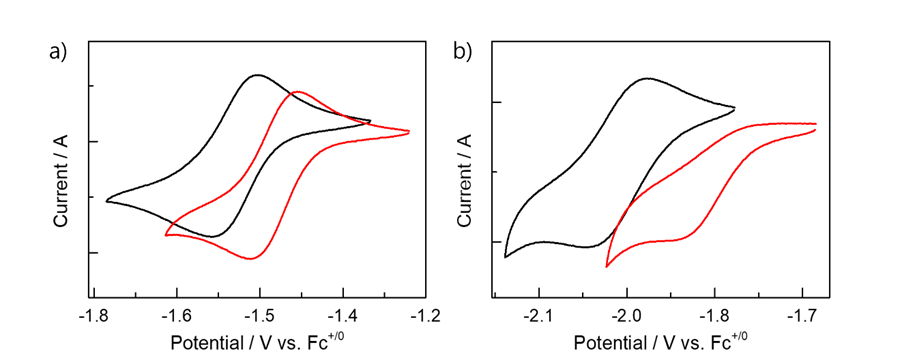


Supplementary Fig 38. Cyclic Voltammograms of ZnL1_Ba (▬, red) are overlayed with ZnL1 (▬, black) to show the shifts of redox potential after adding 5 equivalents of Ba(OTf)2. a) The first reversible redox couple for ZnL1/ZnL1⦁– shows an anodic shift by 73 mV after addition of Ba(OTf)2 from –1.547 V vs Fc+/0 (▬, black) to –1.474 V vs Fc+/0 (▬, red); and b) the second redox couple for ZnL1⦁–/ZnL12– also shows anodic shifts but unexpectedly, upon the addition of Ba(OTf)2, the electrochemically reversible redox couple for ZnL1⦁–/ZnL12– changes into an irreversible redox couple.


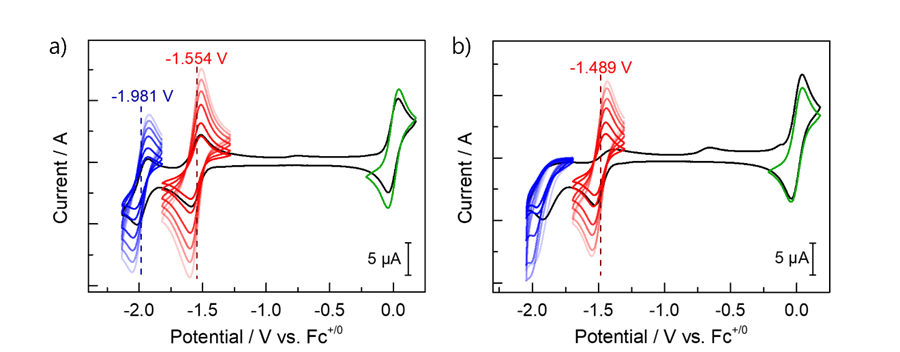


Supplementary Fig 39. a) Cyclic Voltammogram of ZnL1 in various scan rates (gradient-colored lines from dark to light; 100 mV/s to 1 V/s, respectively). Two reversible reductive features associated with the ligand-based reduction were observed at –1.981 V vs Fc+/0 (ZnL1/ZnL1⦁–) (▬, blue) and –1.554 V vs Fc+/0 (ZnL1⦁–/ZnL12–) (▬, red). Fc+/0 reductive feature (▬, green) was also observed after adding an additional amount to ZnL1 (▬, black) at a scan rate of 100 mV/s.; and b) Cyclic Voltammogram of ZnL1_Ca in various scan rates (gradient-colored lines from dark to light; 100 mV/s to 1 V/s, respectively) by adding 5 equivalents of Ca(OTf)2 to ZnL1. The first redox couple for ZnL1_Ca was observed at –1.489 V vs Fc+/0 (ZnL1⦁–/ZnL12–) (▬, red) in electrochemically reversible feature, but the second redox couple (ZnL1/ZnL1⦁–) (▬, blue) was changed into irreversible couple after anodic shift from ZnL1. Fc+/0 reductive feature (▬, green) was also observed by adding an additional amount to ZnL1_Ca (▬, black) at a scan rate of 100 mV/s.


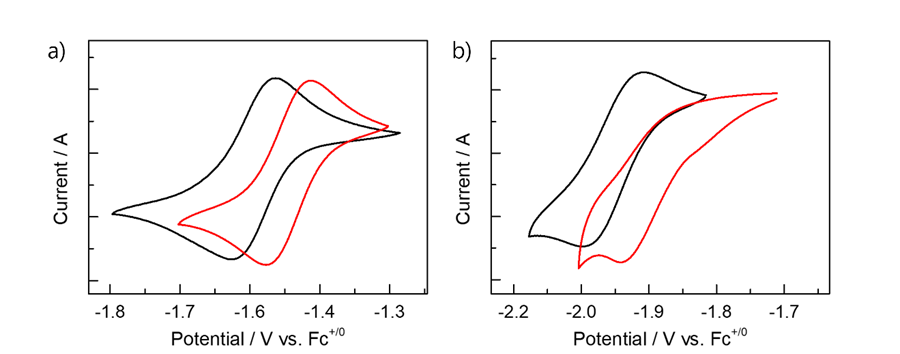


Supplementary Fig 40. Cyclic Voltammograms of ZnL1_Ca (▬, red) are overlayed with ZnL1 (▬, black) to show the shifts of redox potential by adding 5 equivalents of Ca(OTf)2. a) The first reversible redox couple for ZnL1/ZnL1⦁– shows an anodic shift by 65 mV after addition of Ca(OTf)2 from –1.554 V vs Fc+/0 (▬, black) to –1.489 V vs Fc+/0 (▬, red); and b) the second redox couple for ZnL1⦁–/ZnL12– also shows anodic shifts but unexpectedly, upon the addition of Ba(OTf)2, the electrochemically reversible redox couple for ZnL1⦁–/ZnL12– changes into ab irreversible redox couple.


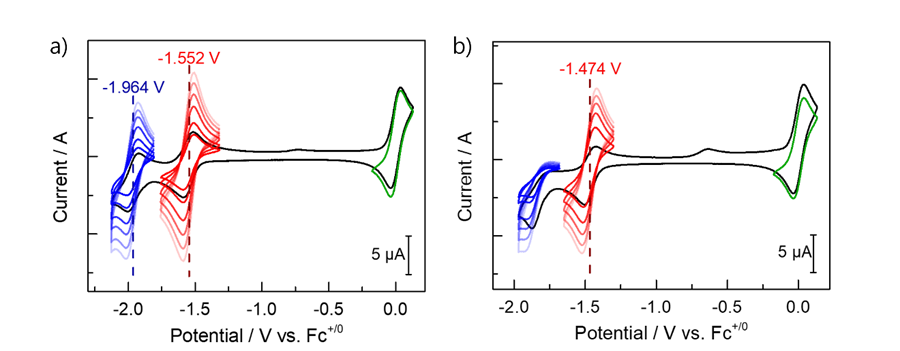


Supplementary Fig 41. a) Cyclic Voltammogram of ZnL1 in various scan rates (gradient-colored lines from dark to light; 100 mV/s to 1 V/s, respectively). Two reversible reductive features associated with the ligand-based reduction were observed at –1.971 V vs Fc0/+ (ZnL1/ZnL1⦁–) (▬, blue) and –1.561 V vs Fc+/0 (ZnL1⦁–/ZnL12–) (▬, red). Fc+/0 reductive feature (▬, green) was also observed after adding an additional amount to ZnL1 (▬, black) at a scan rate of 100 mV/s.; and b) Cyclic Voltammogram of ZnL1_Sr in various scan rates (gradient-colored lines from dark to light; 100 mV/s to 1 V/s, respectively) by adding 5 equivalents of Sr(OTf)2 to ZnL1. The first redox couple for ZnL1_Sr was observed at –1.474 V vs Fc+/0 (ZnL1⦁–/ZnL12) (▬, red) in electrochemically reversible feature, but the second redox couple (ZnL1/ZnL1⦁–) (▬, blue) was changed into irreversible couple after anodic shift from ZnL1. Fc+/0 reductive feature (▬, green) was also observed after adding an additional amount to ZnL1_Sr (▬, black) at a scan rate of 100 mV/s.


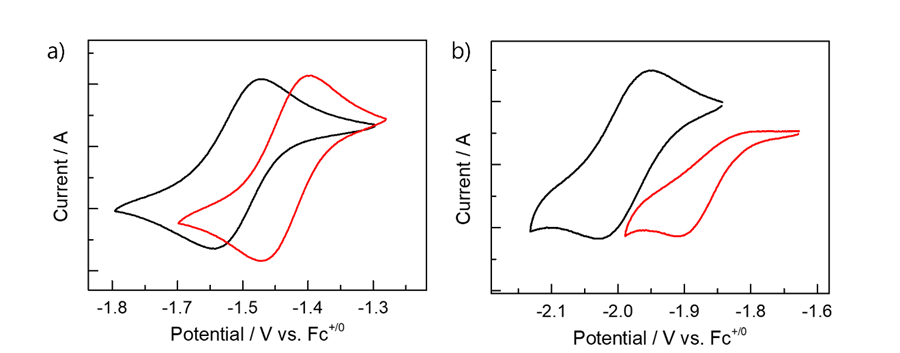


Supplementary Fig 42. Cyclic Voltammograms of ZnL1_Sr (▬, red) are overlayed with ZnL1 (▬, black) to show the shifts of redox potential by adding 5 equivalents of Sr(OTf)2. a) The first reversible redox couple for ZnL1/ZnL1⦁– shows an anodic shift by 78 mV after addition of Sr(OTf)2 from –1.552 V vs Fc+/0(▬, black) to –1.474 V vs Fc+/0(▬, red); and b) the second redox couple for ZnL1⦁–/ZnL12– also shows anodic shifts but unexpectedly, upon the addition of Sr(OTf)2, the electrochemically reversible redox couple for ZnL1⦁–/ZnL12– changes into an irreversible redox couple.


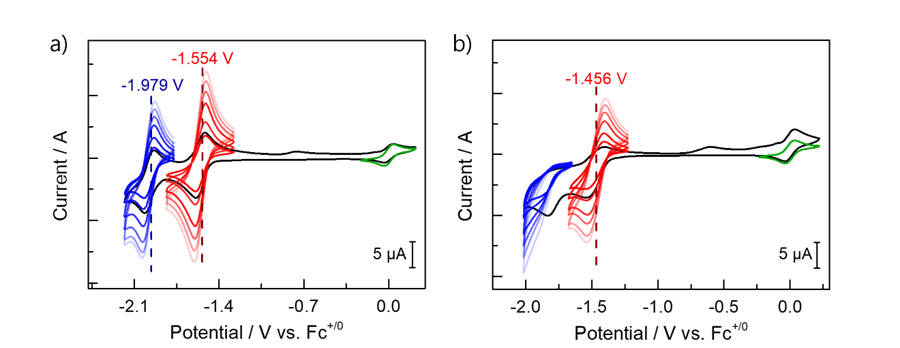


Supplementary Fig 43. a) Cyclic Voltammogram of ZnL1 in various scan rates (gradient-colored lines from dark to light; 100 mV/s to 1 V/s, respectively). Two reversible reductive features associated with the ligand-based reduction were observed at –1.979 V vs Fc+/0 (ZnL1/ZnL1⦁–) (▬, blue) and –1.554 V vs Fc+/0 (ZnL1⦁–/ZnL12–) (▬, red). Fc+/0 reductive feature (▬, green) was also observed by adding an additional amount to ZnL1 (▬, black) at a scan rate of 100 mV/s.; and b) Cyclic Voltammogram of ZnL1_La in various scan rates (gradient-colored lines from dark to light; 100 mV/s to 1 V/s, respectively) by adding 5 equivalents of La(OTf)3 to ZnL1. The first redox couple for ZnL1_La was observed at –1.456 V vs Fc+/0 (ZnL1⦁–/ZnL12–) (▬, red) in electrochemically reversible feature, but the second redox couple (ZnL1/ZnL1⦁–) (▬, blue) was changed into irreversible couple after anodic shift from ZnL1. Fc+/0 reductive feature (▬, green) was also observed by adding an additional amount to ZnL1_La (▬, black) at a scan rate of 100 mV/s.


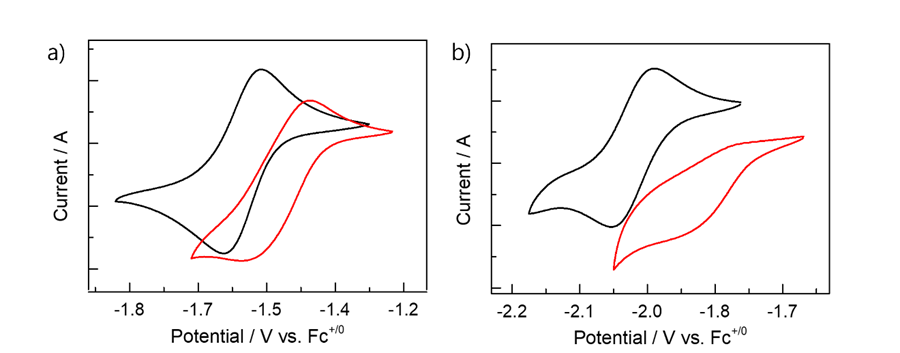


Supplementary Fig 44. Cyclic Voltammograms of ZnL1_La (▬, red) are overlayed with ZnL1 (▬, black) to show the shifts of redox potential by adding 5 equivalents of La(OTf)3. a) The first reversible redox couple for ZnL1/ZnL1⦁– shows an anodic shift of 98 mV after addition of La(OTf)3 from –1.554 V vs Fc+/0(▬, black) to –1.456 V vs Fc+/0(▬, red); and b) the second redox couple for ZnL1⦁–/ZnL12– also shows anodic shifts but unexpectedly, upon the addition of La(OTf)3, the electrochemically reversible redox couple for ZnL1⦁–/ZnL12– changes into an irreversible redox couple.


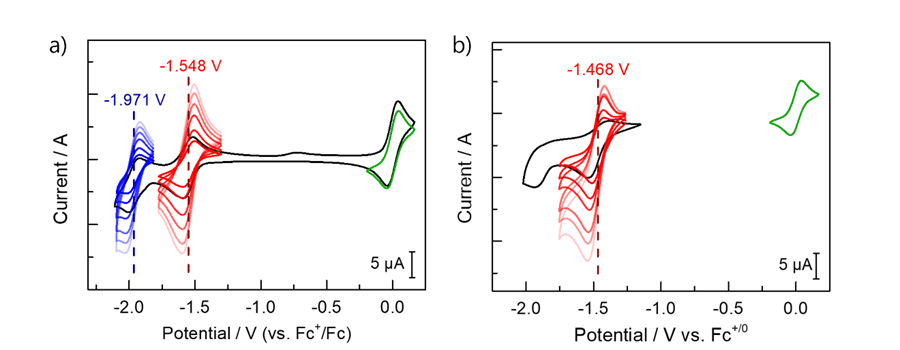


Supplementary Fig 45. a) Cyclic Voltammogram of ZnL1 in various scan rates (gradient-colored lines from dark to light; 100 mV/s to 1 V/s, respectively). Two reversible reductive features associated with the ligand-based reduction were observed at –1.971 V vs Fc+/0(ZnL1/ZnL1⦁–) (▬, blue) and –1.548 V vs Fc+/0(ZnL1⦁–/ZnL12–) (▬, red). Fc+/0 reductive feature (▬, green) was also observed by adding an additional amount to ZnL1 (▬, black) at a scan rate of 100 mV/s.; and b) Cyclic Voltammogram of ZnL1_Eu in various scan rates (gradient-colored lines from dark to light; 100 mV/s to 1 V/s, respectively) by adding 5 equivalents of Eu(OTf)3 to ZnL1. The first redox couple for ZnL1_Eu was observed at –1.468 V vs Fc+/0(ZnL1⦁–/ZnL12–) (▬, red) in electrochemically reversible feature, but the second redox couple (ZnL1/ZnL1⦁–) (▬, blue) was changed into irreversible couple after anodic shift from ZnL1. Fc+/0 reductive feature (▬, green) was also observed by adding an additional amount to ZnL1_Eu (▬, black) at a scan rate of 100 mV/s.


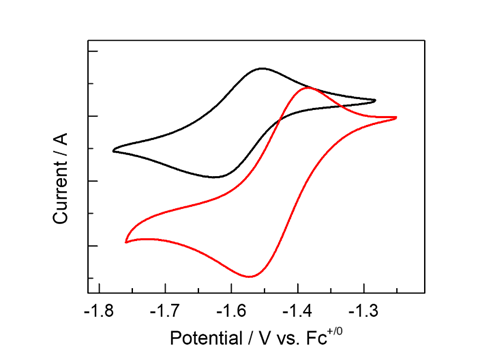


Supplementary Fig 46. Cyclic Voltammograms of ZnL1_Eu (▬, red) are overlayed with ZnL1 (▬, black) to show the shifts of redox potential after adding 5 equivalents of Eu(OTf)3. First reversible redox couple for ZnL1/ZnL1⦁– shows an anodic shift of 80 mV after addition of Eu(OTf)3 from –1.548 V vs Fc+/0(▬, black) to –1.468 V vs Fc+/0(▬, red). And unexpectedly, upon the addition of Eu(OTf)3, the electrochemically reversible redox couple for ZnL1⦁–/ZnL12– changes into an irreversible redox couple.


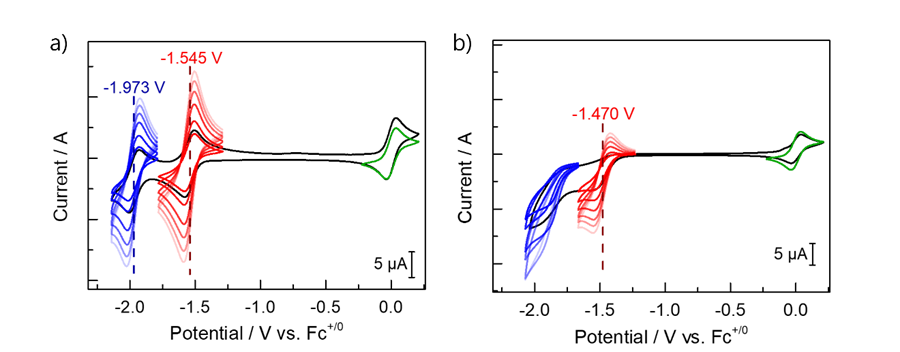


Supplementary Fig 47. a) Cyclic Voltammogram of ZnL1 in various scan rates (gradient-colored lines from dark to light; 100 mV/s to 1 V/s, respectively). Two reversible reductive features associated with the ligand-based reduction were observed at –1.973 V vs Fc+/0(ZnL1/ZnL1⦁–) (▬, blue) and –1.545 V vs Fc+/0(ZnL1⦁–/ZnL12–) (▬, red). Fc+/0 reductive feature (▬, green) was also observed by adding an additional amount to ZnL1 (▬, black) at a scan rate of 100 mV/s.; and b) Cyclic Voltammogram of ZnL1_Y in various scan rates (gradient-colored lines from dark to light; 100 mV/s to 1 V/s, respectively) by adding 5 equivalents of Y(OTf)3 to ZnL1. The first redox couple for ZnL1_Y was observed at –1.470 V vs Fc+/0(ZnL1⦁–/ZnL12–) (▬, red) in electrochemically reversible feature, but the second redox couple (ZnL1/ZnL1⦁–)(▬, blue) was changed into irreversible couple after anodic shift from ZnL1. Fc+/0 reductive feature (▬, green) was also observed by adding an additional amount to ZnL1_Y (▬, black) at a scan rate of 100 mV/s.


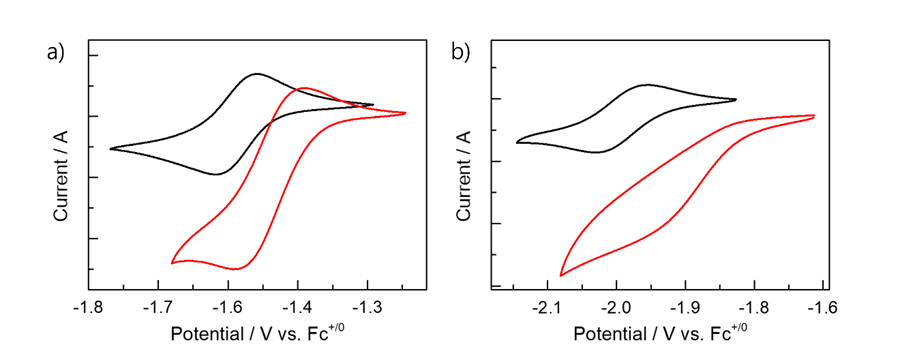


Supplementary Fig 48. Cyclic Voltammograms of ZnL1_Y (▬, red) are overlayed with ZnL1 (▬, black) to show the shifts of redox potential after adding 5 equivalents of Y(OTf)3. a) first reversible redox couple for ZnL1/ZnL1⦁– shows an anodic shift of 75 mV after addition of Y(OTf)3 from –1.545 V vs Fc+/0(▬, black) to –1.470 V vs Fc+/0(▬, red); and b) second redox couple for ZnL1⦁–/ZnL12– also shows anodic shifts but unexpectedly, upon the addition of La(OTf)3, the electrochemically reversible redox couple for ZnL1⦁–/ZnL12– changes into an irreversible redox couple.

Table S9. Summary of Electrochemical Data for ZnL1

| metal ions | Observed E1/2 for **L1/L1⦁–** (V) |
| --- | --- |
| Li+ | 0.033 |
| Na+ | 0.039 |
| K+ | 0.031 |
| Ca2+ | 0.065 |
| Ba2+ | 0.073 |
| Sr2+ | 0.078 |
| Y3+ | 0.075 |
| Eu3+ | 0.080 |
| La3+ | 0.098 |

## Cyclic Voltammetry Study in **ZnL2** with Cation

In an N2-filled glove box, TBAPF6(155 mg, 400 µmol) was dissolved in 4.0 mL of anhydrous CH3CN to give a 0.10 M TBAPF6 solution. After scanning the solvent window to ensure the absence of any possible impurities, a 1.0 mM of **ZnL2** solution was prepared for cyclic voltammetry. All scans were referenced to the Fc+/0 couple at 0.0 V after adding an equimolar amount of Fc to the solution for all samples measured below. The cyclic voltammogram of **ZnL2** was measured at various scan rates (100, 200, 400, 600, 800, 1000 mV/s) in a 0.10 M TBAPF6 solution in dry acetonitrile under N2.


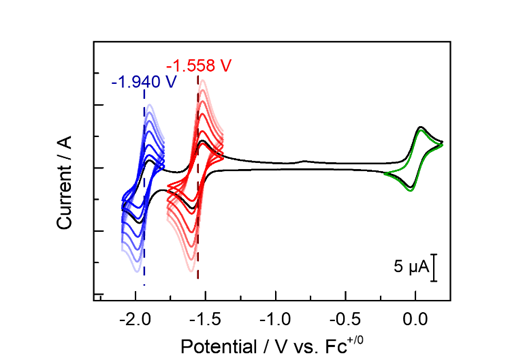


Supplementary Fig 49. Cyclic Voltammogram of ZnL2 at various scan rates (gradient-colored lines from dark to light; 100 mV/s to 1 V/s, respectively). Two reversible reductive features associated with the ligand-based reduction were observed at –1.940 V vs Fc+/0 (ZnL2/ZnL2⦁–) (▬, blue) and –1.548 V vs Fc+/0 (ZnL2⦁–/ZnL22–) (▬, red). Scan-rate dependent cyclic voltammetry of ZnL2 also showing a porphyrin-ring-centered reduction waves upon incorporation of redox-inactive metal, similar to that observed in ZnL1. Fc+/0 reductive feature (▬, green) was also observed by adding an additional amount of ferrocene to ZnL2 (▬, black) at a scan rate of 100 mV/s. When compared with the average values obtained from a total of 9 measurements of ZnL1, the first reduction potential consistently appears at nearly the same position as ZnL1(; –1.550 V vs Fc+/0), and the second reduction potential exhibits an anodic shift of approximately 30 mV compared to ZnL1(; –1.970 V vs Fc+/0).

To observe the changes in redox potential of the system compared with **ZnL1**, 5- equivalent amounts of KOTf was added subsequently to the **ZnL2** solution shown in **Supplementary Fig 49**. KOTf was prepared by dissolving it (4.0 µmol) in 0.2 mL of a 0.1 M TBAPF6 electrolyte stock solution and then adding it to the **ZnL2** solution.


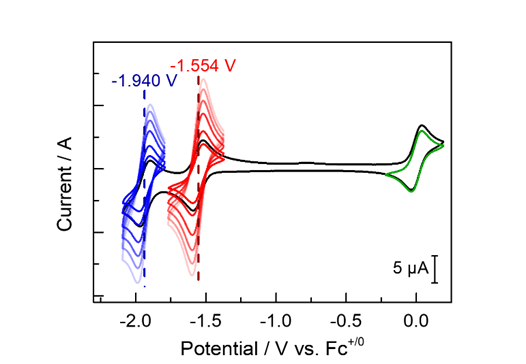


Supplementary Fig 50. Cyclic Voltammogram of ZnL2_K at various scan rates (gradient-colored lines from dark to light; 100 mV/s to 1 V/s, respectively) after adding 5 equivalents of KOTf to ZnL2. Two reversible reductive features associated with the ligand-based reduction were observed at –1.925 V vs Fc+/0 (ZnL2/ZnL2⦁–) (▬, blue) and –1.528 V vs Fc+/0 (ZnL2⦁–/ZnL22–) (▬, red). Fc+/0 reductive feature (▬, green) was also observed by adding an additional amount of ferrocene to ZnL2_K (▬, black) at a scan rate of 100 mV/s.


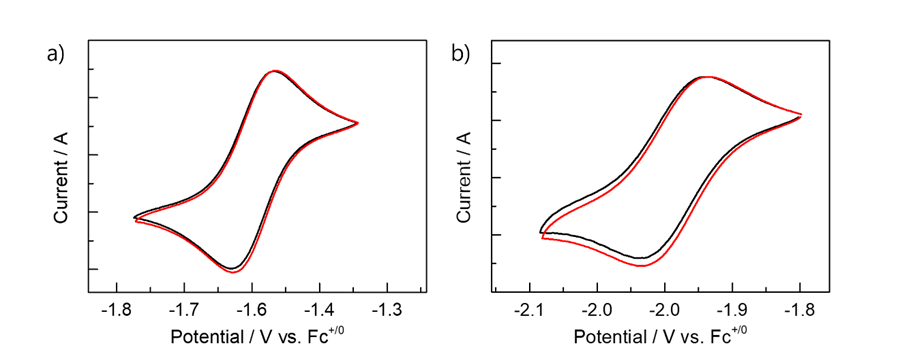


Supplementary Fig 51. Cyclic Voltammograms of ZnL2_K (▬, red) are overlayed with ZnL2 (▬, black) to show the shifts of redox potential after adding 5 equivalents of KOTf. a) The first reversible redox couple for ZnL2/ZnL2⦁– shows almost no shift after addition of KOTf from –1.548 V vs Fc+/0 (▬, black) to –1.528 V vs Fc+/0 (▬, red); b) the second redox couple for ZnL2⦁–/ZnL22– also shows almost no shifts, from –1.940 V vs Fc+/0 (▬, black) to –1.925 V vs Fc+/0 (▬, red).

## Cyclic Voltammetry Study in **ZnTF10PP** with Cation

In an N2-filled glove box, TBAPF6 (155 mg, 400 µmol) was dissolved in 4.0 mL of anhydrous CH3CN to give a 0.10 M TBAPF6 solution. After scanning the solvent window to ensure the absence of any possible impurities, a 1.0 mM of **ZnTF10PP** solution was prepared for cyclic voltammetry. All scans were referenced to the Fc+/0 couple at 0.0 V after adding an equimolar amount of Fc to the solution for all samples measured below. The cyclic voltammogram of **ZnTF10PP** was measured at various scan rates (100, 200, 400, 600, 800, 1000 mV/s) in a 0.10 M TBAPF6 solution in anhydrous CH3CN under N2.


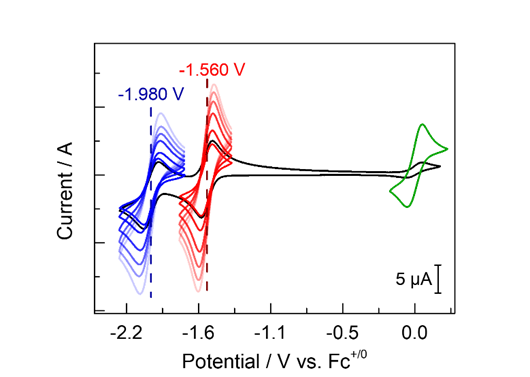


Supplementary Fig 52. Cyclic Voltammogram of ZnTF10PP at various scan rates (gradient-colored lines from dark to light; 100 mV/s to 1 V/s, respectively). Two reversible reductive features associated with the ligand-based reduction were observed at –1.980 V vs Fc+/0 (ZnTF10PP/ZnTF10PP⦁–) (▬, blue) and –1.560 V vs Fc+/0 (ZnTF10PP⦁–/ZnTF10PP2–) (▬, red). Scan-rate-dependent cyclic voltammetry of ZnTF10PP shows porphyrin-ring-centered reduction waves along with the electroactivity of the complexed metal cation for redox-active metal centers. Fc+/0 reductive feature (▬, green) was also observed by adding an additional amount of ferrocene to ZnTF10PP (▬, black) at a scan rate of 100 mV/s. When compared with the average values obtained from a total of 9 measurements of ZnL1, the first and the second reduction potentials both show a difference within 10 mV, indicating that they are almost identical with ZnL1 which means TF10PP has similar electronic properties to L1.

To observe the changes in redox potential of the system compared with **ZnL1**, we subsequently added KOTf in 5 equivalents to the **ZnLTF10PP** solution shown in **Supplementary Fig 52**. KOTf was prepared by dissolving 4.0 µmol in 0.2 mL of a 0.1 M TBAPF6 electrolyte stock solution and then added to the **ZnTF10PP**.


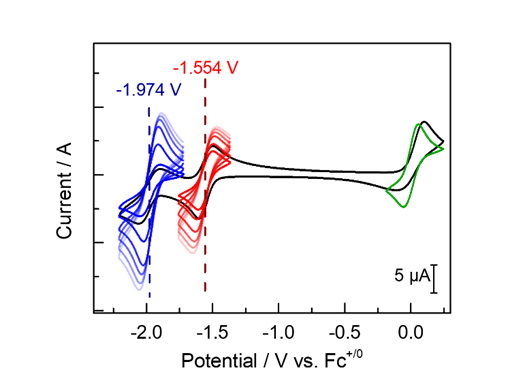


Supplementary Fig 53. Cyclic Voltammogram of ZnTF10PP_K at various scan rates (gradient-colored lines from dark to light; 100 mV/s to 1 V/s, respectively) after adding 5 equivalents of KOTf to ZnTF10PP. Two reversible reductive features associated with the ligand-based reduction were observed at –1.974 V vs Fc+/0 (ZnTF10PP/ZnTF10PP⦁–) (▬, blue) and –1.554 V vs Fc+/0 (ZnTF10PP⦁–/ZnTF10PP2–) (▬, red). Fc+/0 reductive feature (▬, green) was also observed by adding an additional amount of ferrocene to ZnTF10PP_K (▬, black) at a scan rate of 100 mV/s.


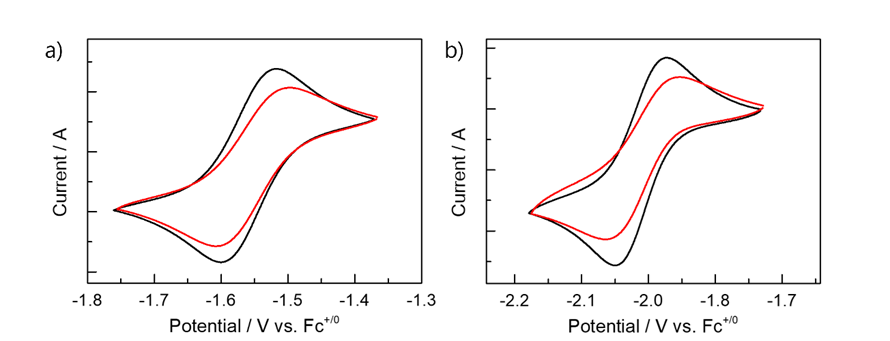


Supplementary Fig 54. Cyclic Voltammograms of ZnTF10PP_K (▬, red) is overlayed with ZnTF10PP (▬, black) to show the shifts of redox potential after adding 5 equivalents of KOTf. a) The first reversible redox couple for ZnTF10PP/ZnTF10PP⦁– shows almost no shift after addition of KOTf from –1.560 V vs Fc+/0 (▬, black) to –1.554 V vs Fc+/0 (▬, red); b) the second redox couple for ZnTF10PP⦁–/ZnTF10PP2– also shows almost no shifts, from –1.980 V vs Fc+/0 (▬, black) to –1.974 V vs Fc+/0 (▬, red).

## Inductive Effect Study in UV-vis Experiments with **L1** and **ZnL1**


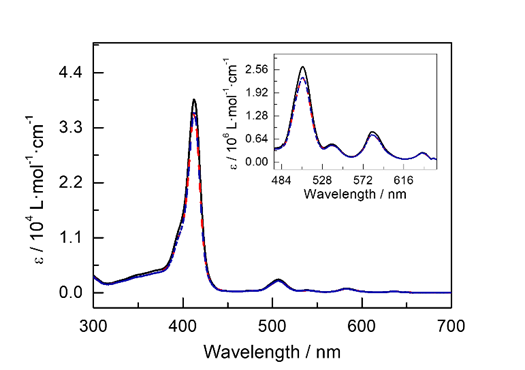


Supplementary Fig 55. UV-vis spectra were recorded for 5.0 μM L1 (▬, black) in CH3CN at 23 ℃. The spectra were then measured after the addition of 20 equivalents of KOTf (▬, red), and Ca(OTf)2 (▬, blue).


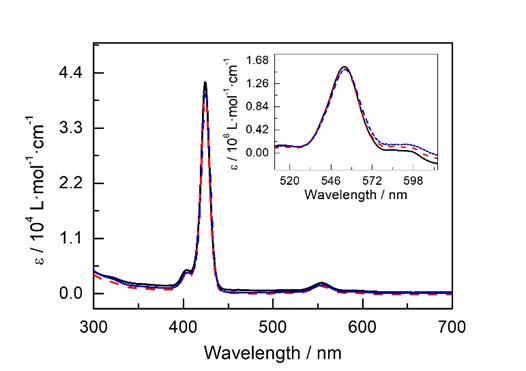


Supplementary Fig 56. UV-vis spectra were recorded for 5.0 μM ZnL1 (▬, black) in CH3CN at 23 ℃. The spectra were then measured after the addition of 20 equivalents of KOTf (▬, red), and Ca(OTf)2 (▬, blue) .


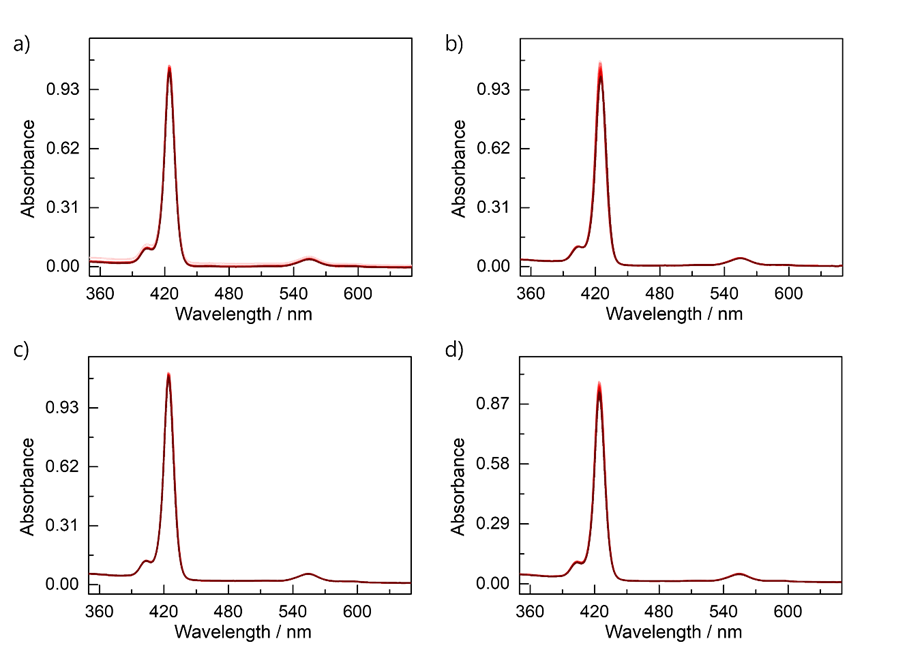


Supplementary Fig 57. UV-vis spectra of 2.5 μM ZnL1 (▬, black) in *N,N*-dimethylformamide at 23 ℃ were recorded. Spectral changes were monitored following the addition of various cations in concentrations ranging from 0.1 to 20 equivalents (0.10, 1.0, 2.0, 5.0, 10, and 20 equiv): a) KOTf, b) Ba(OTf)2 c), Eu(OTf)3 and d) KBArF.

## Stark Effect Study using IR spectroscopy with **ZnL1**–**CN_K** by Adding Cryptand-[2,2,2] and Cations


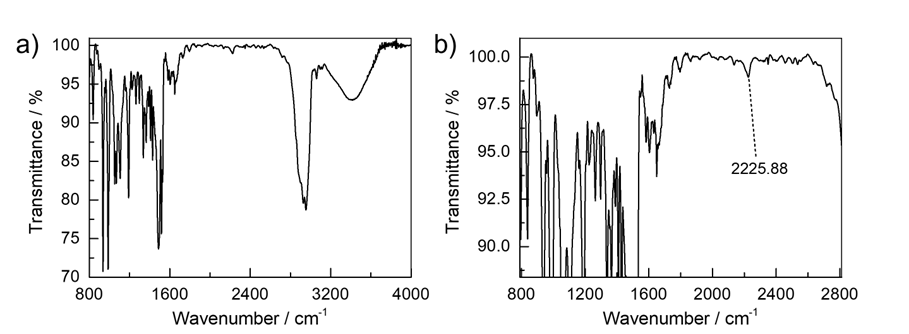


Supplementary Fig 58. The IR spectrum of ZnL1–CN_K (▬, black), for which the crystal structure was obtained, shows a C≡N stretching vibration at 2225.88 cm-1.


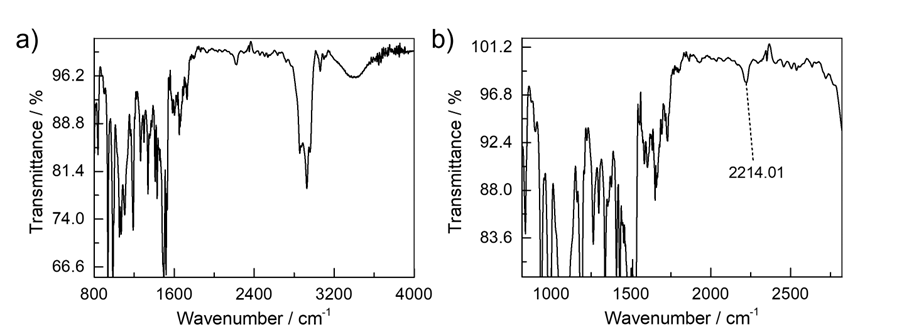


Supplementary Fig 59. The IR spectrum of ZnL1–CN (▬, black) was measured after adding 2 equivalents of cryptand-[2,2,2] to ZnL1–CN_K. The C≡N stretching was observed at 2214.01 cm-1.


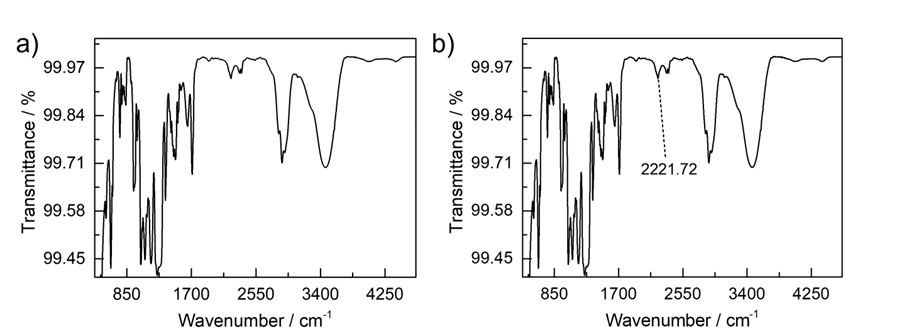


Supplementary Fig 60. The IR spectrum of ZnL1–CN_Ca(OTf)2 (▬, black) was measured after adding 2 equivalents of Ca(OTf)2 to ZnL1–CN_K with 2 equivalents of cryptand-[2,2,2]. The C≡N stretching was observed at 2221.72 cm-1.

# Optical Kinetic Data: UV-vis Spectroscopic Experimental Results

## Catalytic Oxygen Reduction Kinetics by UV-vis Spectroscopic Experiments

In an N2-filled glove box, a solution of **FeL1**–**Cl** (20 µM in CH2Cl2 containing 1% (*v/v*) DMF) was prepared for UV-vis spectroscopy. A 4-mL air-tight UV-vis cuvette was charged with 3.0 mL of the **FeL1**–**Cl** solution (20 µM, 60 nmol, 1.0 equiv), and sealed tightly with an air-tight rubber septum. The cuvette was brought out of the glove box, and placed in a UNISOKU device, set to maintain the temperature at –80 °C. After reaching thermal equilibrium, a 50 µL solution of decamethylferrocene (Fc*) solution (3.6 mM in CH2Cl2, 0.18 µmol, 3.0 equiv) was prepared in a N2-filled glove box, and injected to the **FeL1**–**Cl** solution via an N2-purged syringe. After 30 min, complete conversion to **FeIIL1** was observed (**Supplementary Fig. 61**). When the same reaction was conducted at –40 °C, full conversion was achieved within 1-2 min.


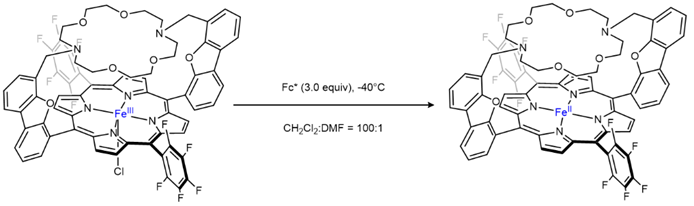


Supplementary Scheme . Preparation of FeIIL1 via reduction of FeL1–Cl with 3.0 equivalents of Fc*.


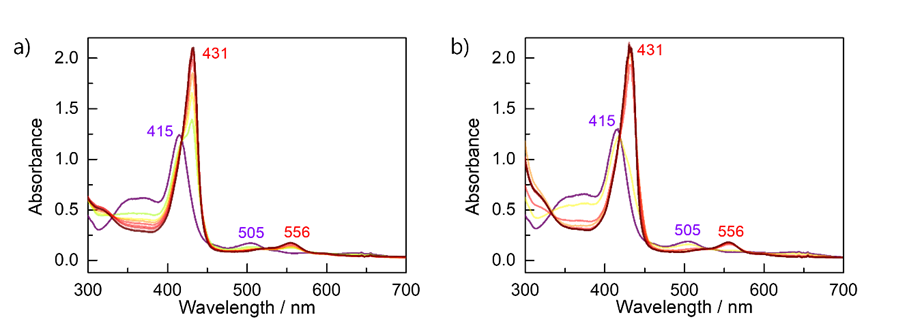


Supplementary Fig 61. Optical spectra showing the reaction forming FeIIL1 (▬, dark red) from FeL1–Cl (▬, purple) upon the addition of 3 equivalents of Fc* a) at –80 °C and b) at –40 °C with both conditions yielding identical results. The reaction time course is represented by a rainbow gradient. The Soret band exhibits a red shift from 415 nm to 431 nm, while the Q-band shifts from 506 nm to 556 nm. These spectral shifts indicate the formation of FeIIL1, following a trend consistent with the reference data.

Anhydrous O2 (dried for 4 h by CaCl2, specified volume, standard = 1.0 mL, 41 µmol, 680 equiv) was delivered *via* syringe to the **FeIIL1** solution shown in **Supplementary Fig. 61** at –40 °C, generating bubbles to facilitate rapid equilibrium between the headspace and the solution. To investigate the O2 dependence of the reaction, UV-vis traces were recorded under different conditions following the addition of O2 in volumes ranging from 1.0 to 2.5 mL. Kinetic data was obtained by monitoring the absorption band at 433 nm, and *k*obs values were determined using a pseudo-first order fit of the data. Each experiment was repeated three times and the *k*obs values were calculated based on the average results.


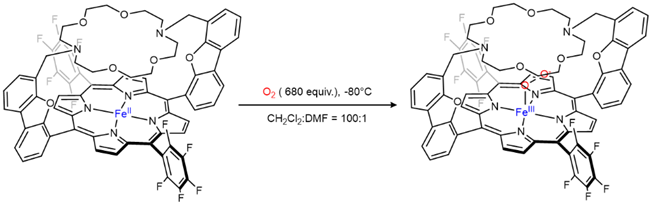


Supplementary Scheme . Formation of FeIIIL1–OO from FeIIL1 by adding an excess of O2 to FeIIL1 at –80 °C.


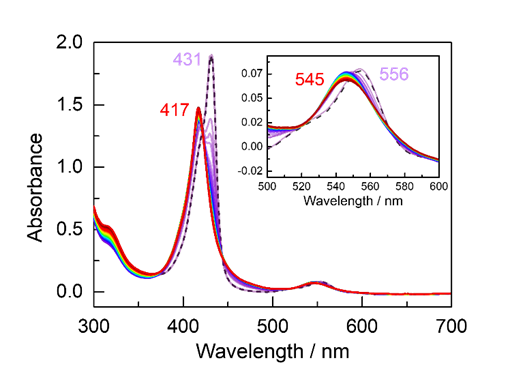


Supplementary Fig 62. Optical spectra showing the reaction forming FeIIIL1–OO (▬, dark red) from FeIIL1 (▬, purple) upon the addition of 1.0 mL of O2 at –80 °C. The reaction time course is represented by a gradient. The Soret band exhibits a blue shift from 431 nm to 417 nm, while the Q-band shifts from 556 nm to 545 nm, as depicted in the inset graph. These spectral shifts indicate the formation of FeIIIL1–OO, following a trend consistent with the reference data.


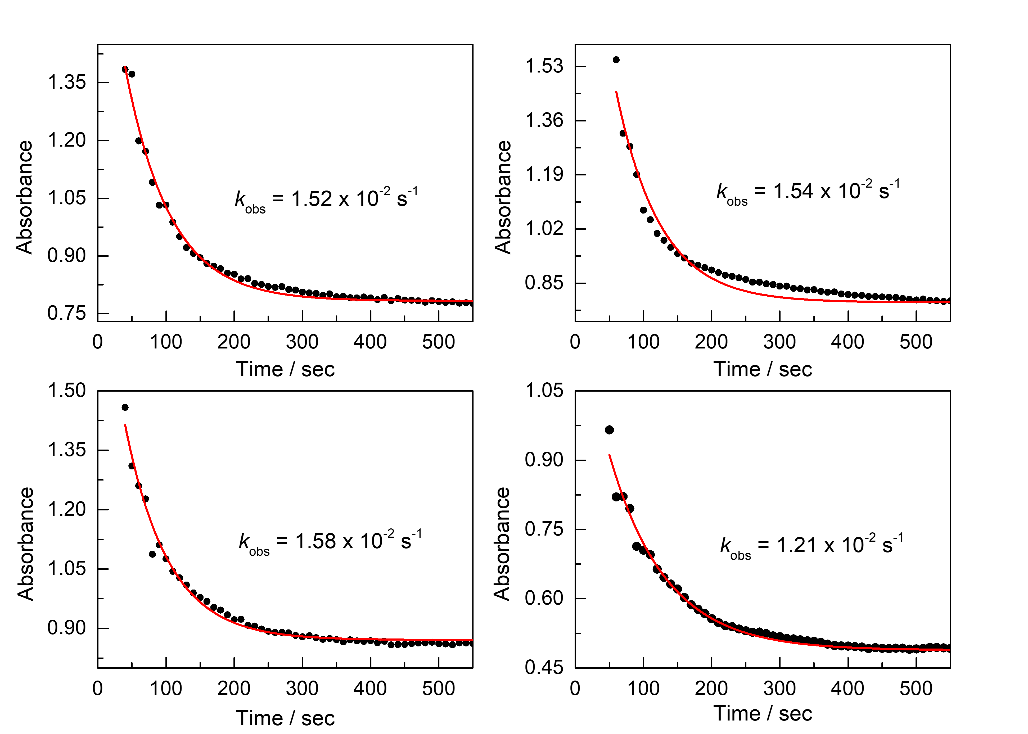


Supplementary Fig 63. Representative time course of the reaction between FeIIL1 and 1.0 mL of O2 at –80 °C. The experiment was repeated three times to obtain the average value of *k*obs for the reaction (*k*obs = 1.5(2) × 10–2 s–1).


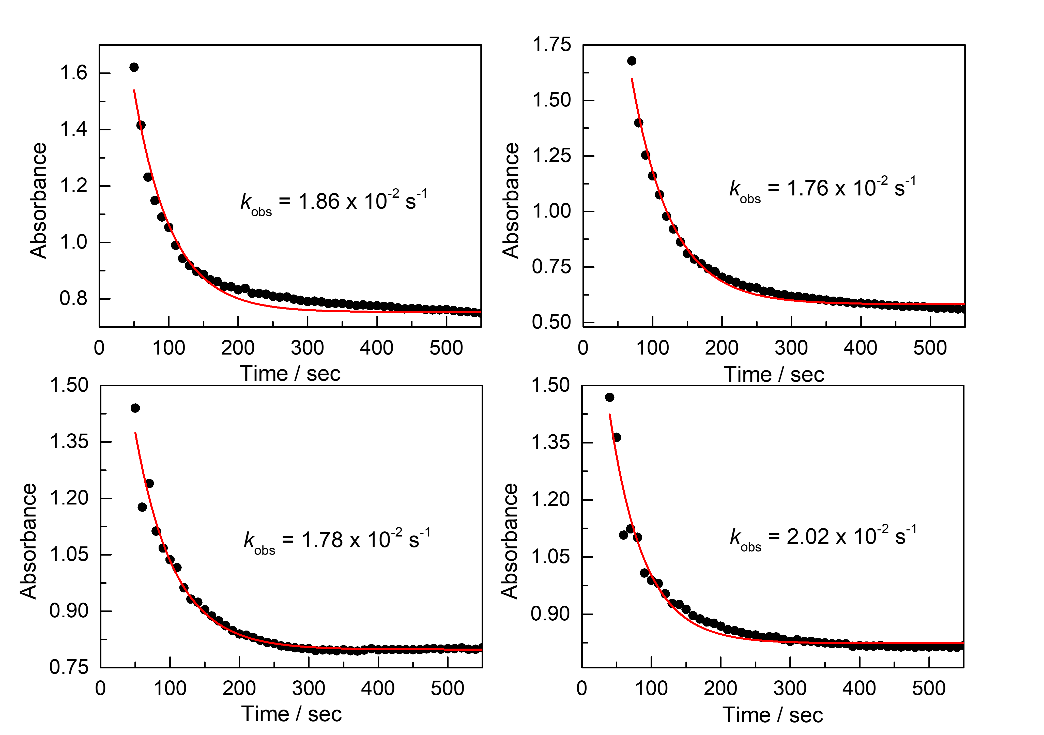


Supplementary Fig 64. Representative time course of the reaction between FeIIL1 and 1.5 mL of O2 at –80 °C. The experiment was repeated three times and obtained the average value of *k*obs for the reaction (*k*obs = 1.9(1) × 10–2 s–1).


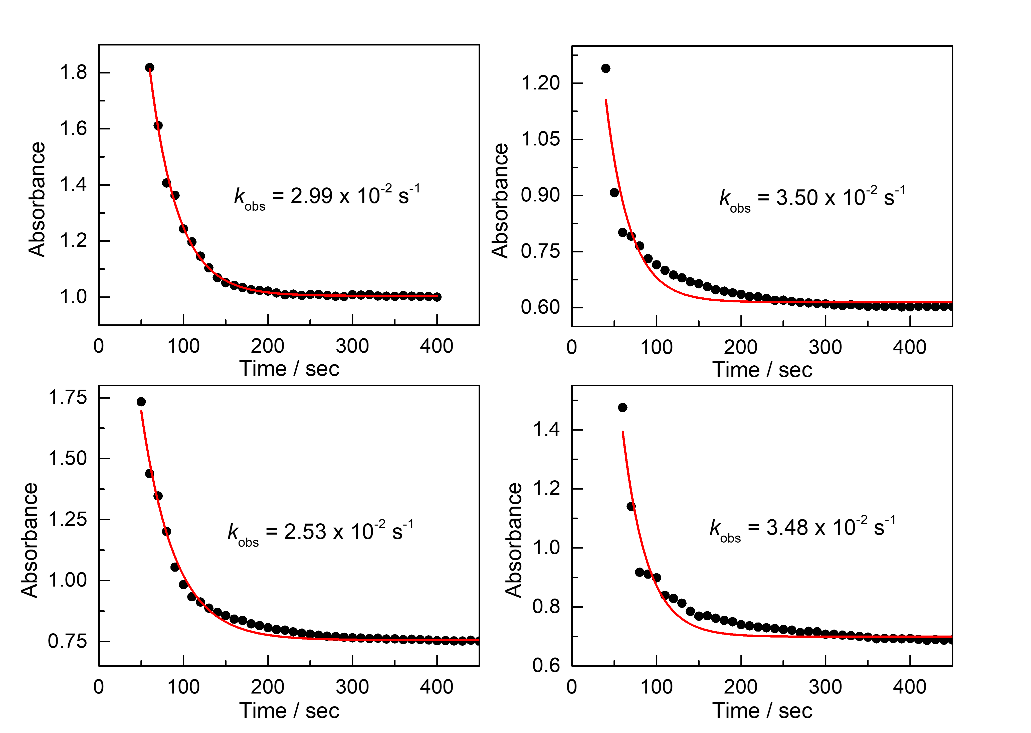


Supplementary Fig 65. Representative time course of the reaction between FeIIL1 and 2.0 mL of O2 at –80 °C. The experiment was repeated three times and obtained the average value of *k*obs for the reaction (*k*obs = 3.1(5) × 10–2 s–1).


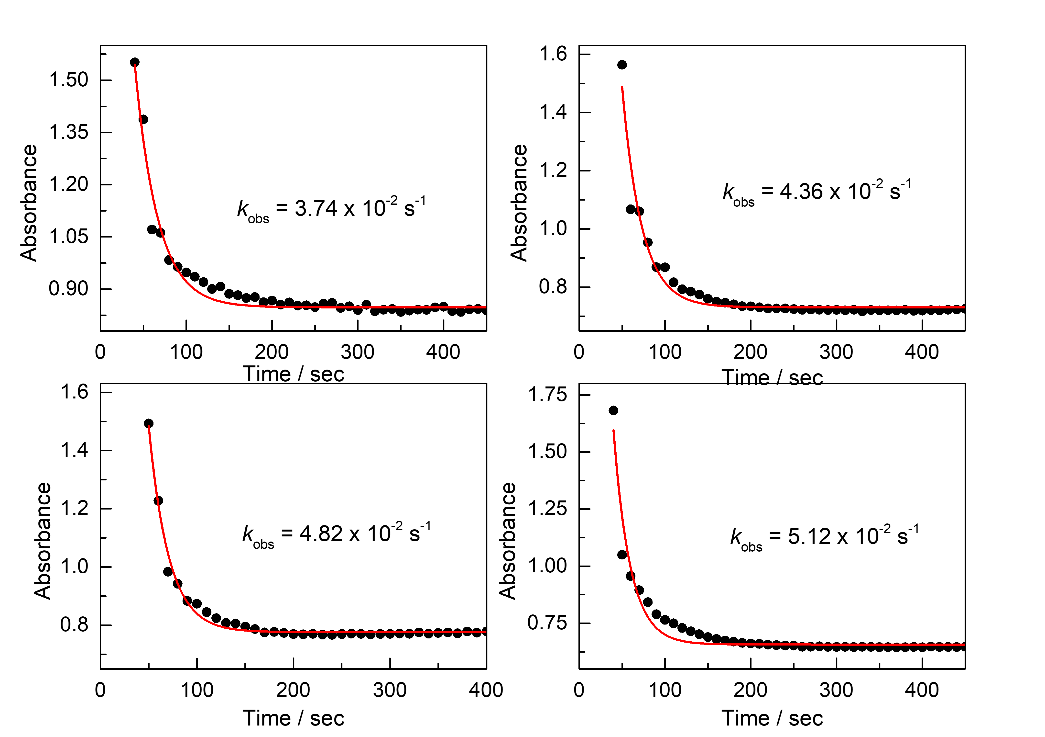


Supplementary Fig 66. Representative time course of the reaction between FeIIL1 and 2.5 mL of O2 at –80 °C. The experiment was repeated three times and obtained the average value of *k*obs for the reaction (*k*obs = 4.5(6) × 10–2 s–1).


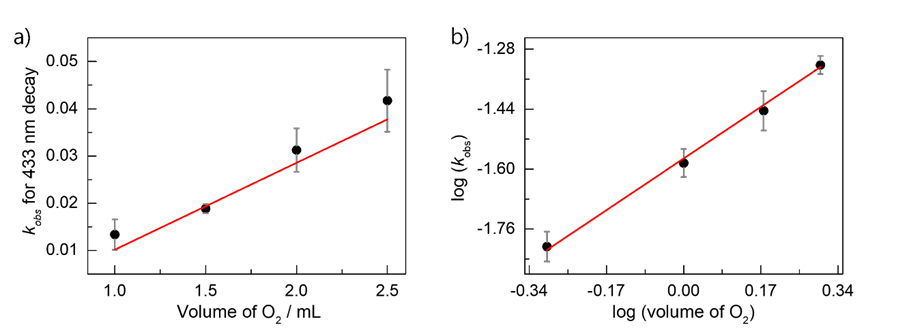


Supplementary Fig 67. a) The relationship between the volume of O2 (VO2) added to FeIIL1 and the reaction rate constant(*k*obs) indicates a proportional correlation. b) The plot of log(VO2) versus log(*k*obs) shows a slope of approximately 0.88 (R2=0.996), confirming that the reaction follows first-order kinetics with respect to VO2.

Subsequently, to investigate the O2 dependence in the presence of a cation, the same experiments were repeated under identical conditions with the addition of Sc(OTf)3. As in the previous experiments, the **FeL1**–**Cl** was confirmed at –80 °C. Then after reaching temperature equilibrium, a 50 µL solution of Sc(OTf)3 (6.0 mM in *N*,*N*-dimethylformamide, 0.30 µmol, 5.0 equiv.) was prepared in an N2-filled glove box, and delivered to the solution via an N2-purged syringe. These conditions are identical to the composition of the electrocatalytic ORR experimental setup. The equilibrium binding of Sc(OTf)3 to **FeL1**–**Cl** was confirmed by the stabilization of the UV-vis spectrum. Subsequently, Fc* was added to generate the **FeIIL1** under the same conditions as the previous study, followed by the addition of O2 to perform kinetic experiments on O2 binding. In the presence of Sc(OTf)3, the O2 binding reaction proceeded at a significantly faster rate compared to the reaction without a cation, making it difficult to obtain reliable kinetic data when more than 2.5 mL of O2 was added. As a result, O2 addition was limited to a range of 0.50 to 2.0 mL.


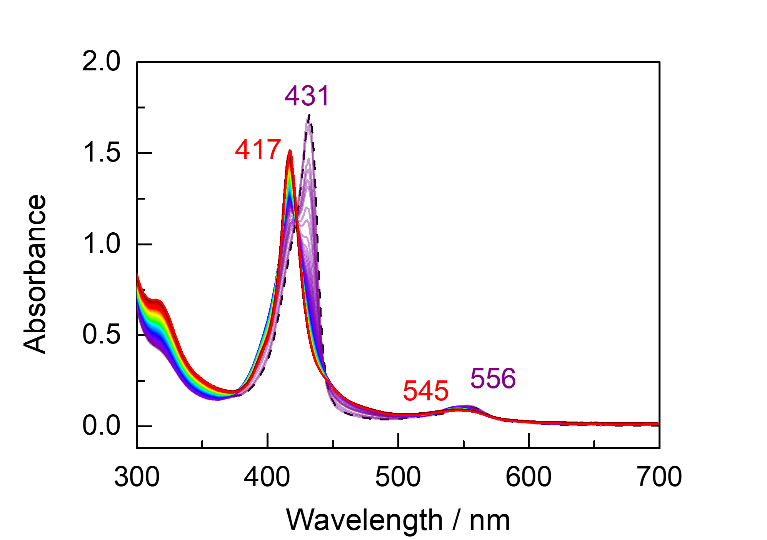


Supplementary Fig 68. Optical spectra of the reaction forming FeIIIL1–OO (▬, dark red) from FeIIL1 (▬, purple) with 5.0 equivalents of Sc(OTf)3 upon the addition of 1.0 mL of O2 at –80 °C. The reaction time course is represented by a rainbow gradient. The Soret band exhibits a red shift from 431 nm to 417 nm, while the Q-band shifts from 556 nm to 545 nm. These spectral shifts indicate the formation of the FeIIIL1–OO, following a trend consistent with the Supplementary Fig 62.

Supplementary Fig 69. Representative time course of the reaction between FeIIL1 in the presence of Sc(OTf)3 and 0.5 mL of O2 at –80 °C. The experiment was repeated three times and obtained the average value of *k*obs for the reaction (*k*obs = 1.2(3) × 10–2 s–1).

Supplementary Fig 70. Representative time course of the reaction between FeIIL1 in the presence of Sc(OTf)3 and 1.0 mL of O2 at –80 °C. The experiment was repeated three times and obtained the average value of *k*obs for the reaction (*k*obs = 2.5(3) × 10–2 s–1).

Supplementary Fig 71. Representative time course of the reaction between FeIIL1 in the presence of Sc(OTf)3 and 1.5 mL of O2 at –80 °C. The experiment was repeated three times and obtained the average value of *k*obs for the reaction (*k*obs = 3.6(4) × 10–2 s–1).

Supplementary Fig 72. Representative time course of the reaction between FeIIL1 in the presence of Sc(OTf)3 and 2.0 mL of O2 at –80 °C. The experiment was repeated three times and obtained the average value of *k*obs for the reaction (*k*obs = 4.8(3) × 10–2 s–1).

Supplementary Fig 73. a) The relationship between the volume of O2 added to FeIIL1 in the presence of Sc(OTf)3 and the reaction rate constant(*k*obs) indicates a proportional correlation. b) The plot of log(VO2) versus log(*k*obs) shows a slope of approximately 1.26 (R2=0.998), confirming that the reaction follows first-order kinetics with respect to VO2 as same as in the absence of Sc3+.

## Investigation of ORR Intermediates Through Stoichiometric UV-vis Experiments.

A follow-up experiment was conducted to further investigate the reaction of **FeIIIL1–OO** converting to **FeIIIL1–OOH** and analyzed by UV-vis spectroscopy (**Supplementary Scheme 20**). To remove excess O2 remaining in the cuvette headspace after the reaction, N2 bubbling was performed for approximately 30 minutes at –80 °C. After confirming that the initial **FeIIIL1–OO** UV-vis features remained unchanged (**Supplementary Fig 74**. **a**), 50 µL of MeOH (12.3 µmol, 205 equiv) was added as a proton source. The results confirmed that **FeIIIL1–OO** underwent protonation upon the addition of the reductant, a 50 µL solution of CoCp2 (6.0 mM in CH2Cl2, 0.30 µmol, 5.0 equiv) at –80 °C, leading to the formation of **FeIIIL1–OOH** (**Supplementary Fig 74**. **c**).

Supplementary Scheme . Formation of FeIIIL1–OOH from FeIIIL1–OO by adding an excess of MeOH as a proton source and CoCp2 as a reductant at –80 °C.

Supplementary Fig 74. a) Optical spectra showing results after N2 bubbling for 30 min to remove the excess O2 at –80 °C from FeIIIL1–OO (▬, green) with no changes observed (▬, purple to red gradient). b) After the addition of MeOH at –80 °C (▬, red), no changes were observed in the optical spectrum, indicating that no reaction occurred and FeIIIL1–OO (▬, black) remained stable. c) After the addition of CoCp2 at –80 °C (▬, red) to the FeIIIL1–OO in the presence of MeOH (▬, black), the Soret band exhibits a blue shift from 421 nm to 417 nm, while the Q-band shifts from 561 nm to 557 nm. These spectral shifts indicate the formation of FeIIIL1–OOH, following a trend consistent with the reference data.

# Quantitative Analysis of H2O2 Formed by UV-vis Spectroscopy

Complementary to the rotating ring-disk voltammetry (RRDV) studies presented in **Section 9.3**, stoichiometric, non-electrochemical investigations were conducted using UV-vis spectroscopy to further corroborate the finding that cationic species significantly influence H2O2 production pathways and thereby modulate the overall selectivity of oxygen reduction. In these controlled experiments, potassium superoxide (KO2) was strategically introduced to **FeL1–Cl** in the presence of excess decamethylferrocene (Fc*), generating the key **FeIIIL1–OO** intermediate. Trifluoroethanol was employed as the proton source to maintain consistency with the conditions utilized in our electrochemical ORR studies.

Supplementary Scheme . The proposed mechanism in the addition of acid to FeIIIL1–OO– leads to the formation of FeIVL1=O and FeIIIL1+, with the release of H2O and H2O2.

## Stoichiometric UV-vis Experiments from Iron Peroxo Complex

Supplementary Scheme . The reaction equation was conducted to analyze the %H2O2 selectivity of the stoichiometric oxygen reduction reaction via UV–vis spectroscopy for FeL1–Cl.

In an N2-filled glove box, a 4-mL air-tight UV-vis cuvette was charged with 3.0 mL of **FeL1–Cl** solution (20 µM, 60 mmol, 1.0 equiv) and sealed with an air-tight rubber septum. The cuvette was transferred to a UNISOKU temperature control apparatus maintained at –80 °C. After reaching thermal equilibrium, 50 µL of KO2 solution (3.0 mM in DMF, 0.12 µmol, 2.0 equiv), prepared under anaerobic conditions, was injected via a N2-purged syringe. Complete conversion to **FeIIIL1–OO** was observed after 15 minutes, as confirmed by UV-vis spectroscopy (**Supplementary Fig 75. a**).

**FeIIIL1–OO**species was then reduced by adding 60 µL of Fc* solution (7.0 mM in CH2Cl2, 0.42 µmol, 7.0 equiv) at –40 °C, generating **FeIIIL1–OO–** (**Supplementary Fig 75. b**). Subsequently, addition of 60 µL trifluoroethanol (TFE) (0.10 M, 6.0 µmol, 100 equiv) at –40 °C caused the characteristic spectroscopic features of **FeIIIL1–OO–** to rapidly disappear. Upon gradual warming to 25 °C, the reaction proceeded through an **FeIVL1=O** intermediate before ultimately converting to **FeIIIL1+** (**Supplementary Fig. 76**).

Supplementary Fig 75. a) Optical spectra showing the reaction forming FeIIIL1–OO (▬, dark red) from FeL1–Cl (▬, purple, dash) upon the addition of 2 equivalents of KO2. The Soret band at 416 nm increased, while the Q-band shifted from 505 to 552 nm. These spectral shifts indicate the formation of the side-on peroxo complex, FeIIIL1–OO, following a trend consistent with the reference data. b) Optical spectra showing the reaction forming FeIIIL1–OO– (▬, dark red) from the peroxo complex, FeIIIL1–OO (▬, purple), upon the addition of 7 equivalents of Fc*. The reaction time course is represented by a gradient. The Soret band exhibits a red shift from 416 to 418 nm, while the Q-band changed shown in the inset graph. No distinct optical changes were observed; however, the spectral trend remains consistent with reference data, thereby supporting the formation of FeIIIL1–OO–.

Supplementary Fig 76. Optical spectra showing the reaction forming FeIVL1=O (▬, dark red) from FeIIIL1–OO– (▬, black) upon the addition of 60 µL of TFE. The Soret band at 416 nm decreased and shifted to 412 nm, while the Q-band shifted from 552 to 582 nm. These spectral shifts indicate the formation of FeIVL1=O with TFE, following a trend consistent with the reference data.

Supplementary Scheme . A stoichiometric reaction study was conducted to analyze the %H2O2 selectivity of the stoichiometric oxygen reduction reaction via UV–vis spectroscopy for FeL1–Cl with cryptand-[2,2,2] and triflate salts (KOTf, and Sc(OTf)3) to investigate the cation-induced effect.

Having established optimal conditions for monitoring H2O and H2O2 generation from the reaction of TFE with **FeIIIL1–OO** species, we next investigated the influence of cations on reaction selectivity. Two parallel experimental protocols were developed:

1. **Cation-free conditions:** After forming **FeIIIL1–OO**, 50 µL of cryptand-[2,2,2] (3.0 mM in CH2Cl2, 0.15 µmol, 2.0 equiv) was added at –40 °C. The resulting **FeIIIL1–OO**– complex (**Supplementary Scheme 23)** exhibited remarkable stability at –40 °C, remaining unchanged for over an hour (**Supplementary Fig. 77a**). Addition of TFE under these conditions triggered the decomposition reaction pathway previously characterized (**Supplementary Fig. 76)**, as demonstrated in **Supplementary Fig. 77b**.
2. **Cation-influenced conditions:** For comparison, 50 µL of triflate salt solutions (KOTf, or Sc(OTf)3) (7.5 mM in DMF, 0.38 μmol, 5.0 equiv) was introduced at –80 °C to the **FeIIIL1–OO**– species in the presence of cryptand-[2,2,2]. The **FeIIIL1–OO**– complex maintained its stability under these conditions as well (**Supplementary Fig. 78a**). When TFE was subsequently added at –40 °C and the mixture gradually warmed to room temperature, the reaction proceeded to form products identical to those observed under cation-free conditions (**Supplementary Fig.78b**).

Supplementary Fig 77. a) Optical spectra after adding cryptand-[2,2,2] to FeIIIL1–OO (▬, purple) showing no changes (▬, purple to red gradient). b) Optical spectra showing the reaction forming FeIIIL1 (▬, dark red) from FeIIIL1–OO– (▬, black) upon the addition of 60 µL of TFE. The Soret band at 418 nm decreased and shifted to 412 nm, while the Q-band shifted from 554 to 582 nm. These spectral shifts indicate the formation of FeIVL1=O with TFE, following a trend consistent with the reference data and identical with Supplementary Fig 76.

Supplementary Fig 78. a) Optical spectra after adding KOTf to FeIIIL1–OO– (▬, green) showing no changes (▬, green to red gradient). b) After adding of TFE to FeIIIL1–OO– with K+ (▬, black), the reaction goes to FeIVL1=O (▬, dark red) as same as Supplementary Fig 76 and 77b. c) After adding Sc(OTf)3 to FeIIIL1–OO– (▬, green) showing no changes (▬, green to red gradient) as a). d) After adding of TFE to FeIIIL1–OO– with Sc3+ (▬, black), the reaction goes to FeIVL1=O (▬, dark red) as c).

## Stoichiometric UV-vis Experiments from **FeIII–OO**–: Control Exp I with **FeTF10PP–Cl**

Supplementary Scheme . The reaction equation was conducted to analyze the %H2O2 selectivity of the stoichiometric oxygen reduction reaction via UV–vis spectroscopy for FeTF10PP–Cl.

In this section, experiments were conducted using a control ligand system (**TF10PP)** that lacks the diaza-crown-ether moiety while maintaining electronic properties similar to **L1**. This approach was designed to distinguish between effects arising from direct Lewis acid coordination versus electrostatic field effects. All experimental procedures followed protocols identical to those described in Section **4.1**, with **FeTF10PP–Cl** serving as the starting material.

The reaction sequence was performed as follows: In an N2-filled glove box, a 4-mL air-tight UV-vis cuvette was charged with 3.0 mL of **FeTF10PP–Cl** solution (20 µM, 60 nmol, 1.0 equiv) and sealed with an air-tight rubber septum. The cuvette was transferred from the glove box to a UNISOKU temperature-controlled chamber maintained at –80 °C. After temperature equilibrium, 50 µL of KO2 solution (3.0 mM in DMF, 0.15 µmol, 2.0 equiv), prepared in an N2-filled glove box, was introduced into the reaction mixture via an N2-purged syringe.

Complete conversion to **FeIIITF10PP–OO** was observed after 15 min (**Supplementary Fig 79. a**). Subsequently, 60 µL of Fc* solution (7.0 mM in CH2Cl2, 0.42 µmol, 7.0 equiv) was added to the **FeIIITF10PP–OO** complex, generating **FeIIITF10PP–OO**– at –40 °C (**Supplementary Fig 79. b**). Upon addition of 60 µL of trifluoroethanol (TFE) (1.0 M, 60 µmol, 100 equiv) at –40 °C, the spectroscopic features characteristic of **FeIIITF10PP–OO**– rapidly disappeared. As the temperature was gradually increased to 25 °C, the reaction proceeded through an **FeIVTF10PP=O** intermediate species before ultimately converting to **FeIIITF10PP+** (**Supplementary Fig. 80**).

Supplementary Fig 79. a) Optical spectra of the reaction forming FeIIITF10PP–OO (▬, dark red) from FeTF10PP–Cl (▬, purple, dash) after the adding of 2 equivalents of KO2. The Soret band at 416 nm increased, while the Q-band shifted from 508 to 569 nm. These spectral shifts indicate the formation of the side-on peroxo complex, FeIIITF10PP–OO, following a trend consistent with the reference data. b) Optical spectra of the reaction forming FeIIITF10PP–OO– (▬, dark red) from the side-on peroxo complex, FeIIITF10PP–OO (▬, purple), after the adding of 7 equivalents of Fc*. The reaction time course is represented by a rainbow gradient. The Soret band exhibits a red shift from 416 to 420 nm, while the Q-band also shifted from 569 nm to 528 nm. These changes supporting the formation of FeIIITF10PP–OO–.

Supplementary Fig 80. Optical spectra showing the reaction forming FeIIITF10PP–Cl (▬, dark red) from FeIIITF10PP–OO– (▬, black, dash) upon the addition of 60 µL of TFE. The Soret band at 416 nm decreased and shifted to 414 nm, while the Q-band shifted from 528 to 588 nm. These spectral shifts indicate the formation of FeIVTF10PP=O with TFE, following a trend consistent with the reference data.

Supplementary Scheme . The reaction was conducted to analyze the %H2O2 selectivity of the stoichiometric oxygen reduction reaction via UV–vis spectroscopy for FeTF10PP–Cl with cryptand-[2,2,2] and triflate salts (KOTf, and Sc(OTf)3) to investigate the induced cation effect.

The experiments were carried out under the same conditions as depicted in **Supplementary Scheme 25** as in **Section 4.1**. Based on these observations, the conditions for UV–vis spectroscopic analysis of the reaction in which H2O and H2O2 are generated by adding TFE to the **FeIIITF10PP–OO** species derived from the **FeTF10PP–Cl** complex was also well established. Next, to verify the cation-induced selectivity changes observed in electrochemical ORR under UV-vis spectroscopic analysis conditions, new conditions were optimized that allows introduction of cations. Under cation-free conditions, **FeIIITF10PP–OO**was formed, then a 50 µL solution of cryptand-[2,2,2] (3.0 mM in CH2Cl2, 0.12 µmol, 2.0 equiv) were added at –40 °C. As a result, the **FeIIITF10PP–OO**– in **Supplementary Scheme 25** remained stable at –40 °C for over an hour (**Supplementary Fig 81. a**). Under these conditions, when TFE was added at –40 °C, the decomposition reaction of **FeIIIL1–OO**–was observed as **Supplementary Fig 80** (**Supplementary Fig 81. b**). Meanwhile, for the cation-introducing conditions, a 50 µL solution of the triflate salts (KOTf, and Sc(OTf)3) (7.5 mM in DMF, 0.30 μmol, 5.0 equiv) was added at –80 °C to **FeIIITF10PP–OO**– in the presence of cryptand-[2,2,2]. In this condition, **FeIIITF10PP–OO**– also remained stable (**Supplementary Fig 82. a** and **c**). Subsequently, as shown previously in **Supplementary Fig 81**, TFE was added at –40 °C and the mixture was warmed to room temperature to allow the reaction to proceed, resulting in the formation of the same product as in the cation-free condition (**Supplementary Fig 82. b and d**).

Supplementary Fig 81. a) Optical spectra after adding of cryptand-[2,2,2] to FeIIITF10PP–OO (▬, purple) showing no changes (▬, purple to red gradient). b) Optical spectra showing the reaction forming FeIIITF10PP–OOH (▬, dark red) from FeIIITF10PP–OO– (▬, black) after adding of 60 µL of TFE. The Soret band at 420 nm decreased and shifted to 414 nm, while the Q-band shifted from 528 to 582 nm. These spectral shifts indicate the formation of FeIVTF10PP=O with TFE, following a trend consistent with the reference data and identical with Supplementary Fig 80.

Supplementary Fig 82. a) Optical spectra after adding KOTf to FeIIITF10PP–OO– (▬, green) showing no changes (▬, green to red gradient). b) After adding of TFE to FeIIITF10PP–OO– with K+ (▬, black), the reaction goes to FeIVTF10PP=O (▬, dark red) as same as Supplementary Fig 84 and 77b. c) After adding Sc(OTf)3 to FeIIITF10PP–OO– (▬, green) showing no changes (▬, green to red gradient) as a). d) After adding of TFE to FeIIITF10PP–OO– with Sc3+ (▬, black), the reaction goes to FeIVTF10PP=O (▬, dark red) as c).

## Quantification of H2O2 Production during Oxygen Reduction Reactions via Iodometric Titrations

H2O2 yields during oxygen reduction reactions (Sections **4.1.** to **4.2.**) were determined using spectrophotometric detection. The post-catalytic mixtures in N,N-dimethylformamide (DMF) were titrated into an iodide-containing aqueous solution, and the formation of triiodide (I3-) was monitored at 351 nm, following the reaction shown in **Supplementary Scheme 26**.

Supplementary Scheme . Quantification of H2O2 via the stoichiometric production of I3- by the iodometric titration as this reaction equation.

For the titration analysis, an aqueous iodide solution was prepared by dissolving 44 mg of KI in 2 mL of a 0.5 mM (NH4)2Mo7O24 catalyst solution in 0.5 N sulfuric acid. The titrations were performed at 25 °C in the same cuvette used for previous UV-vis experiments, equipped with a magnetic stir bar under an N2 atmosphere. All solutions were prepared under strictly anaerobic conditions to prevent auto-oxidation. Method validation was first performed using standard solutions with known H2O2 content. Based on the standard calibration curve at 351 nm, the molar extinction coefficient (ε) of I3– was determined to be 24,805.2 L mol–1 cm–1 (**Supplementary Fig 83**). Subsequently, aliquots from the reactions conducted in **Sections 4.1 to 4.2** were titrated with the iodide solution. The H2O2 yield was calculated by comparing the titration results with the amount of Fc*+ formed due to the auto-oxidation of Fc*, according to:

%H2O2 = (2 x moles of H2O2)/(moles of Fc*).

Using this analytical approach, the H2O2 selectivity for each reaction system described in **Sections 4.1** and **4.2** was determined (**Supplementary Fig. 83**).

Supplementary Fig 83. a) Calculated I3– extinction coefficient by iodometric titration with standard H2O2 solution and the example of iodometric titration from Supplementary Fig 77 a. b) An aliquot taken from the reaction sample showed that the I3⁻ absorbance band appeared at a red-shifted to 415 nm in compared to that in the standard solution.

Supplementary Fig 84. Final selectivity for %H2O2 calculated results of FeL1–Cl after iodometric titration in the presence of cation and non-cation conditions. In each bar graph, from left to right, the bars correspond to: only cryptand-[2,2,2] (▬, gray), addition of KOTf(▬, red), and Sc(OTf)3(▬, green).

Supplementary Fig 85. Final %H2O2 calculated results of FeTF10PP–Cl after iodometric titration in the presence of cation and non-cation conditions. In each bar graph, from left to right, the bars correspond to: only cryptand-[2,2,2] (▬, gray), addition of KOTf(▬, red), and Sc(OTf)3(▬, green).

Supplementary Fig 86. A comparison of the selectivity for %H2O2 generated in reactions using FeL1–Cl and FeTF10PP–Cl under both cation and non-cation conditions is presented. In each bar graph, from left to right, the bars correspond to: only cryptand-[2,2,2] (▬, gray), addition of KOTf(▬, red), and Sc(OTf)3(▬, green).

# X-ray Absorption Spectroscopy Analysis of FeL1–Cl and FeIIIL1–OO Complexes : Comparative Study of Sc(OTf)3 Effects

In an N2-filled glove box, a solution of **FeL1**–**Cl** (20 mM in anhydrous DMF) was prepared for X-ray absorption near edge structure (XANES) analysis. The sample was maintained at –40 °C throughout data collection to ensure structural integrity. As illustrated in **Supplementary Fig 77**, an excess of KO2 (10 equiv) was added *in-situ* to generate the **FeIIIL1**–**OO** species, enabling direct XANES characterization of this key intermediate. To investigate the influence of cations, 5 equivalents of Sc(OTf)3 were similarly introduced *in-situ* to both **FeL1**–**Cl** and **FeIIIL1**–**OO** under identical temperature conditions. The resulting XANES spectra were collected and analyzed, with the comparative spectroscopic data presented below.

## Comparison of the XANES Data for **FeL1**–**Cl** Before and After the Addition of Sc(OTf)3

Supplementary Fig 87. Full Fe K-edge XANES spectrum of a 20 mM FeL1–Cl solution in *N,N*-Dimethylformamide (DMF) (▬, black).

Supplementary Fig 88. Full Fe K-edge XANES spectrum of a 20 mM FeL1–Cl solution in *N*,*N*-Dimethylformamide (DMF) after the addition of 5 equivalents of Sc(OTf)3 (▬, green).

## Comparison of the XANES data for **FeIIIL1–OO** Before and After the Addition of Sc(OTf)3

Supplementary Fig 89. Full Fe K-edge XANES spectrum of the FeIIIL1–OO species formed by adding 10 equivalents of KO2 to a 20 mM FeL1–Cl solution in DMF (▬, black).

Supplementary Fig 90. Full Fe K-edge XANES spectrum of the FeIIIL1–OO species formed by adding 10 equivalents of KO2 to a 20 mM FeL1–Cl solution DMF in after the addition of 5 equivalents of Sc(OTf)3 (▬, green).

# Cleavage of FeIIIL1–OOH by the Addition of a Chemical Reductant

To compare the potential of the **FeIIIL1–OOH** to **FeIVL1=O** electron transfer step under the influence of cation addition, experiments were conducted to identify a suitable reductant capable of cleaving **FeIIIL1–OOH**, and the reaction progress was analyzed using UV-vis spectroscopy.

In an N2-filled glove box, a solution of **FeL1–Cl** (20μM in CH2​Cl2 containing 1% (*v*/*v*) DMF) was prepared for UV-vis measurements. A 4 mL air-tight UV-vis cuvette was charged with 3.0 mL of **FeL1–Cl** solution (20 μM, 80 nmol, 1.0 equiv) and sealed with an air-tight rubber septum. Following the procedure described in **Section 4**, the **FeIIIL1–OO**​ species was generated, and the cuvette was maintained at –40 °C while bubbling N2​ to remove any excess O2​. As confirmed in **Supplementary Fig 74. a**, the **FeIIIL1–OO**​ species remained intact under these conditions. Subsequently, methanol (50 μL, 1.6 μmol, 20 equiv) was added as a proton source at –80 °C, resulting in the the **FeIIIL1–OOH**​ species within 15 minutes, which remained stable for 30 minutes (**Supplementary Fig. 74c**). Finally, reductant (Fc* or cobaltocene (CoCp2), 50 μL of 6.0 mM in CH2Cl2​, 0.40 μmol, 5.0 equiv) were added at –80 °C and the resulting reactivity was examined.

## UV-vis Spectral Analysis of **FeIIIL1–OOH** to **FeIVL1=O** Cleavage Reaction without Cation

Supplementary Fig 91. Optical spectra and the Q-band region (inset) showing the reaction between 5 equivalents of Fc* and a 20 µM [FeIIIL1–OOH] solution at –80 °C. Initial spectrum of [FeIIIL1–OOH] in CH2Cl2 (▬, black). The final spectrum after 5 equivalents of Fc* to the [FeIIIL1–OOH] solution (▬, red) is identical to the initial spectrum, indicating that no electron transfer reaction occurs. Gray traces (▬, gray) show the time course of the reaction between FeIIIL1–OOH and Fc*.

Supplementary Fig 92. Optical spectra and the Q-band region (inset) showing the reaction between 5 equivalents of a CoCp2 and a 20 µM [FeIIIL1–OOH] solution at –80 °C. Initial spectrum of [FeIIIL1–OOH] in CH2Cl2 (▬, black). The final spectrum after addition of 5 equivalents of CoCp2 to the [FeIIIL1–OOH] solution (▬, red). Gray traces (▬, gray) show the time course of the reaction between [FeIIIL1–OOH] and CoCp2.

## UV-vis Spectral Analysis of **FeIIIL1–OOH** to **FeIVL1=O** Cleavage Reaction with Sc(OTf)3

Supplementary Fig 93. Optical spectra and the Q-band region (inset) showing the reaction between 5 equivalents of a Fc* and a 20 µM [FeIIIL1–OOH] solution in the presence of 5 equivalents of Sc(OTf)3 solution at –80 °C. Initial spectrum of [FeIIIL1–OOH] with 5 equivalents of Sc(OTf)3 in CH2Cl2 containing 1% (v/v) DMF (▬, black). The final spectrum after addition of 5 equivalents of Fc* to the [FeIIIL1–OOH] solution (▬, red) is identical to the results of Supplementary Fig 92, indicating the electron transfer reaction occurred. Gray traces (▬) show the time course of the reaction between [FeIIIL1–OOH] and Fc*.

Supplementary Fig 94. The overlaid spectra comparing the reaction outcomes of FeIIIL1–OOH with CoCp2 in the absence of Sc3+ (▬, black) and the reaction with FeCp*2 in the presence of Sc3+ (▬, red). The identical spectral profiles, demonstrate that the addition of Sc3+ enables FeIIIL1–OOH to react with Fc*, a weaker reductant than CoCp2.

# RDE&RRDE Set-up

## Materials and Preparation of Electrochemistry Set-up

TBAPF6, ferrocene, dichloromethane (CH2Cl2) (1 L SureSeal® Bottle), *N,N*-dimethylformamide (DMF) (1 L SureSeal® Bottle), trifluoroethanol (TFE), potassium triflate (KOTf), calcium triflate (Ca(OTf)2), and scandium triflate (Sc(OTf)3) were purchased from Sigma Aldrich. Prior to use, TBAPF6 was recrystallized twice from ethanol. Additional details regarding general electrochemical measurements are described in the Methods section of the main text.

Supplementary Fig 95. Experimental setup for electrochemical measurements: (left) Customized rotating disk electrode (RDE) cell; (right) Customized rotating ring-disk electrode (RRDE) cell.

# RDE (Rotating Disk Electrode) Measurement

## Standard Condition for O2 Reduction at Various rpm with **FeL1–Cl**

Linear sweep voltammetry data were collected under the same solution condition described below at 0.05 V/s scan rates. Solutions were prepared in CH2Cl2 (include 1% DMF) with 3 mM TFE, 0.1 M TBAPF6 and 5 equivalents of the following metal triflate salt (Mn+ = K+, Ca2+, Sc3+) Voltammograms were internally referenced to ferrocene, which was added at the end of each experiment to avoid interference with the foot-of-the-wave analysis.

Supplementary Fig 96. Linear sweep voltammograms (LSVs) of FeL1–Cl under 1 atm O2, measured at rotation rates of 400, 900, 1600, and 2500 rpm in the absence of triflate salt Data are presented using a color gradient from light to dark corresponding to increasing rotation speed from 400 to 2500 rpm.

Supplementary Fig 97. Linear sweep voltammograms (LSVs) of FeL1–Cl under 1 atm O2, measured at rotation rates of 400, 900, 1600, and 2500 rpm in the presence of KOTf. Data are present using a color gradient from light to dark corresponding to increasing rotation speed from 400 to 2500 rpm

Supplementary Fig 98. Linear sweep voltammograms (LSVs) of FeL1–Cl under 1 atm O2, measured at rotation rates of 400, 900, 1600, and 2500 rpm in the presence of Ca(OTf)2. Data are present using a color gradient from light to dark corresponding to increasing rotation speed from 400 to 2500 rpm.

Supplementary Fig 99. Linear sweep voltammograms (LSVs) of FeL1–Cl under 1 atm O2, measured at rotation rates of 400, 900, 1600, and 2500 rpm in the presence of Sc(OTf)3. Data are present using a color gradient from light to dark corresponding to increasing rotation speed from 400 to 2500 rpm.

## O2 Reduction with Control Ligand **FeTF10PP–Cl**

Linear sweep voltammetry data were collected under the same solution condition described below at 0.05 V/s scan rates. Solutions were prepared in CH2Cl2 (include 1% DMF) with 3 mM TFE, 0.1 M TBAPF6 and 5 equivalents Sc(OTf)3. Voltammograms were internally referenced to ferrocene, which was added at the end of each experiment to avoid interference with the foot-of-the-wave analysis

Supplementary Fig 100. Linear sweep voltammograms (LSVs) of FeTF10PP–Cl under 1 atm O2, measured under identical conditions, showing similar electrochemical responses in the presence of 5 equivalents of Sc(OTf)3 (▬, green solid line) and absence of Sc(OTf)3 (▬, black solid line).

# RRDE (Rotating Ring Disk Electrode) Measurement

## Collection Efficiency (*Nc*)

RRDE experiments were conducted with an Autolab potentiostat and a Pine Instruments rotator using a 5.61 mm glassy carbon disk electrode, Pt ring secondary working electrode, carbon rod counter electrode and leakless Ag/AgCl reference electrode. Solutions were analyzed in a customized cell made from a 20 mL vial (**Section 7.1**). All electrochemical cells were thoroughly rinsed with water, acetone, and CH2Cl2 and then dried in a 65 ℃ oven prior to use. The glassy carbon disk and Pt ring were polished on Buehler felt pads with mixed 0.03- 0.05 micron size alumina. Carbon rods were sonicated in water, acetone and CH2Cl2 and then dried in a 65 ℃ oven prior to use. The collection efficiency was calculated to be 36.7% using ferrocene in CH2Cl2 (containing 1% DMF) **(Supplementary Fig 101)**.

Supplementary Fig 101. RRDE traces for ferrocene dissolved in CH2Cl2 (containing 1% DMF) at 400 rpm. The disk was swept toward negative potential, while the ring was held at +0.8 V vs Ag/AgCl to re-oxidize ferrocene reduced at the disk electrode.

## Standard Conditions for O2 Reduction at Various rpm with **FeL1–Cl**

All linear sweep voltammetry data for O2 reduction were collected under identical solution conditions at 0.01 V/s scan rates. Solutions were prepared in CH2Cl2 (containing 1% DMF) with 10 mM TFE, 0.1 M TBAPF6and 5 equivalents of each triflate salt. Voltammograms were internally referenced to ferrocene, which was added at the end of each experiment. The collection efficiency was calculated to be 36.7 using ferrocene under the same solvent conditions (**Supplementary Fig 101**).

Supplementary Fig 102. Rotating ring-disk voltammograms of FeL1–Cl under 1 atm O2 in the absence of triflates salts, recorded at rotation rates of 400, 900, 1600, and 2500 rpm. Data are represented using a gradient from light to dark corresponding to increasing rotation speed from 400 to 2500 rpm.

Supplementary Fig 103. Rotating ring-disk voltammograms of FeL1–Cl under 1 atm O2 in the presence of KOTf, recorded at rotation rates of 400, 900, 1600, and 2500 rpm. Data are represented using a gradient from light to dark corresponding to increasing rotation speed from 400 to 2500 rpm.

Supplementary Fig 104. Rotating ring-disk voltammograms of FeL1–Cl under 1 atm O2 in the presence of Ca(OTf)2, recorded at rotation rates of 400, 900, 1600, and 2500 rpm. Data are represented using a gradient from light to dark corresponding to increasing rotation speed from 400 to 2500 rpm.

Supplementary Fig 105. Rotating ring-disk voltammograms of FeL1–Cl under 1 atm O2 in the presence of Sc(OTf)3, recorded at rotation rates of 400, 900, 1600, and 2500 rpm. Data are represented using a gradient from light to dark corresponding to increasing rotation speed from 400 to 2500 rpm.

## Determination of H2O2 Selectivity from RRDE Measurements with **FeL1–Cl**

The %H2O2 was calculated using equation (14), expressed as an average across all rotation rates. This calculation was based on idisk and iring currents measured between the catalytic onset and plateau potentials (approximately –0.6 to –0.8 V vs Fc+/0). We note that although this equation was originally derived for heterogeneous dioxygen reduction, it has been widely adopted for homogeneous systems.

|  | ( 14 ) |
| --- | --- |

Supplementary Fig 106. H2O2 selectivity measured with FeL1–Cl as a function of the disk potential at rotation rates of 400, 900, 1600, and 2500 rpm in the absence of triflate salts, yielding approximately 67%, 83%, 85%, and 91%, respectively. Color intensity transitions from light to dark with an increasing rotation rate from 400 to 2500 rpm.

Supplementary Fig 107. H2O2 selectivity measured with FeL1–Cl as a function of the disc potential at rotation rates of 400, 900, 1600, and 2500 rpm with 5 equivalents of KOTf, yielding approximately 75%, 84%, 89%, and 89%, respectively. Color intensity transitions from light to dark with an increasing rotation rate 400 to 2500 rpm.

Supplementary Fig 108. H2O2 selectivity measured with FeL1–Cl as a function of the disc potential at rotation rates of 400, 900, 1600, and 2500 rpm with 5 equivalents of Ca(OTf)2, yielding approximately 62%, 73%, 79%, and 81%, respectively. Color intensity transitions from light to dark with an increasing rotation rate 400 to 2500 rpm.

Supplementary Fig 109. H2O2 selectivity measured with FeL1–Cl as a function of the disc potential at rotation rates of 400, 900, 1600, and 2500 rpm with 5 equivalents of Sc(OTf)3, yielding approximately 32%, 41%, 53%, and 60%, respectively. Color intensity transitions from light to dark with an increasing rotation rate 400 to 2500 rpm.

## Determination of H2O2 Selectivity from RRDE Measurements with **Fe**-incorporated Derivatives of the Control Ligands

The %H2O2 was calculated using equation (14), expressed as an average across all rotation rates. This calculation was based on idisk and iring currents measured between the catalytic onset and plateau potentials (approximately 0.2 to 0.3 V vs Ag/AgCl). We note that although this equation was originally derived for heterogeneous dioxygen reduction, it has been widely adopted for homogeneous systems.

Supplementary Fig 110. H2O2 selectivity measured with FeTPP–Cl as a function of the disc potential at 1600 rpm in the absence of added cations. Data are from three independent experiments; the average selectivity is 79%.

Supplementary Fig 111. H2O2 selectivity measured with FeTPP–Cl as a function of the disc potential at 1600 rpm with KOTf. Data are from three independent experiments; the average selectivity is 77%.

Supplementary Fig 112. H2O2 selectivity measured with FeTPP–Cl as a function of the disc potential at 1600 rpm with Ca(OTf)2. Data are from three independent experiments; the average selectivity is 84%.

Supplementary Fig 113. H2O2 selectivity measured with FeTPP–Cl as a function of the disc potential at 1600 rpm with Sc(OTf)3. Data are from three independent experiments; the average selectivity is 79%.

Supplementary Fig 114. H2O2 selectivity measured with FeTF10PP–Cl as a function of the disc potential at 1600 rpm in the absence of added cations. Data are from three independent experiments; the average selectivity is 83%.

Supplementary Fig 115. H2O2 selectivity measured with FeTF10PP–Cl as a function of the disc potential at 1600 rpm with KOTf. Data are from three independent experiments; the average selectivity is 85%.

Supplementary Fig 116. H2O2 selectivity measured with FeTF10PP–Cl as a function of the disc potential at 1600 rpm with Ca(OTf)2. Data are from three independent experiments; the average selectivity is 84%.

Supplementary Fig 117. H2O2 selectivity measured with FeTF10PP–Cl as a function of the disc potential at 1600 rpm with Sc(OTf)3. Data are from three independent experiments; the average selectivity is 79%.

Supplementary Fig 118. H2O2 selectivity measured with FeTF20PP–Cl as a function of the disc potential at 1600 rpm with Sc(OTf)3. Data are from three independent experiments; the average selectivity is 86%.

Supplementary Fig 119. H2O2 selectivity measured with FeTF20PP–Cl as a function of the disc potential at 1600 rpm with KOTf. Data are from three independent experiments; the average selectivity is 94%.

Supplementary Fig 120. H2O2 selectivity measured with FeTF20PP–Cl as a function of the disc potential at 1600 rpm with Ca(OTf)2. Data are from three independent experiments; the average selectivity is 93%.

Supplementary Fig 121. H2O2 selectivity measured with FeTF20PP–Cl as a function of the disc potential at 1600 rpm with Sc(OTf)3. Data are from three independent experiments; the average selectivity is 88%.

## Tafel Analysis from Current

RRDE data collected under standard conditions described in **Section 9.2** at rotation speeds of 400, 900, 1600, and 2500 rpm. Using this current value, a Tafel plot was constructed and the Tafel slope was determined from the linear region at potentials near the catalytic onset (commonly referred to as the “foot region”).

Supplementary Fig 122. Tafel plots derived from the current at rotation rates of 400, 900, 1600, and 2500 rpm in the absence of triflate salts, yielding Tafel slopes of approximately 112, 117, 118, and 111 mV/dec, respectively. Color intensity transitions from light to dark with an increasing rotation rate from 400 to 2500 rpm.

Supplementary Fig 123. Tafel plots derived from the current at rotation rates of 400, 900, 1600, and 2500 rpm in the absence of triflate salts, yielding Tafel slopes of approximately 115, 109, 107, and 104 mV/dec, respectively. Color intensity transitions from light to dark with an increasing rotation rate from 400 to 2500 rpm.

Supplementary Fig 124. Tafel plots derived from the current at rotation rates of 400, 900, 1600, and 2500 rpm in the absence of triflate salts, yielding Tafel slopes of approximately 109, 105, 105, and 104 mV/dec, respectively. Color intensity transitions from light to dark with an increasing rotation rate from 400 to 2500 rpm.

Supplementary Fig 125. Tafel plots derived from the current at rotation rates of 400, 900, 1600, and 2500 rpm with 5 equivalents of KOTf, yielding Tafel slopes of approximately 119, 114, 110, and 110 mV/dec, respectively. Color intensity transitions from light to dark with an increasing rotation rate from 400 to 2500 rpm.

Supplementary Fig 126. Tafel plots derived from the current at rotation rates of 400, 900, 1600, and 2500 rpm with 5 equivalents of KOTf, yielding Tafel slopes of approximately 123, 119, 114, and 105 mV/dec, respectively. Color intensity transitions from light to dark with an increasing rotation rate from 400 to 2500 rpm.

Supplementary Fig 127. Tafel plots derived from the current at rotation rates of 400, 900, 1600, and 2500 rpm with 5 equivalents of KOTf, yielding Tafel slopes of approximately 109, 109, 107, and 108 mV/dec, respectively. Color intensity transitions from light to dark with an increasing rotation rate from 400 to 2500 rpm.

Supplementary Fig 128. Tafel plots derived from the current at rotation rates of 400, 900, 1600, and 2500 rpm with 5 equivalents of Ca(OTf)2, yielding Tafel slopes of approximately 137, 130, 126, and 111 mV/dec, respectively. Color intensity transitions from light to dark with an increasing rotation rate from 400 to 2500 rpm.

Supplementary Fig 129. Tafel plots derived from the current at rotation rates of 400, 900, 1600, and 2500 rpm with 5 equivalents of Ca(OTf)2, yielding Tafel slopes of approximately 130, 129, 128, and 127 mV/dec, respectively. Color intensity transitions from light to dark with an increasing rotation rate from 400 to 2500 rpm.

Supplementary Fig 130. Tafel plots derived from the current at rotation rates of 400, 900, 1600, and 2500 rpm with 5 equivalents of Ca(OTf)2, yielding Tafel slopes of approximately 117, 114, 114, and 113 mV/dec, respectively. Color intensity transitions from light to dark with an increasing rotation rate from 400 to 2500 rpm.

Supplementary Fig 131. Tafel plots derived from the current at rotation rates of 400, 900, 1600, and 2500 rpm with 5 equivalents of Sc(OTf)3, yielding Tafel slopes of approximately 137, 133, 130, and 132 mV/dec, respectively. Color intensity transitions from light to dark with an increasing rotation rate from 400 to 2500 rpm.

Supplementary Fig 132. Tafel plots derived from the current at rotation rates of 400, 900, 1600, and 2500 rpm with 5 equivalents of Sc(OTf)3, yielding Tafel slopes of approximately 145, 129, 122, and 107 mV/dec, respectively. Color intensity transitions from light to dark with an increasing rotation rate from 400 to 2500 rpm.

Supplementary Fig 133. Tafel plots derived from the current at rotation rates of 400, 900, 1600, and 2500 rpm with 5 equivalents of Sc(OTf)3, yielding Tafel slopes of approximately 136, 115, 102, and 95 mV/dec, respectively. Color intensity transitions from light to dark with an increasing rotation rate from 400 to 2500 rpm.

Supplementary Fig 134. Bar graph comparing the averaged Tafel slopes obtained from above three independent measurements conducted under different cation conditions: absence of triflate salts, and presence of 5 equivalents of KOTf, Ca(OTf)2, and Sc(OTf)3. Error bars represent the standard error of the mean.

## Tafel Analysis from Kinetic Current

A Koutecky-Levich (K–L) plot was constructed using RRDE data collected under standard conditions described in **Section 9.2** at rotation speeds of 400, 900, 1600, and 2500 rpm. The plot was generated with ω–1/2 on the x-axis and i–1 on the y-axis. The kinetic current (iₖ) was determined from the y-intercept (1/iₖ) of the linear regression. Using this kinetic current value, a Tafel plot was constructed and the Tafel slope was determined from the linear region at potentials near the catalytic onset (commonly referred to as the “foot region”).

Supplementary Fig 135. (Top) Koutecky–Levich (K–L) plots obtained in the absence of triflate salts at rotation rates of 400, 900, 1600, and 2500 rpm. (Bottom) Tafel plot derived from the kinetic current extracted from K–L analysis, yielding a Tafel slope of 119 mV/dec. All measurements were conducted under standard conditions described in Section 9.2. Data represents the first of three independent experiments used for statistical analysis.

Supplementary Fig 136. (Top) Koutecky–Levich (K–L) plots obtained in the absence of triflate slats, at rotation rates of 400, 900, 1600, and 2500 rpm. (Bottom) Tafel plot derived from the kinetic current extracted from K–L analysis, yielding a Tafel slope of 117 mV/dec. All measurements were conducted under standard conditions described in Section 9.2. A representative plot from a triplicate experiment is shown above. Data represents the second of three independent experiments used for statistical analysis.

Supplementary Fig 137. (Top) Koutecky–Levich (K–L) plots obtained in the absence of triflate salts, at rotation rates of 400, 900, 1600, and 2500 rpm. (Bottom) Tafel plot derived from the kinetic current extracted from K–L analysis, yielding a Tafel slope of 109 mV/dec. All measurements were conducted under standard conditions described in Section 9.2. Data represents the third of three independent experiments used for statistical analysis.

Supplementary Fig 138. (Top) Koutecky–Levich (K–L) plots obtained in the presence of 5 equivalents of KOTf, at rotation rates of 400, 900, 1600, and 2500 rpm. (Bottom) Tafel plot derived from the kinetic current extracted from K–L analysis, yielding a Tafel slope of 119 mV/dec. All measurements were conducted under standard conditions described in Section 9.2. Data represents the first of three independent experiments used for statistical analysis.

Supplementary Fig 139. (Top) Koutecky–Levich (K–L) plots obtained in the presence of 5 equivalents of KOTf, at rotation rates of 400, 900, 1600, and 2500 rpm. (Bottom) Tafel plot derived from the kinetic current extracted from K–L analysis, yielding a Tafel slope of 108 mV/dec. All measurements were conducted under standard conditions described in Section 9.2. Data represents the second of three independent experiments used for statistical analysis.

Supplementary Fig 140. (Top) Koutecky–Levich (K–L) plots obtained in the presence of 5 equivalents of KOTf, at rotation rates of 400, 900, 1600, and 2500 rpm. (Bottom) Tafel plot derived from the kinetic current extracted from K–L analysis, yielding a Tafel slope of 119 mV/dec. All measurements were conducted under standard conditions described in Section 9.2. Data represents the third of three independent experiments used for statistical analysis.

Supplementary Fig 141. (Top) Koutecky–Levich (K–L) plots obtained in the presence of 5 equivalents of Ca(OTf)2, at rotation rates of 400, 900, 1600, and 2500 rpm. (Bottom) Tafel plot derived from the kinetic current extracted from K–L analysis, yielding a Tafel slope of 131 mV/dec. All measurements were conducted under standard conditions described in Section 9.2. Data represents the first of first independent experiments used for statistical analysis.

Supplementary Fig 142. (Top) Koutecky–Levich (K–L) plots obtained in the presence of 5 equivalents of Ca(OTf)2, at rotation rates of 400, 900, 1600, and 2500 rpm. (Bottom) Tafel plot derived from the kinetic current extracted from K–L analysis, yielding a Tafel slope of 123 mV/dec. All measurements were conducted under standard conditions described in Section 9.2. Data represents the first of second independent experiments used for statistical analysis.

Supplementary Fig 143. (Top) Koutecky–Levich (K–L) plots obtained in the presence of 5 equivalents of Ca(OTf)2, at rotation rates of 400, 900, 1600, and 2500 rpm. (Bottom) Tafel plot derived from the kinetic current extracted from K–L analysis, yielding a Tafel slope of 141 mV/dec. All measurements were conducted under standard conditions described in Section 9.2. Data represents the first of third independent experiments used for statistical analysis.

Supplementary Fig 144. (Top) Koutecky–Levich (K–L) plots obtained in the presence of 5 equivalents of Sc(OTf)3, at rotation rates of 400, 900, 1600, and 2500 rpm. (Bottom) Tafel plot derived from the kinetic current extracted from K–L analysis, yielding a Tafel slope of 121 mV/dec. All measurements were conducted under standard conditions described in Section 9.2. Data represents the first of first independent experiments used for statistical analysis.

Supplementary Fig 145. (Top) Koutecky–Levich (K–L) plots obtained in the presence of 5 equivalents of Sc(OTf)3, at rotation rates of 400, 900, 1600, and 2500 rpm. (Bottom) Tafel plot derived from the kinetic current extracted from K–L analysis, yielding a Tafel slope of 119 mV/dec. All measurements were conducted under standard conditions described in Section 9.2. Data represents the second of first independent experiments used for statistical analysis.

_s

Supplementary Fig 146. (Top) Koutecky–Levich (K–L) plots obtained in the presence of 5 equivalents of Sc(OTf)3, at rotation rates of 400, 900, 1600, and 2500 rpm. (Bottom) Tafel plot derived from the kinetic current extracted from K–L analysis, yielding a Tafel slope of 123 mV/dec. All measurements were conducted under standard conditions described in Section 9.2. Data represents the third of first independent experiments used for statistical analysis.

## Solvent-Dependent Correlations Between **FeII/III** Redox Potentials and H2O2 Selectivity

All linear sweep voltammetry data for O2 reduction were collected at a scan rate of 0.01 V/s under identical solution conditions. Solutions were prepared in three solvents—CH2Cl2 (containing 1% DMF, as shown in the **Supplementary Fig 135**.), DMF, and DMSO—by adding 0.3 mM Fe catalyst, 10 mM TFE or 10 mM *p*-toluenesulfonic acid (pTsOH), 0.1 M TBAPF₆, and 5 equivalents of each triflate salt. Voltammograms were internally referenced to Fc, which was added at the end of each experiment.

Supplementary Fig 147. Linear correlations between FeII/III redox potentials and H2O2 selectivity for FeT*p*OMePP (■, black square), FeTPP (▲, black upward triangle), FeTF10PP (▼, black downward triangle), and FeTF20PP (◆, black diamond) measured under standard RRDE conditions. (Top) In DMSO (···, dotted line), H2O2 selectivity values were 31%, 49%, and 99% from left to right. (Middle) In DMF (---, dashed line), H2O2 selectivity increased to 85%, 91%, 99%, and 99%. (Bottom) In CH2Cl2 containing 1% DMF (▬, solid line), H2O2 selectivity values were 22%, 32%, and 62%. Data points were excluded when complexes exhibited no measurable ORR activity in the corresponding solvent. Across all solvents, a positive correlation was observed, with anodic shifts in FeII/III redox potentials consistently associated with increased H2O2 selectivity.

Table S8.

|  | FeII/III redox potential / V vs. Fc+/0 (ΔRedox potential vs. previous / mV) | | |
| --- | --- | --- | --- |
| Complex | **DMSO** | **DMF** | **CH2Cl2** |
| FeT*p*OMePP | –0.560 | - | - |
| FeTPP | –0.535 (25) | –0.627 (42) | –0.723 |
| FeTF10PP | –0.467 (68) | –0.531 (96) | –0.676 (47) |
| FeTF20PP | - | –0.496 (35) | –0.617 (59) |

Supplementary Fig 148. Linear correlations between FeII/III redox potentials and H2O2 selectivity for FeL1–Cl under various conditions: absence of added cations (●, black sphere), and presence of 5 equivalents of KOTf (●, red sphere), Ca(OTf)2 (●, blue sphere), and Sc(OTf)3 (●, green sphere). (Top) In DMSO (···, dotted line), all conditions yielded nearly exclusive H2O2 formation. (Middle) In DMF (---, dashed line), H2O2 selectivity decreased to 94%, 93%, 92%, and 89% from left to right. (Bottom) In CH2Cl2 containing 1% DMF (▬, solid line), H2O2 selectivity values were 88%, 86%, 76%, and 48%. Across all solvents, a negative correlation was observed, with cathodic shifts in FeII/III redox potentials consistently associated with decreased H2O2 selectivity.

Table S9.

|  | FeII/III redox potential / V vs. Fc+/0 (ΔRedox potential vs. FeL1–Cl / mV) | | |
| --- | --- | --- | --- |
| Complex | **DMSO** | **DMF** | **CH2Cl2** |
| FeL1–Cl | –0.372 | 0.516 | 0.450 |
| FeL1–Cl _K+ | –0.383 (11) | 0.511 (5) | 0.450 (0) |
| FeL1–Cl _Ca2+ | –0.382 (10) | 0.518 (2) | 0.360 (90) |
| FeL1–Cl _Sc3+ | –0.362 (10) | 0.402 (114) | 0.330 (120) |

# Mechanistic Study

## Electrochemical UV–vis Spectroscopy

Spectroelectrochemical experiments were conducted using a custom-designed spectroelectrochemical cell equipped with a quartz window. The measurements were performed at room temperature under an atmospheric pressure of O2 to monitor the reaction between **FeL1–Cl** and O2 in real time. A three-electrode system was employed, comprising a honeycomb working electrode (Pine Ins.) and an Ag/AgCl reference electrode (3 M NaCl). The electrolyte solution contained 0.1 M TBAPF₆ in CH2Cl2 containing 1% DMF, which was deoxygenated by purging with argon before introducing O2. The electrochemical potential was controlled using a potentiostat (WaveNowXV Potentiostat Bundle, FC International), and UV–vis spectra were recorded simultaneously using a UV–vis spectrophotometer (Avantes spectrometer, FC International). Spectra were collected at—1000mV applied potentials to monitor the formation of the **FeIIIL1–OO** species.

Supplementary Fig 149. Comparison between the UV–vis spectrum of chemically synthesized FeIIIL1–OO species (▬, black solid line), referenced in Supplementary Fig 91 in Section 6.1, and the *in situ* spectroelectrochemical spectrum obtained during the reaction of FeL1–Cl with O2 at room temperature (▬, red solid line). Both spectra exhibit matching profiles with the chemically generated species showing a Soret band at 421 nm and Q-band at 561 nm (▬, black solid line), while the electrochemically generated species displays a Soret band at 420 nm and Q-band at 565 nm (▬, red solid line).

For comparison, a UV-vis spectrum was recorded under chronoamperometric conditions at –1000 mV in the absence of a proton source. The spectral profiles and λmax values of this spectrum and the chemically synthesized **FeIIIL1–OO** species were found to be in close agreement, confirming the formation of an identical species under electrochemical conditions. Upon subsequent addition of the proton source TFE, the **FeIIIL1–OO** species rapidly transformed to un unidentified species.

Supplementary Fig 150. *In situ* UV-vis spectra were recorded during the electrochemical reaction between compound FeL1–Cl and O2 at 25 °C (▬, red solid line). Upon addition of the proton source TFE, the FeIIIL1–OO species rapidly transformed into a different species (▬, blue solid line).

## Derivations for the Diagnostic Criteria Presented in **Table S10**.

**Table S10. Diagnostic Criteria of Proposed Paths for O2 Reduction1**

|  | Rate-limiting step of proposed mechanism | Expected tafel slope calculated at 298K | Expected [H+] reaction order | Expected O2 reaction order |
| --- | --- | --- | --- | --- |
| A.1 |  | 59/β | 0 | 1 |
| A.2 |  | 59 | 1 | 1 |
| B.1 |  | ∞ | 0 | 1 |
| **B.2** |  | **59/β** | **1** | **1** |
| C.1 |  | ∞ | 0 | 1 |
| C.2 |  | 59/β | 0 | 1 |
| C.3 |  | 59 | 1 | 1 |

Since O2 reduction is an electrochemical reduction process, decreasing the potential to more negative values on an absolute scale led to an increased reaction rate. Therefore, to maintain consistency in the sign convention, all rate laws are expressed in terms of –E.

**Pathway A.**

If **A.1** is the rate-limiting step, applying the Butler-Volmer equation to an irreversible electron transfer leads to the following rate law for the reaction velocity (*v*):

|  |  | () |
| --- | --- | --- |
|  |  | () |

Here, β represents the transfer coefficient, while all other terms (F, E, R, and T) retain their standard meanings. If the number of vacant active sites () is high, the effect of potential changes on this value can be ignored, allowing it to be treated as a constant. Consequently, from the above equation, the Tafel slope is 2.3RT/βF, approximately 120 mV/dec, and the reaction exhibits first-order dependence on O2.

If **A.2** is the rate-limiting step, the reaction rate would follow the expression given below:

|  |  | () |
| --- | --- | --- |
|  |  | () |

If approaches 1 within the reaction, the Tafel slope becomes infinite, and the reaction follows first-order dependence on protons. However, if the initial is close to 0 and approaches 1, step **A.1** can be formulated as a pre-equilibrium step based on the Nernst equation:

|  |  | () |
| --- | --- | --- |

By combining this expression with the rate law for step **A.2** derived above, we obtain the following expression:

|  |  | (20) |
| --- | --- | --- |

Therefore, the Tafel slope is approximately 60 mV/dec, and the reaction exhibits first-order dependence on both O2 and protons.

**Pathway B.**

If the elementary step **B.1** were rate-limiting, the rate law would be as follows:

|  |  | (21) |
| --- | --- | --- |
|  |  | (22) |

One would expect an infinite Tafel slope since this equation does not contain a potential-dependent term, and it exhibits first-order dependence on O2.

If **B.2** is the rate-limiting step, the reaction rate would follow the expression given below:

|  |  | (23) |
| --- | --- | --- |
|  |  | (24) |

If step **B.1** is assumed to be in quasi-equilibrium, the following relationship can be applied:

|  |  | (25) |
| --- | --- | --- |

By substituting this back into the previously derived rate equation, we obtain the following result:

|  |  | (26) |
| --- | --- | --- |

This would yield a Tafel slope of 2.3RT/βF, approximately 120 mV/dec, along with first-order dependence on protons and first-order dependence on O2.

**Pathway C**.

If the elementary step **C.1** were rate-limiting, the rate law would be as follows:

|  |  | (27) |
| --- | --- | --- |
|  |  | (28) |

One would expect an infinite Tafel slope since this equation does not contain a potential-dependent term, and it exhibits first-order dependence on O2.

If **C.2** is the rate-limiting step, applying the Butler-Volmer equation to an irreversible electron transfer leads to the following rate law for the reaction velocity (*v*):

|  |  | (29) |
| --- | --- | --- |
|  |  | (30) |

If step **C.1** is assumed to be in quasi-equilibrium, the following relationship can be applied:

|  |  | (31) |
| --- | --- | --- |

By substituting this back into the previously derived rate equation, we obtain the following result:

|  |  | (32) |
| --- | --- | --- |

This would yield a Tafel slope of 2.3RT/βF, approximately 120 mV/dec, along with first-order dependence on O2.

Finally, if step **C.3** is the rate-determining step, the reaction rate follows the equation below:

|  |  | (33) |
| --- | --- | --- |
|  |  | (34) |

If ​ approaches 1, the Tafel slope is expected to be infinite, with zero-order dependence on O2 and first-order dependence on protons. However, if approaches 0 and correspondingly approaches 1, step **C.2** can be rewritten as a pre-equilibrium step:

|  |  | (35) |
| --- | --- | --- |

Since the equilibrium expression for ​ is as follows:

|  |  | (36) |
| --- | --- | --- |

Combining the two equilibrium expressions and substituting them into the rate law yields the following equation:

|  |  | (37) |
| --- | --- | --- |
|  |  | (38) |

Using this rate law, the anticipated reaction orders are first order in O2 and protons, with a Tafel slope of approximately 60 mV/dec.

Our reaction exhibits first-order dependence on protons, follows a pre-equilibrium with O2, and has a Tafel slope of approximately 120 mV/dec. Based on the results derived under these assumptions, the reaction follows Pathway B mechanism, with the rate-limiting step (RLS) identified as the **B.2** step, corresponding to the concerted proton-electron transfer (CPET) step.

# Computational Analysis

## Stark Effect Study in IR with **ZnL1−CN** upon Oriented Electric Field Effect

IR shifts in **ZnL1−CN** and **ZnTF10PP−CN** upon binding of positively charged cations and under an oriented electric field was examined using the Gaussian 16 program package. The internal coordinate system (Z-matrix) to align the electric field with the cyanide (CN) bond axis was employed by following the computational procedure described in Hanaway et al.3 Gas-phase geometry optimization was performed using B3LYP as functional with D3(BJ) dispersion correlation and def2-SVP as basis set under the applied electric field without geometry contratints. The electric field direction matched that generated at **ZnL1−CN_K** by the potassium cation, and its strength was systematically varied from 0.000 to 0.0210 atomic units (au) as described in **Table S11**. Assuming the monovalent cation as a point charge, the electric field at the nitrile bond center was estimated using a simplified equation with charge and distance from the charge (equation (39)), yielding 0.020 au without accounting for medium permittivity.

|  |  | (39) |
| --- | --- | --- |

The applied electric field modulated both the equilibrium bond length and the C–N stretching frequency. Previous studies on the vibrational Stark effect indicate that a monovalent cation aligned with our system induces a red shift of less than 10 cm–1 in the vibrational stretch.4 While our computational results align with the direction of this shift, the magnitude was significantly larger than the reported range. This discrepancy can be attributed to three factors: 1) The computational model applied a uniform parallel electric field, whereas the field generated by a cation decay with distance (field strength variation). 2) The permittivity of the environment differs from that of a vacuum due to electron density distributed between the cation and the nitrile bond (medium permittivity). 3) The high dielectric constant of the surrounding solvent cage contributes additional electric field effects (solvent cage effects).

## DFT Analysis of the Spin State of the Fe Porphyrin Catalytic Intermediates

Table S11. Equilibrium bond length and IR stretching frequency of ZnTF10PP–CN under applied parallel electric field.

| Field / au | Zn–C / Å | C–N / Å | C–N / cm-1 |
| --- | --- | --- | --- |
| 0.0000 | 2.039 | 1.166 | 2276.04 |
| 0.0007 | 2.040 | 1.167 | 2274.69 |
| 0.0014 | 2.041 | 1.167 | 2273.25 |
| 0.0021 | 2.042 | 1.167 | 2271.81 |
| 0.0070 | 2.134 | 1.171 | 2235.18 |
| 0.0140 | 2.132 | 1.170 | 2236.14 |
| 0.0210 | 2.210 | 1.174 | 2209.07 |

We assumed that a nucleophilic solvent molecule coordinates to the Fe porphyrin system as an axial ligand, consistent with previously reported solvent-involved systems.5 Our porphyrin platform features two distinct faces: one facing the diaza-crown-ether moiety and the other opposite to it. Given the greater steric hindrance of *N*,*N*-dimethylformamide (DMF) compared to smaller molecules like O2, we positioned DMF on the side opposite to the crown ether moiety in the hexacoordinated intermediates. For scandium-bound complexes, an additional triflate anion was required to fully encapsulate the scandium ion within the crown ether moiety. This is supported by reported single-crystal structures of scandium-bound crown ether complexes, which typically exhibit a hepta- or octa-coordinated scandium center.6-9 However, our crown ether moiety provides only six Lewis-basic sites, necessitating the additional coordination of a triflate ion to achieve full encapsulation.

|  |  | (40) |
| --- | --- | --- |

The spin state of the Fe porphyrin species varies depending on the electronic properties of the coordination sphere. Intermediate or high spin species are observed for synthetic Fe porphyrin species.10 We individually optimized geometries and calculated relative free energies for three potential spin states, S = 0, 1, 2 or S = 1/2, 3/2, 5/2, depending on the number of electrons in the molecular system to investigate the most plausible spin state of the catalytic intermediates as described in **Table S12**. We used a simplified Fe porphyrin model, **FeTF10PP**, to maintain the electronic properties of the complexes to reduce computational cost associated with calculating the flexible crown-ether moiety. We calculated eight catalytic intermediates, most of which exhibited intermediate spin states as the most stable configurations.

Two exceptions were the **FeIIITF10PP−OOH** species, and the **FeIITF10PP−OOH-** species. The **FeIIITF10PP−OOH** species was most stable in the doublet (S = 1/2) spin state, consistent with literature reports.11-13 The **FeIITF10PP−OOH** species were most stable in the quintet (S = 2) spin state. Since the **FeIVTF10PP=O**, formed after the heterolysis of the O–O bond was most stable in the triplet (S = 1) spin state, we selected the triplet spin state for the **FeIITF10PP−OOH** to ensure spin conservation during the heterolysis process.

The **FeIITF10PP**, was most stable in the triplet spin state, with the quintet spin state demonstrating almost identical free energies. **FeIITF10PP** in the triplet spin state forms an unstable singlet or quintet **FeIIITF10PP−OO•**, when reacted with triplet O2, so we selected the quintet spin state for the **FeIITF10PP** species. For the **FeIVTF10PP=O•+**, though the complex is most stable in the quartet (S = 3/2) spin state, we used the doublet (S = 1/2) spin state to calculate the ORR mechanism to conserve the spin state of the **FeIIITF10PP−OOH** during the heterolysis of an H2O molecule in the presence of an extra proton. The qualitative nature of the mechanism pathway did not change even when considering the difference of approximately 10 kcal mol−1 between the two spin states.

Table S12. Relative Gibbs free energies (in kcal mol−1) of catalytic intermediates in the FeTF10PP system containing an odd number of electrons for different spin states. Values used for calculating the ORR mechanism are shown in bold.

| Species | Doublet (S = 1/2) | Quartet (S = 3/2) | Sextet (S = 5/2) |
| --- | --- | --- | --- |
| FeIIITF10PP+ | 14.4 | **0.0** | 4.3 |
| FeIIITF10PP−OOH | −**3.0** | 0.0 | −1.5 |
| FeIIITF10PP−TFEdeproton | 0.7 | **0.0** | 1.0 |
| FeIVTF10PP=O•+ | **9.6** | 0.0 | 31.1 |

Table S13. Relative Gibbs free energy (in kcal mol−1) of catalytic intermediates of FeTF10PP system with an even number of electrons with different spin states. The spin state used for calculating the ORR mechanism is highlighted in bold.

| Species | Singlet (S = 0) | Triplet (S = 1) | Quintet (S = 2) |
| --- | --- | --- | --- |
| FeIITF10PP | 13.4 | 0.0 | −**0.2** |
| FeIIITF10PP−OO• | 21.3 | **0.0** | Dissociate |
| FeIIITF10PP−OOH | −0.6 | **0.0** | −2.4 |
| FeIVTF10PPO | 31.1 | **0.0** | 8.7 |

## General DFT Analysis of the Redox Thermochemistry and the Bifurcation in the ORR Mechanism in the Fe Porphyrin Catalyst

The mechanism for the bifurcation in the ORR catalyzed by our Fe porphyrin system was computationally explored using density functional theory (DFT) following previously proposed mechanisms5 The reduction potentials of chemical species were calculated from the electron transfer process from ferrocene (Fc) to form ferrocenium ion (Fc+). The thermochemistry of the electron transfer process from the electrode was calculated. Here, we set the electrode potential to –0.4 V vs Fc+**/**0 to examine the reaction mechanism. A detailed mathematical treatment for calculation of the thermochemistry of the oxidized (O) and reduced (R) species with respect to the electronic potential of the electrode is provided below (equation (41)~(44)). We also calculated the energy of the electron required to achieve a thermoneutral reaction for proton-coupled electron transfer (PCET) processes using trifluoroethanol (TFE) as a proton donor.

|  |  | (41) |
| --- | --- | --- |
|  |  | (42) |
|  |  | (43) |
|  |  | (44) |

The selectivity of the ORR between H2O and H2O2 is known to be determined by the protonation site of the FeIII-OOH species.14,15 We attempted to optimize the structures of protonated FeIII-OOH species at both the distal and proximal oxygen sites without structural restrictions. However, during the optimization process, the proton consistently transferred to the oxygen of the crown ether moiety, preventing the desired structures from being obtained. To address this, we optimized the structures by placing trifluoroethanol (TFE) near the distal (TFEdis) or proximal (TFEprox) oxygen to form a hydrogen bond. Notably, when TFE was placed near the distal oxygen in the presence of scandium ion (Sc3+), it coordinated to the metal center, whereas no such coordination was observed with the proximal oxygen.

## DFT Analysis of the Impact of Cations on the ORR Catalytic Cycle

We investigated the influence of Sc3+ on the selectivity of the ORR to elucidate the origin of the selectivity change induced by the addition of a redox-inactive metal salt (**Section 9.**). The thermochemistry of the ORR catalytic cycle was calculated, starting from the **FeᴵᴵᴵL1−Cl** state and proceeding to the final species of the Fe porphyrin catalyst, **FeᴵᴵᴵL1-TFEdeproton**, after the release of product molecules. Without coordination of the deprotonated TFE (generated after proton transfer to the catalytic intermediate), the final step to close the catalytic cycle was highly endothermic, rendering the catalysis non-viable due to the loss of binding energy of the axial ligand. The binding energy of the deprotonated TFE to the **FeᴵᴵᴵL1** species was calculated to be −28.6 kcal/mol in the presence of Sc3+ and −29.0 kcal/mol in its absence. Notably, the proton of TFE in the **FeIIIL1–OOH + TFEdis** species transferred to the distal oxygen upon reduction with an electron in the presence of Sc3+, suggesting a multi-site proton-coupled electron transfer mechanism (**Table S14**).

Table S14. Mulliken spin density at the Fe center obtained from single point calculations and geometric parameters of the Fe-hydroperoxo species with hydrogen bonding between the distal oxygen and TFE in the optimized structures.

| Cation | Species | Odistal–H / Å | OTFE–H / Å | ρFe |
| --- | --- | --- | --- | --- |
| X | **[FeIIIL1–OOH]+TFEdis** | 1.788 | 0.983 | 0.881 |
| X | **[FeIIL1–OOH] +TFEdis** | 1.660 | 0.997 | 2.188 |
| Sc3+ | **[FeIIIL1–OOH]+TFEdis** | 1.472 | 1.036 | 0.974 |
| Sc3+ | **[FeIIL1–OOH] +TFEdis** | 1.041 | 1.445 | 2.132 |

Supplementary Fig 151. Relative Gibbs free energy diagram (in kcal mol–1) for ORR catalytic intermediates using FeIIIL1 porphyrin catalyst in the absence of Sc3+: Comparison of catalytic pathways to H2O (▬, blue) or H2O2 (▬, pink) in CH2Cl2. Elementary steps involving electron transfer processes are indicated by dotted lines, and the thermochemistry was calculated relative to a potential of –0.4 V versus the Fc+/0 reference.

Supplementary Fig 152. Relative Gibbs free energy diagram (in kcal mol–1) for ORR catalytic intermediates on Fe porphyrin catalyst in presence of Sc3+: Comparison of catalytic pathways to H2O (▬, blue) or H2O2 (▬, pink) solvated in CH2Cl2. Elementary steps involving electron transfer processes are indicated by dotted lines, and the thermochemistry was calculated relative to a potential of –0.4 V versus the Fc+/0 reference.

## DFT analysis of the Impact of Solvent on the Selectivity of the ORR Catalytic Cycle

We investigated the solvation and coordination effects of solvents—CH2Cl2, DMF, and DMSO—on the selectivity of the ORR to understand how different solvent conditions influence ORR selectivity (**Supplementary Fig 147**). Our experimental ORR studies were conducted in three solvent systems: CH2Cl2 with 1% DMF, pure DMF, and pure DMSO. The thermochemistry for the CH2Cl2 solvent system was redrawn based on the analysis of 1.3. For the DMF solvent system, the SMD solvation model was applied using DMF as the solvent. The structures of catalytic intermediates were optimized with a DMSO molecule coordinated to the metal center instead of DMF, unlike the other solvent systems. We calculated a portion of the catalytic cycle for three solvent systems starting from the key selectivity-determining intermediate, **[FeIIIL1–OOH]**, to the final species of the Fe porphyrin catalyst after releasing product molecules, **[FeIIIL1–OOH] + TFEdis.**

Supplementary Fig 153. Relative Gibbs free energy diagram (in kcal mol–1) for ORR catalytic intermediates on Fe porphyrin catalyst: Comparison of systems with (▬, green) and without (▬, gray) Sc3+ solvated in CH2Cl2. Elementary steps involving electron transfer processes are indicated by dotted lines, and the thermochemistry was calculated relative to a potential of –0.4 V versus the Fc+/0 reference.

Supplementary Fig 154. Relative Gibbs free energy diagram (in kcal mol–1) for ORR catalytic intermediates on Fe porphyrin catalyst: Comparison of systems with (▬, green) and without (▬, gray) Sc3+ solvated in DMF. Elementary steps involving electron transfer processes are indicated by dotted lines, and the thermochemistry was calculated relative to a potential of –0.4 V versus the Fc+/0 reference.

Supplementary Fig 155. Relative Gibbs free energy diagram (in kcal mol–1) for ORR catalytic intermediates on Fe porphyrin catalyst: Comparison of systems with (▬, green) and without (▬, gray) Sc3+ ion solvated in DMSO. Elementary steps involving electron transfer processes are indicated by dotted lines, and the thermochemistry was calculated relative to a potential of –0.4 V versus the Fc+/0 reference.

We investigated the influence of Sc3+ on the selectivity of the ORR to elucidate the origin of the selectivity change induced by the addition of a redox-inactive metal salt (**Section 9.**). The thermochemistry of the ORR catalytic cycle was calculated, starting from the **FeᴵᴵᴵL1** state and proceeding to the final species of the Fe porphyrin catalyst, **FeᴵᴵᴵL1** **–TFEdeproton**, after the release of product molecules. Without coordination of the deprotonated TFE (generated after proton transfer to the catalytic intermediate), the final step to close the catalytic cycle was highly endothermic, rendering the catalysis non-viable due to the loss of binding energy of the axial ligand. The binding energy of the deprotonated TFE to the **FeᴵᴵᴵL1** species was calculated to be −28.6 kcal mol−1 in the presence of Sc3+ and −29.0 kcal mol−1 in its absence. Notably, the proton of TFE in the **[FeIIIL1–OOH] + TFEdis** species transferred to the distal oxygen upon reduction with an electron in the presence of Sc3+, suggesting a multi-site proton-coupled electron transfer mechanism (**Table S16**).

Table S16. Mulliken spin density at the Fe center obtained from single point calculations and geometric parameters of the Fe-hydroperoxo species with hydrogen bonding between the distal oxygen and TFE in the optimized structures.

| Cation | Species | Odistal–H / Å | OTFE–H / Å | ρFe |
| --- | --- | --- | --- | --- |
| X | **[FeIIIL1–OOH]+TFEdis** | 1.788 | 0.983 | 0.881 |
| X | **[FeIIL1–OOH] +TFEdis** | 1.660 | 0.997 | 2.188 |
| Sc3+ | **[FeIIIL1–OOH]+TFEdis** | 1.472 | 1.036 | 0.974 |
| Sc3+ | **[FeIIL1–OOH] +TFEdis** | 1.041 | 1.445 | 2.132 |

## Fe K-edge pre-edge Spectra

The Fe K-edge pre-edge XAS spectra were analyzed using the TD-DFT approach within the ORCA program package. Two Fe porphyrin species, **[FeIIIL1]+** and **[FeIIIL1–OO•],** were analyzed in the presence and absence of Sc3+. Since the experimental generation of **[FeIII L1–OO•]** involved the use of potassium superoxide (KO2), a potassium ion (K+) was encapsulated in the crown ether to model **[FeIII L1–OO•]** in the absence of Sc3+. The geometries used for these calculations were derived from structures optimized with the B3LYP functional, as described earlier. The BP86 functional16,17 was employed specifically for calculating the Fe K-edge pre-edge spectra. A combination of the CP(PPP) basis set18 for Fe and the TZVP basis set19 for all other atoms was utilized, as this combination of functional and basis set has been shown to effectively reproduce experimental Fe K-edge pre-edge spectra.20 Following ground-state DFT calculations, TD-DFT calculations were performed, restricting excitations from the Fe 1s orbital. For scandium-bound complexes, two additional anionic point charges were introduced to maintain charge balance relative to Sc3+-free complexes, utilizing the ORCA implementation. This charge balancing was essential to accurately reproduce the changes in relative intensities of the Fe K-edge pre-edge spectra for systems with and without Sc3+. The absorption bands were broadened by 2 eV to simulate the spectrum. The calculated spectra shifted by 181.9 eV to compensate for the systematic error of the computation.

Supplementary Fig 156. Comparison of experimental and calculated Fe K-edge pre-edge XAS spectra of [FeIIIL1]+ in the absence of Sc3+. The experimental spectrum was deconvoluted using a large Gaussian function to simulate the rising edge and three additional Gaussian functions to simulate the pre-edge features. The quartet (S = 3/2) spin state (▬, red) and the sextet (S = 5/2) spin state (▬, gray) are shown. A stick diagram of the absorption bands with relative oscillator strengths (▬, blue) is also included.

Supplementary Fig 157. Comparison of the experimental and calculated Fe K-edge pre-edge XAS spectra of [FeIIIL1]+ in the presence of Sc3+. The experimental spectrum was deconvoluted using a large Gaussian function to simulate the rising edge and three additional Gaussian functions to simulate the pre-edge portion. The quartet (S = 3/2) spin state (▬, red) and the sextet (S = 5/2) spin state (▬, gray) are displayed. A stick diagram of the absorption bands with relative oscillator strengths (▬, blue) is also included.

Supplementary Fig 158. Comparison of the experimental and calculated Fe K-edge pre-edge XAS spectra of [FeIIIL1–OO•] in the presence of K+. The experimental spectrum was deconvoluted using a large Gaussian function to simulate the rising edge and three additional Gaussian functions to simulate the pre-edge portion. The triplet (S = 1) spin state (▬, red) and the quintet (S = 2) spin state (▬, gray) are displayed. A stick diagram of the absorption bands with relative oscillator strengths (▬, blue) is also included.

Supplementary Fig 159. Comparison of the experimental and calculated Fe K-edge pre-edge XAS spectra of [FeIIIL1–OO•] in the presence of Sc3+. The experimental spectrum was deconvoluted using a large Gaussian function to simulate the rising edge and three additional Gaussian functions to simulate the pre-edge portion. The triplet (S = 1) spin state (▬, red) and the quintet (S = 2) spin state (▬, gray) are displayed. A stick diagram of the absorption bands with relative oscillator strengths (▬, blue) is also included.

# Copies of NMR spectra

## NMR spectra of **S6**

## NMR spectra of **L1**

## NMR spectra of **L2**

## NMR spectra of **T*p*OMePP**

## NMR spectra of **TF10PP**

## NMR spectra of **TF20PP**

## NMR spectra of **ZnL1**

## NMR spectra of **ZnL1-CN_K**

## NMR spectra of **ZnL2**

## NMR spectra of **FeL1-Cl**

## NMR spectra of **FeL1-Im2**

# Reference

1 Wuttig, A., Yoon, Y., Ryu, J. & Surendranath, Y. Bicarbonate Is Not a General Acid in Au-Catalyzed CO2 Electroreduction. *J. Am. Chem. Soc.* **139**, 17109-17113 (2017).

2 Thordarson, P. Determining association constants from titration experiments in supramolecular chemistry. *Chem. Soc. Rev.* **40**, 1305-1323 (2011).

3 Hanaway, D. J. & Kennedy, C. R. Automated Variable Electric-Field DFT Application for Evaluation of Optimally Oriented Electric Fields on Chemical Reactivity. *J. Org. Chem.* **88**, 106-115 (2023).

4 Maitra, A., Das, P., Thompson, B. C. & Dawlaty, J. M. Distinguishing between the Electrostatic Effects and Explicit Ion Interactions in a Stark Probe. *J. Chem. Phys. B* **127**, 2511-2520 (2023).

5 Brezny, A. C., Johnson, S. I., Raugei, S. & Mayer, J. M. Selectivity-Determining Steps in O2 Reduction Catalyzed by Iron(tetramesitylporphyrin). *J. Am. Chem. Soc.* **142**, 4108-4113 (2020).

6 Brown, M. D. *et al.* Primary and secondary coordination of crown ethers to scandium(iii). Synthesis, properties and structures of the reaction products of ScCl3(thf)3, ScCl3·6H2O and Sc(NO3)3·5H2O with crown ethers. *Dalton Trans.*, 857-865 (2003).

7 Champion, M. J. D., Farina, P., Levason, W. & Reid, G. Trivalent scandium, yttrium and lanthanide complexes with thia-oxa and selena-oxa macrocycles and crown ether coordination. *Dalton Trans.* **42**, 13179-13189 (2013).

8 Willey, G. R., Lakin, M. T. & Alcock, N. W. Crown ether complexation of scandium(III), yttrium(III) and lanthanum(III) halides. Synthesis and spectroscopic characterisation of anhydrous cationic metal-oxacrown species and crystal structure of a scandium benzocrown. *J. Chem. Soc., Dalton Trans.*, 3407-3411 (1993).

9 Willey, G. R., Meehan, P. R., Rudd, M. D. & Drew, M. G. B. Crown ether complexation of scandium(III). Formation and spectroscopic characterisation of ScCl2+–oxacrown species and crystal structures of two scandium dibenzocrowns. *J. Chem. Soc., Dalton Trans.*, 811-817 (1995).

10 Huang, X. & Groves, J. T. Oxygen Activation and Radical Transformations in Heme Proteins and Metalloporphyrins. *Chem. Rev.* **118**, 2491-2553 (2018).

11 de Visser, S. P., Valentine, J. S. & Nam, W. A Biomimetic Ferric Hydroperoxo Porphyrin Intermediate. *Angew. Chem. Int. Ed.* **49**, 2099-2101 (2010).

12 Liu, J.-G. *et al.* Spectroscopic Characterization of a Hydroperoxo–Heme Intermediate: Conversion of a Side-On Peroxo to an End-On Hydroperoxo Complex. *Angew. Chem. Int. Ed.* **48**, 9262-9267 (2009).

13 Garcia-Serres, R. *et al.* Distinct Reaction Pathways Followed upon Reduction of Oxy-Heme Oxygenase and Oxy-Myoglobin as Characterized by Mössbauer Spectroscopy. *J. Am. Chem. Soc.* **129**, 1402-1412 (2007).

14 Meunier, B., de Visser, S. P. & Shaik, S. Mechanism of Oxidation Reactions Catalyzed by Cytochrome P450 Enzymes. *Chem. Rev.* **104**, 3947-3980 (2004).

15 Zhang, W., Lai, W. & Cao, R. Energy-Related Small Molecule Activation Reactions: Oxygen Reduction and Hydrogen and Oxygen Evolution Reactions Catalyzed by Porphyrin- and Corrole-Based Systems. *Chem. Rev.* **117**, 3717-3797 (2017).

16 Becke, A. D. Density-functional exchange-energy approximation with correct asymptotic behavior. *Phys. Rev. A* **38**, 3098-3100 (1988).

17 Perdew, J. P. Density-functional approximation for the correlation energy of the inhomogeneous electron gas. *Phys. Rev. B* **33**, 8822-8824 (1986).

18 Neese, F. Prediction and interpretation of the 57Fe isomer shift in Mössbauer spectra by density functional theory. *Inorg. Chim. Acta* **337**, 181-192 (2002).

19 Schäfer, A., Huber, C. & Ahlrichs, R. Fully optimized contracted Gaussian basis sets of triple zeta valence quality for atoms Li to Kr. *J. Chem. Phys* **100**, 5829-5835 (1994).

20 DeBeer George, S., Petrenko, T. & Neese, F. Prediction of Iron K-Edge Absorption Spectra Using Time-Dependent Density Functional Theory. *J. Chem. Phys. A* **112**, 12936-12943 (2008).
